# Supplementary material for: Metal-free hydrosulfonylation of α,β-unsaturated ketones: synthesis and application of γ-keto sulfones
Source: Royal Society of Chemistry journal article supplement (doi:10.1039/d2ra06784f), 2022-01-01

## Supporting Information

### Table of Contents

|                                                                    |           |
|--------------------------------------------------------------------|-----------|
| <b>1. General information</b>                                      | <b>2</b>  |
| <b>2. Experimental procedure</b>                                   | <b>2</b>  |
| <b>3. control experimants</b>                                      | <b>4</b>  |
| <b>4. Characterization data of products</b>                        | <b>6</b>  |
| <b>5. X-ray Crystal Structure for 6fa</b>                          | <b>28</b> |
| <b>6. References</b>                                               | <b>28</b> |
| <b>7. <sup>1</sup>H and <sup>13</sup>C NMR spectra of products</b> | <b>30</b> |

## 1. General information:

All experiments were carried out under an atmosphere of air. Flash column chromatography was performed over silica gel 48-75  $\mu\text{m}$ .  $^1\text{H}$  NMR and  $^{13}\text{C}$  NMR spectra were recorded on Bruker-AV (500 MHz and 126 MHz, respectively) instrument internally referenced to  $\text{SiMe}_4$  or chloroform signals. HRMS was recorded using waters G2-Xs qtof mass spectrometer. The new compounds were characterized by  $^1\text{H}$  NMR,  $^{13}\text{C}$  NMR, MS and HRMS. The structures of known compounds were further corroborated by comparing their  $^1\text{H}$  NMR,  $^{13}\text{C}$  NMR data and MS data with those of literature. The Substrates **1**<sup>[1]</sup> was synthesized according to the reported methods. All reagents and solvents were used as received from commercial sources without further purification.

## 2. Experimental procedures

### a) General procedure: (E)-1-phenyl-3-(phenylsulfonyl)prop-2-en-1-one (**3a**):

A 10 mL oven-dried reaction vessel was charged with 1-phenylprop-2-yn-1-one (**1a**, 26.0 mg, 0.2mmol), sodium benzenesulfinate (**2a**, 65.7 mg, 0.4 mmol) and 4-chlorobenzoic acid (62.7 mg, 0.4 mmol). The reaction with mesitylene (2.0 mL) was added to the sealed reaction vessel by syringe. The resulting solution was stirred at 30 °C for 48 h. After cooling to room temperature, the volatiles were removed under vacuum and the residue was purified by column chromatography (petroleum ether/ethyl acetate = 5:1) to give **3a** as white solid; yield: 52.8 mg (97%, E:Z = 98:02).

### b) Scaled-up Version of the

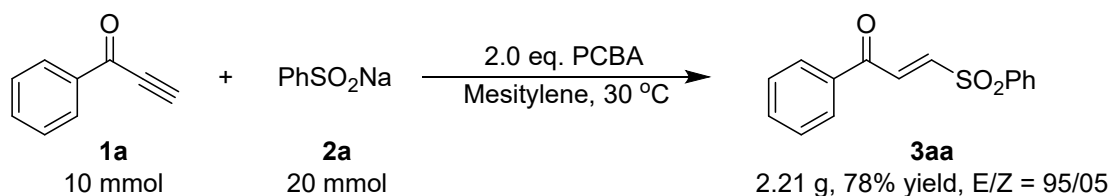

To a dried round bottle flask with a magnetic stirring bar were added the 1-phenylprop-2-yn-1-one **1a** (10 mmol), sodium benzenesulfinate **2a** (20 mmol), and 4-chlorobenzoic acid (20 mmol), followed by the addition of mesitylene (50 mL). The reaction mixture was stirred at room temperature for 50 h. The solvent was removed under reduced pressure, and the residue was purified by column chromatography on silica gel to afford **3aa** in 2.21 g (78% yield).

**c) Procedure for the synthesis of derivative 6a**

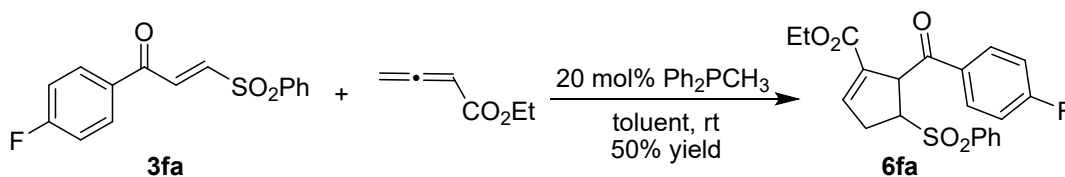

Under air, a stirred solution of **3fa** (0.2 mmol) and  $\text{Ph}_2\text{PCH}_3$  (0.04 mmol) in toluene (2 mL). Subsequently, ethyl buta-2,3-dienoate (0.24 mmol) was added in one portion. The reaction mixture was stirred for 24 h in room temperature, the solvents were removed in vacuo and the residue was directly purified by silica gel chromatography using petroleum ether/EtOAc as the eluent to afford the desired cycloaddition product **6fa**.

**d) Procedure for the synthesis of derivative 6b**

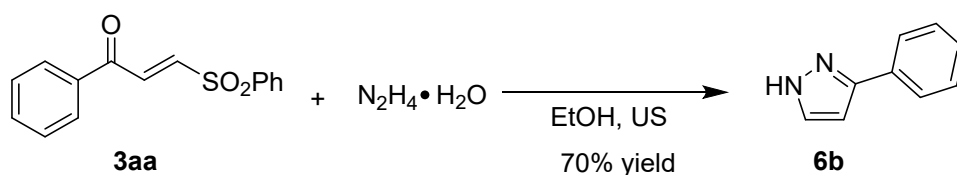

A round-bottom flask was charged with **3aa** (0.20 mmol),  $\text{N}_2\text{H}_4 \cdot \text{H}_2\text{O}$  (0.60 mmol) and EtOH (2 mL). The resultant mixture was allowed to react for 15 minutes under ultrasound irradiation (40 kHz / 50 W). Then the mixture was extracted with ethyl acetate ( $3 \times 20$  mL). The organic phase was dried over anhydrous  $\text{Na}_2\text{SO}_4$ , and the organic solvent was removed under reduced pressure. The crude products were purified by flash column chromatography to give the desired product **6b** in 70% yield.

**e) Procedure for the synthesis of derivative 6c**

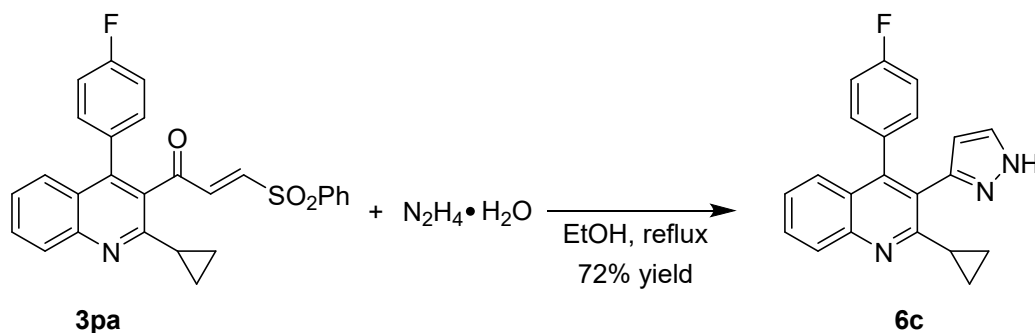

A round-bottom flask was charged with **3pa** (0.30 mmol),  $\text{N}_2\text{H}_4 \cdot \text{H}_2\text{O}$  (4.5 mmol) and EtOH (10

mL). The resultant mixture was refluxed for 6 h, and then extracted with ethyl acetate ( $3 \times 20$  mL). The organic phase was dried over anhydrous  $\text{Na}_2\text{SO}_4$ , and the organic solvent was removed under reduced pressure. The crude products were purified by flash column chromatography to give the desired product **6c** in 72% yield.

### **3. Control experiments<sup>a</sup>**

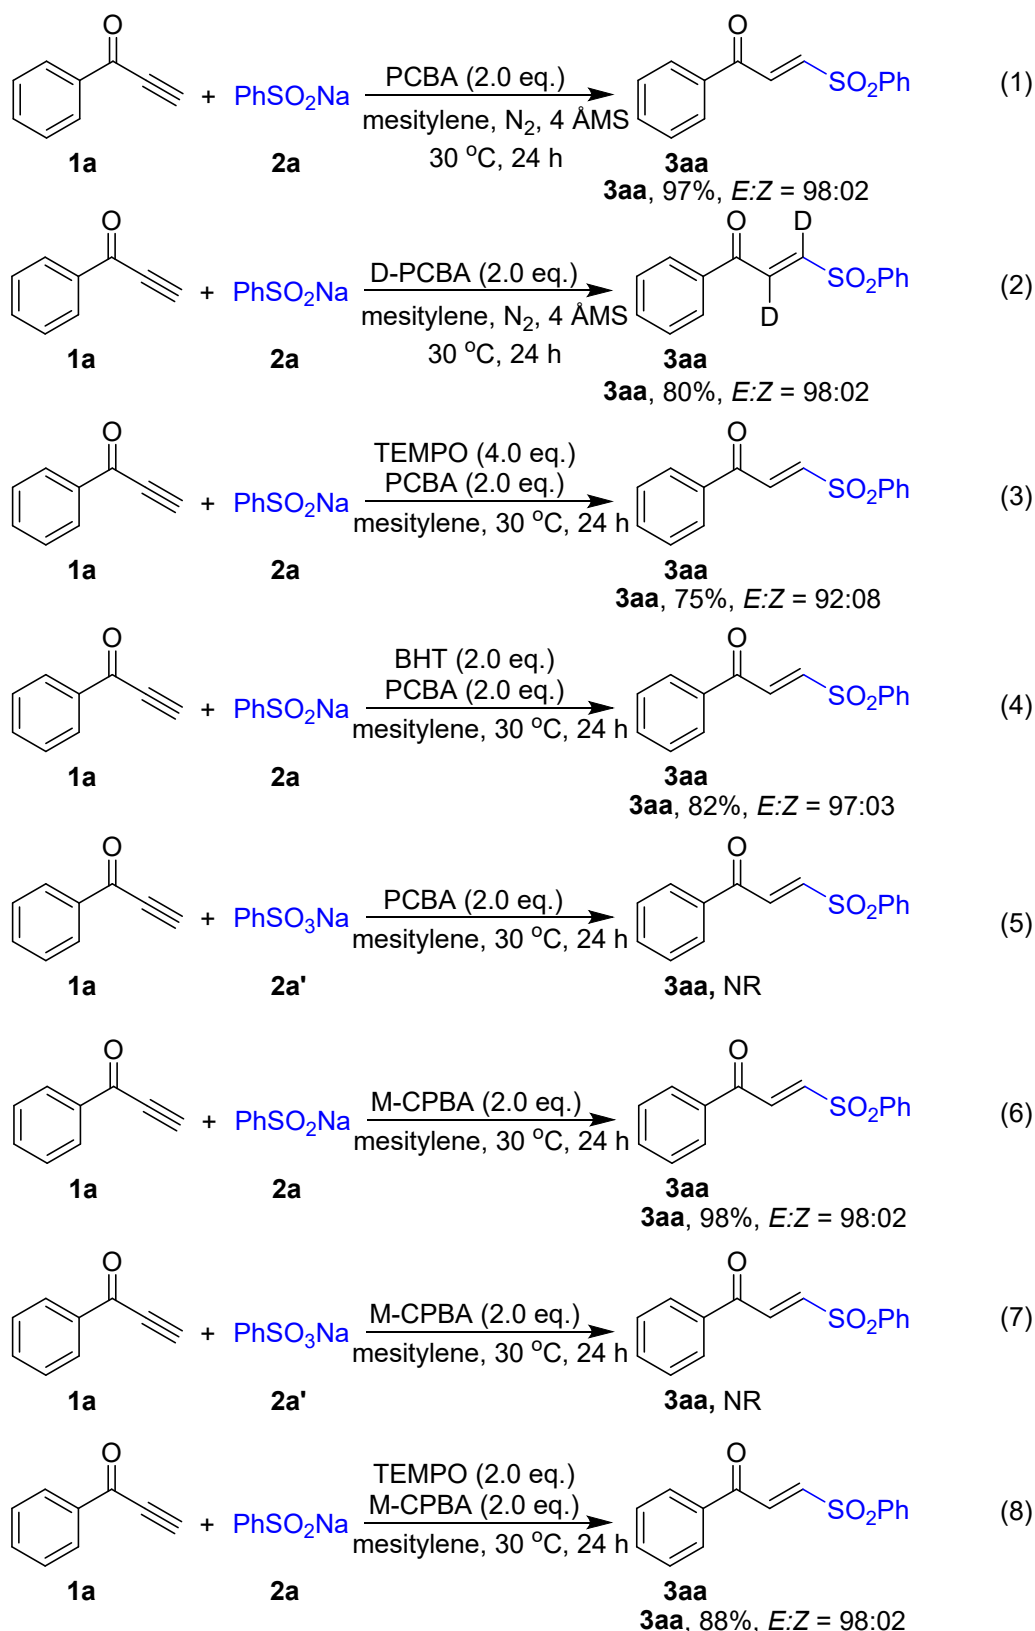

<sup>a</sup> Reaction conditions: **1a** (0.05 mmol), **2a** (0.125 mmol), mesitylene (1.0 mL), 30 °C. The yield was determined by <sup>1</sup>H NMR. *E/Z* ratio was determined by RP-HPLC.

#### 4. Characterization data of the products

**(E)-1-phenyl-3-(phenylsulfonyl)prop-2-en-1-one (3aa)<sup>2</sup>**

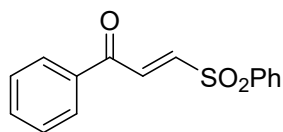

m.p.: 105-109 °C; <sup>1</sup>H NMR (500 MHz, CDCl<sub>3</sub>) δ 8.04 (d, *J* = 8.5 Hz, 1H), 8.00-7.92 (m, 4H), 7.70-7.59 (m, 3H), 7.54 (t, *J* = 7.8 Hz, 2H), 7.46 (d, *J* = 8.5 Hz, 1H), 7.36 (d, *J* = 14.9 Hz, 1H); <sup>13</sup>C NMR (126 MHz, CDCl<sub>3</sub>) δ 187.63, 141.97, 138.56, 135.95, 134.51, 134.38, 133.03, 129.66, 129.09, 128.98, 128.29; IR: 3041, 1669, 1592, 1324, 1146, 1086 cm<sup>-1</sup>.

**(E)-3-(phenylsulfonyl)-1-(p-tolyl)prop-2-en-1-one (3ba)**

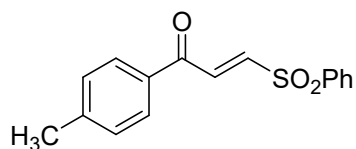

The reaction was conducted with 1-(p-tolyl) prop-2-yn-1-one (**1b**, 28.4 mg, 0.2 mmol), sodium benzenesulfinate (**2a**, 82.1 mg, 0.5 mmol) and 4-chlorobenzoic acid (62.6 mg, 0.4 mmol). The residue was purified by column chromatography (silica gel, petroleum ether/ethyl acetate = 4:1) to give **3ba** as white solid; yield 98%, E:Z = 90:10.

m.p.: 116-120 °C; <sup>1</sup>H NMR (500 MHz, CDCl<sub>3</sub>) δ 7.97-7.88 (m, 5H), 7.68 (t, *J* = 7.4 Hz, 1H), 7.59 (t, *J* = 7.7 Hz, 2H), 7.34 (dd, *J* = 18.4, 11.4 Hz, 3H), 2.44 (s, 3H); <sup>13</sup>C NMR (126 MHz, CDCl<sub>3</sub>) δ 187.09, 145.81, 141.63, 138.72, 134.35, 133.57, 133.32, 129.82, 129.67, 129.16, 128.28, 21.89. HRMS (ESI) *m/z* calcd. for C<sub>16</sub>H<sub>14</sub>O<sub>3</sub>NaS [M+Na]<sup>+</sup> = 309.0561, found 309.0569; IR: 3058, 3027, 1661, 1315, 1155, 1089 cm<sup>-1</sup>.

**(E)-1-(4-methoxyphenyl)-3-(phenylsulfonyl)prop-2-en-1-one (3ca)<sup>3</sup>**

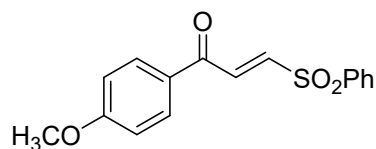

The reaction was conducted with 1-(4-methoxyphenyl)prop-2-yn-1-one (**1c**, 32.0 mg, 0.2 mmol), sodium benzenesulfinate (**2a**, 82.1 mg, 0.5 mmol) and 4-chlorobenzoic acid (62.6 mg, 0.4 mmol). The residue was purified by column chromatography (silica gel, petroleum ether/ethyl acetate = 4:1) to give **3ca** as viscous liquid; yield 71%, E:Z = 81:19.

$^1\text{H}$  NMR (500 MHz,  $\text{CDCl}_3$ )  $\delta$  7.93-7.85 (m, 5H), 7.61 (t,  $J = 7.4$  Hz, 1H), 7.52 (t,  $J = 7.7$  Hz, 2H), 7.28-7.19 (m, 1H), 6.92 (d,  $J = 8.9$  Hz, 2H), 3.83 (s, 3H);  $^{13}\text{C}$  NMR (126 MHz,  $\text{CDCl}_3$ )  $\delta$  184.70, 163.71, 140.25, 137.83, 133.23, 132.37, 130.51, 128.60, 128.13, 127.22, 113.34, 54.65.

**(E)-1-(4-(methylthio)phenyl)-3-(phenylsulfonyl)prop-2-en-1-one (3da)**

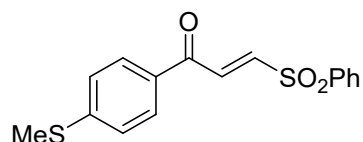

The reaction was conducted with 1-(4-(methylthio)phenyl)prop-2-yn-1-one (**1d**, 35.3 mg, 0.2 mmol), sodium benzenesulfinate (**2a**, 82.1 mg, 0.5 mmol) and 4-chlorobenzoic acid (62.6 mg, 0.4 mmol). The residue was purified by column chromatography (silica gel, petroleum ether/ethyl acetate = 4:1) to give **3da** as yellow solid; yield 82%, E:Z = 94:06.

m.p.: 137-140 °C;  $^1\text{H}$  NMR (500 MHz,  $\text{CDCl}_3$ )  $\delta$  7.84 (dd,  $J = 28.5, 8.2$  Hz, 5H), 7.60 (t,  $J = 7.1$  Hz, 1H), 7.51 (t,  $J = 7.3$  Hz, 2H), 7.28 (d,  $J = 14.8$  Hz, 1H), 7.21 (d,  $J = 8.1$  Hz, 2H), 2.45 (s, 3H);  $^{13}\text{C}$  NMR (126 MHz,  $\text{CDCl}_3$ )  $\delta$  186.22, 148.51, 141.64, 138.65, 134.39, 133.04, 132.14, 129.69, 129.36, 128.29, 125.06, 14.62. HRMS (ESI)  $m/z$  calcd. for  $\text{C}_{16}\text{H}_{14}\text{O}_3\text{NS}_2$   $[\text{M}+\text{Na}]^+ = 341.0282$ , found 341.0284; IR: 3047, 1656, 1586, 1320, 1148, 817  $\text{cm}^{-1}$ .

**(E)-1-([1,1'-biphenyl]-4-yl)-3-(phenylsulfonyl)prop-2-en-1-one (3ea)**

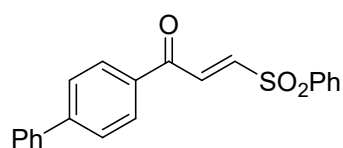

The reaction was conducted with 1-([1,1'-biphenyl]-4-yl)prop-2-yn-1-one (**1e**, 41.25 mg, 0.2 mmol), sodium benzenesulfinate (**2a**, 82.1 mg, 0.5 mmol) and 4-chlorobenzoic acid (62.6 mg, 0.4 mmol). The residue was purified by column chromatography (silica gel, petroleum ether/ethyl acetate = 4:1) to give **3ea** as yellow solid; yield 94%, E:Z = 83:17.

m.p.: 191-198 °C;  $^1\text{H}$  NMR (500 MHz,  $\text{CDCl}_3$ )  $\delta$  8.08-7.96 (m, 5H), 7.75 (d,  $J = 8.3$  Hz, 2H), 7.70 (t,  $J = 7.5$  Hz, 1H), 7.65 (d,  $J = 7.2$  Hz, 2H), 7.60 (dd,  $J = 15.8, 8.1$  Hz, 2H), 7.50 (t,  $J = 7.4$  Hz, 2H), 7.46-7.38 (m, 2H);  $^{13}\text{C}$  NMR (126 MHz,  $\text{CDCl}_3$ )  $\delta$  187.10, 147.24, 141.92, 139.37, 138.63, 134.69, 134.43, 133.09, 129.72, 129.68, 129.12, 128.72, 128.34, 127.71, 127.38. HRMS (ESI)  $m/z$

calcd. for  $C_{21}H_{16}O_3SNa$   $[M+Na]^+ = 371.0718$ , found 371.0722; IR: 2978, 1686, 1592, 1426, 1322, 1093  $cm^{-1}$ .

**(E)-1-([1,1'-biphenyl]-4-yl)-3-(phenylsulfonyl)prop-2-en-1-one (3fa)**

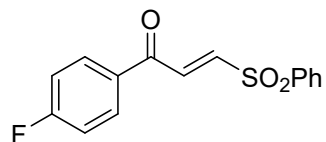

The reaction was conducted with 1-(4-fluorophenyl)prop-2-yn-1-one (**1f**, 29.6 mg, 0.2 mmol), sodium benzenesulfinate (**2a**, 82.1 mg, 0.5 mmol) and 4-chlorobenzoic acid (76.8 mg, 0.4 mmol). The residue was purified by column chromatography (silica gel, petroleum ether/ethyl acetate = 4:1) to give **3fa** as yellow solid; yield 85%, E:Z = 95:05.

m.p.: 114-118 °C;  $^1H$  NMR (500 MHz,  $CDCl_3$ )  $\delta$  8.05-8.03 (m, 2H), 7.96 (d,  $J = 7.8$  Hz, 2H), 7.91 (d,  $J = 14.9$  Hz, 1H), 7.70 (t,  $J = 7.4$  Hz, 1H), 7.61 (t,  $J = 7.7$  Hz, 2H), 7.37 (d,  $J = 14.9$  Hz, 1H), 7.21 (t,  $J = 8.4$  Hz, 2H);  $^{13}C$  NMR (126 MHz,  $CDCl_3$ )  $\delta$  186.02, 166.54 (d,  $J = 257.8$  Hz), 142.25, 138.58, 134.43, 132.68, 132.49 (d,  $J = 2.8$  Hz), 131.81 (d,  $J = 9.8$  Hz), 129.70, 128.32, 116.42 (d,  $J = 22.1$  Hz);  $^{19}F$  NMR (471 MHz,  $CDCl_3$ )  $\delta$  -101.93. HRMS (ESI)  $m/z$  calcd. for  $C_{15}H_{11}O_3NaSF$   $[M+Na]^+ = 313.0311$ , found 313.0317; IR: 3078, 1664, 1591, 1310, 1155, 837  $cm^{-1}$ .

**(E)-1-(4-chlorophenyl)-3-(phenylsulfonyl)prop-2-en-1-one (3ga)<sup>4</sup>**

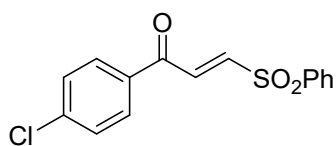

The reaction was conducted with 1-(4-chlorophenyl)prop-2-yn-1-one (**1g**, 32.9 mg, 0.2 mmol), sodium benzenesulfinate (**2a**, 82.1 mg, 0.5 mmol) and 4-chlorobenzoic acid (62.6 mg, 0.4 mmol). The residue was purified by column chromatography (silica gel, petroleum ether/ethyl acetate = 5:1) to give **3ga** as white solid; yield 93%, E:Z = 97:03.

m.p.: 130-137 °C;  $^1H$  NMR (500 MHz,  $CDCl_3$ )  $\delta$  7.97-7.89 (m, 5H), 7.70 (t,  $J = 7.3$  Hz, 1H), 7.61 (t,  $J = 7.6$  Hz, 2H), 7.51 (d,  $J = 8.4$  Hz, 2H), 7.38 (d,  $J = 14.9$  Hz, 1H);  $^{13}C$  NMR (126 MHz,  $CDCl_3$ )  $\delta$  186.44, 142.44, 141.20, 138.47, 134.50, 134.31, 132.45, 130.37, 129.74, 129.50, 128.34; IR: 3045, 1683, 185, 1321, 1254, 1009  $cm^{-1}$ .



**(E)-1-(4-bromophenyl)-3-(phenylsulfonyl)prop-2-en-1-one (3ha)**

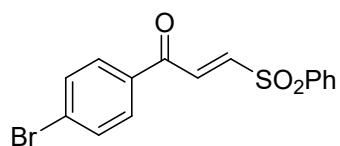

The reaction was conducted with 1-(4-bromophenyl)prop-2-yn-1-one (**1h**, 41.8 mg, 0.2 mmol), sodium benzenesulfinate (**2a**, 82.1 mg, 0.5 mmol) and 4-chlorobenzoic acid (62.6 mg, 0.4 mmol). The residue was purified by column chromatography (silica gel, petroleum ether/ethyl acetate = 4:1) to give **3ha** as white solid; yield 97%, E:Z = 98:02.

m.p.: 140-144 °C; <sup>1</sup>H NMR (500 MHz, CDCl<sub>3</sub>) δ 7.88 (d, *J* = 7.7 Hz, 2H), 7.79 (dd, *J* = 13.9, 11.9 Hz, 3H), 7.61 (dd, *J* = 16.1, 7.9 Hz, 3H), 7.53 (t, *J* = 7.7 Hz, 2H), 7.31-7.19 (m, 1H); <sup>13</sup>C NMR (126 MHz, CDCl<sub>3</sub>) δ 185.63, 141.47, 137.50, 133.70, 133.42, 131.45, 131.38, 129.33, 128.99, 128.67, 127.29. HRMS (ESI) *m/z* calcd. for C<sub>15</sub>H<sub>12</sub>O<sub>3</sub>SBr [M+H]<sup>+</sup> = 350.9691, found 350.9686; IR: 3043, 1685, 1580, 1321, 1154, 999 cm<sup>-1</sup>.

**(E)-1-(4-iodophenyl)-3-(phenylsulfonyl)prop-2-en-1-one (3ia)**

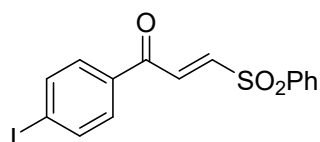

The reaction was conducted with 1-(4-iodophenyl)prop-2-yn-1-one (**1i**, 51.2 mg, 0.2 mmol), sodium benzenesulfinate (**2a**, 82.1 mg, 0.5 mmol) and 4-chlorobenzoic acid (62.6 mg, 0.4 mmol). The residue was purified by column chromatography (silica gel, petroleum ether/ethyl acetate = 5:1) to give **3i** as white solid; yield 86%, E:Z = 85:15.

m.p.: 165-170 °C; <sup>1</sup>H NMR (500 MHz, CDCl<sub>3</sub>) δ 7.88 (d, *J* = 6.4 Hz, 2H), 7.81 (t, *J* = 10.8 Hz, 3H), 7.62 (d, *J* = 6.6 Hz, 3H), 7.53 (s, 2H), 7.32-7.19 (m, 1H); <sup>13</sup>C NMR (126 MHz, CDCl<sub>3</sub>) δ 187.01, 142.48, 138.48, 138.24, 135.23, 134.51, 132.34, 130.16, 129.74, 128.35, 103.15. HRMS (ESI) *m/z* calcd. for C<sub>15</sub>H<sub>11</sub>O<sub>3</sub>NaSI [M+Na]<sup>+</sup> = 420.9371, found 420.9377; IR: 3034, 1682, 1575, 1320, 1149, 1001 cm<sup>-1</sup>.

**(E)-1-(4-(dimethylamino)phenyl)-3-(phenylsulfonyl)prop-2-en-1-one (3ja)**

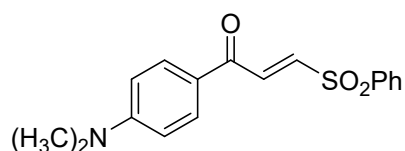

The reaction was conducted with 1-(4-(dimethylamino)phenyl)prop-2-yn-1-one (**1j**, 34.7 mg, 0.2 mmol), sodium benzenesulfinate (**2a**, 82.1 mg, 0.5 mmol) and 4-chlorobenzoic acid (62.6 mg, 0.4 mmol). The residue was purified by column chromatography (silica gel, petroleum ether/ethyl acetate = 4:1) to give **3ja** as red solid; yield 73%, E:Z = 82:18.

m.p.: 45-58 °C; <sup>1</sup>H NMR (500 MHz, CDCl<sub>3</sub>) δ 7.99-7.91 (m, 5H), 7.67 (t, *J* = 7.2 Hz, 1H), 7.58 (t, *J* = 7.5 Hz, 2H), 7.34 -7.27 (m, 1H), 6.67 (d, *J* = 8.7 Hz, 2H), 3.10 (s, 6H); <sup>13</sup>C NMR (126 MHz, CDCl<sub>3</sub>) δ 184.09, 154.26, 139.87, 139.10, 134.14, 134.12, 131.61, 129.57, 128.80, 128.18, 124.01, 111.00, 40.11. HRMS (ESI) *m/z* calcd. for C<sub>17</sub>H<sub>17</sub>NO<sub>3</sub>NaS [M+Na]<sup>+</sup> = 338.0827, found 338.0833; IR: 2924, 1684, 1593, 1322, 1176, 853 cm<sup>-1</sup>.

**(E)-3-(phenylsulfonyl)-1-(4-(trifluoromethyl)phenyl)prop-2-en-1-one (3ka)**

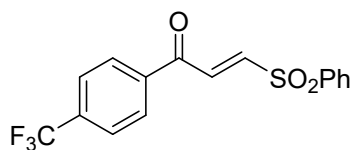

The reaction was conducted with 1-(4-(trifluoromethyl)phenyl)prop-2-yn-1-one (**1k**, 39.6 mg, 0.2 mmol), sodium benzenesulfinate (**2a**, 82.1 mg, 0.5 mmol) and 4-chlorobenzoic acid (62.6 mg, 0.4 mmol). The residue was purified by column chromatography (silica gel, petroleum ether/ethyl acetate = 4:1) to give **3ka** as yellow solid; yield 95%, E:Z = 98:02.

m.p.: 146-150 °C; <sup>1</sup>H NMR (500 MHz, CDCl<sub>3</sub>) δ 8.10 (d, *J* = 7.8 Hz, 2H), 7.95 (dd, *J* = 21.2, 11.5 Hz, 4H), 7.79 (d, *J* = 7.9 Hz, 2H), 7.61 (t, *J* = 7.4 Hz, 2H), 7.42 (d, *J* = 14.9 Hz, 1H); <sup>13</sup>C NMR (126 MHz, CDCl<sub>3</sub>) δ 186.95, 143.05, 138.60, 138.36, 135.46 (d, *J* = 32.9 Hz), 134.57, 132.21, 129.76, 129.30, 128.36, 126.14 (q, *J* = 3.8 Hz), 123.35 (q, *J* = 273.0 Hz); <sup>19</sup>F NMR (471 MHz, CDCl<sub>3</sub>) δ -63.22; HRMS (ESI) *m/z* calcd. for C<sub>16</sub>H<sub>11</sub>O<sub>3</sub>NaSF<sub>3</sub> [M+Na]<sup>+</sup> = 363.0279, found 363.0273; IR: 3045, 1671, 1415, 1319, 1131, 751 cm<sup>-1</sup>.

**(E)-1-(2-nitrophenyl)-3-(phenylsulfonyl)prop-2-en-1-one (3la)**

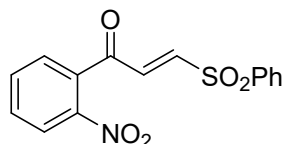

The reaction was conducted with 1-(2-nitrophenyl)prop-2-en-1-one (**1l**, 35.0 mg, 0.2 mmol), sodium benzenesulfinate (**2a**, 82.1 mg, 0.5 mmol) and 4-chlorobenzoic acid (62.6 mg, 0.4 mmol). The residue was purified by column chromatography (silica gel, petroleum ether/ethyl acetate = 2:1) to give **3la** as white solid; yield 71%, E:Z = 97:03.

m.p.: 121-128 °C; <sup>1</sup>H NMR (500 MHz, CDCl<sub>3</sub>) δ 8.18 (d, *J* = 8.2 Hz, 1H), 7.90 (d, *J* = 7.7 Hz, 2H), 7.80 (t, *J* = 7.5 Hz, 1H), 7.71 (dd, *J* = 11.9, 7.5 Hz, 2H), 7.60 (t, *J* = 7.8 Hz, 2H), 7.48 (d, *J* = 7.5 Hz, 1H), 7.29-7.26 (m, 1H), 7.04 (d, *J* = 15.3 Hz, 1H); <sup>13</sup>C NMR (126 MHz, CDCl<sub>3</sub>) δ 189.52, 146.20, 141.24, 138.18, 135.71, 134.90, 134.81, 134.59, 132.00, 129.76, 128.82, 128.34, 124.76. HRMS (ESI) *m/z* calcd. for C<sub>15</sub>H<sub>11</sub>NO<sub>5</sub>SNa [M+Na]<sup>+</sup> = 340.0256, found 340.0264; IR: 3054, 1692, 1523, 1348, 1150, 794 cm<sup>-1</sup>.

**(E)-1-(anthracen-9-yl)-3-(phenylsulfonyl)prop-2-en-1-one (3ma)**

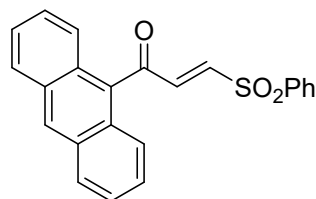

The reaction was conducted with 1-(anthracen-9-yl)prop-2-en-1-one (**1m**, 46.1 mg, 0.2 mmol), sodium benzenesulfinate (**2a**, 82.1 mg, 0.5 mmol) and 4-chlorobenzoic acid (62.6 mg, 0.4 mmol). The residue was purified by column chromatography (silica gel, petroleum ether/ethyl acetate = 4:1) to give **3ma** as red solid; yield 94%, E:Z = 98:02.

m.p.: 112-122 °C; <sup>1</sup>H NMR (500 MHz, CDCl<sub>3</sub>) δ 8.56 (s, 1H), 8.05-8.03 (m, 2H), 7.86 (d, *J* = 7.6 Hz, 2H), 7.76-7.74 (m, 2H), 7.66 (t, *J* = 7.3 Hz, 1H), 7.56-7.48 (m, 7H), 7.07 (d, *J* = 15.3 Hz, 1H); <sup>13</sup>C NMR (126 MHz, CDCl<sub>3</sub>) δ 196.41, 142.94, 138.38, 137.90, 134.48, 131.95, 130.94, 130.59, 129.68, 129.07, 128.40, 128.31, 127.69, 125.81, 124.28. HRMS (ESI) *m/z* calcd. for C<sub>23</sub>H<sub>16</sub>O<sub>3</sub>SNa [M+Na]<sup>+</sup> = 395.0718, found 395.0713; IR: 2923, 1679, 1592, 1284, 1092, 762 cm<sup>-1</sup>.

**(E)-3-(phenylsulfonyl)-1-(o-tolyl)prop-2-en-1-one (3na)**

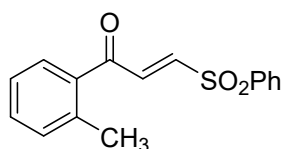

The reaction was conducted with 1-(*o*-tolyl)prop-2-yn-1-one (**1n**, 28.8 mg, 0.2 mmol), sodium benzenesulfinate (**2a**, 82.1 mg, 0.5 mmol) and 4-chlorobenzoic acid (62.6 mg, 0.4 mmol). The residue was purified by column chromatography (silica gel, petroleum ether/ethyl acetate = 4:1) to give **3na** as white solid; yield 82%, E:Z = 95:05.

m.p.: 82-84 °C; <sup>1</sup>H NMR (500 MHz, CDCl<sub>3</sub>) δ 7.95 (d, *J* = 7.8 Hz, 2H), 7.71-7.58 (m, 5H), 7.46 (t, *J* = 7.4 Hz, 1H), 7.33-7.27 (m, 2H), 7.22 (d, *J* = 15.0 Hz, 1H), 2.48 (s, 3H); <sup>13</sup>C NMR (126 MHz, CDCl<sub>3</sub>) δ 191.07, 141.73, 139.41, 138.61, 136.14, 135.88, 134.42, 132.80, 132.27, 129.78, 129.70, 128.31, 126.02, 21.19. HRMS (ESI) *m/z* calcd. for C<sub>16</sub>H<sub>14</sub>O<sub>3</sub>NaS [M+Na]<sup>+</sup> = 309.0561, found 309.0560; IR: 3038, 1673, 1600, 1306, 1147, 970 cm<sup>-1</sup>.

**(E)-3-(phenylsulfonyl)-1-(*m*-tolyl)prop-2-en-1-one (3oa)**

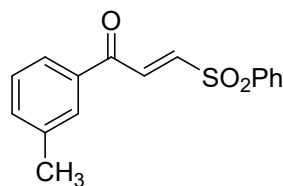

The reaction was conducted with 1-(*m*-tolyl)prop-2-yn-1-one (**1o**, 28.8 mg, 0.2 mmol), sodium benzenesulfinate (**2a**, 82.1 mg, 0.5 mmol) and 4-chlorobenzoic acid (62.6 mg, 0.4 mmol). The residue was purified by column chromatography (silica gel, petroleum ether/ethyl acetate = 4:1) to give **3oa** as yellow solid; yield 94%, E:Z = 95:05.

m.p.: 94-100 °C; <sup>1</sup>H NMR (500 MHz, CDCl<sub>3</sub>) δ 7.96 (dd, *J* = 10.7, 5.9 Hz, 3H), 7.79 (d, *J* = 8.4 Hz, 2H), 7.69 (t, *J* = 7.1 Hz, 1H), 7.60 (t, *J* = 7.5 Hz, 2H), 7.46 (d, *J* = 7.2 Hz, 1H), 7.43-7.35 (m, 2H), 2.43 (s, 3H); <sup>13</sup>C NMR (126 MHz, CDCl<sub>3</sub>) δ 187.74, 141.79, 139.10, 138.63, 136.01, 135.38, 134.41, 133.27, 129.70, 129.46, 128.99, 128.31, 126.28, 21.39. HRMS (ESI) *m/z* calcd. for C<sub>16</sub>H<sub>14</sub>O<sub>3</sub>Na [M+Na]<sup>+</sup> = 309.0561, found 309.0562; IR: 3037, 1663, 1592, 1284, 1144, 837 cm<sup>-1</sup>.

**(E)-1-(2-cyclopropyl-4-(4-fluorophenyl)quinolin-3-yl)-3-(phenylsulfonyl)prop-2-en-1-one (3pa)**

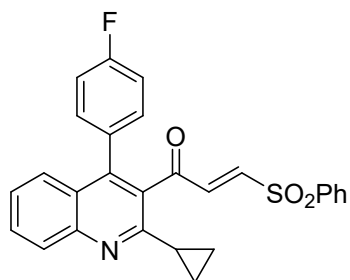

The reaction was conducted with 1-(2-cyclopropyl-4-(4-fluorophenyl)quinolin-3-yl)prop-2-yn-1-one (**1p**, 63.1 mg, 0.2 mmol), sodium benzenesulfinate (**2a**, 82.1 mg, 0.5 mmol) and 4-chlorobenzoic acid (62.6 mg, 0.4 mmol). The residue was purified by column chromatography (silica gel, petroleum ether/ethyl acetate = 4:1) to give **3pa** as yellow solid; yield 87%, E:Z = 97:03.

m.p.: 133-140 °C; <sup>1</sup>H NMR (500 MHz, CDCl<sub>3</sub>) δ 7.99 (d, *J* = 8.4 Hz, 1H), 7.70 (t, *J* = 8.7 Hz, 4H), 7.57 (t, *J* = 7.6 Hz, 2H), 7.51 (d, *J* = 8.3 Hz, 1H), 7.40 (t, *J* = 7.5 Hz, 1H), 7.17 (dd, *J* = 8.0, 5.4 Hz, 2H), 7.05 (t, *J* = 8.4 Hz, 2H), 6.83 (d, *J* = 3.1 Hz, 1H), 2.01-1.96 (m, 1H), 1.32 (dd, *J* = 6.5, 3.7 Hz, 2H), 0.98-0.95 (m, 2H); <sup>13</sup>C NMR (126 MHz, CDCl<sub>3</sub>) δ 194.89, 163.05 (d, *J* = 250.1 Hz), 158.36, 148.41, 144.45, 142.19, 138.41, 136.69, 134.44, 132.10 (d, *J* = 8.3 Hz), 131.55, 130.76, 130.60 (d, *J* = 3.5 Hz), 129.63, 129.30, 128.32, 126.52, 125.80, 124.46, 115.97 (d, *J* = 21.5 Hz), 15.58, 10.93; <sup>19</sup>F NMR (471 MHz, CDCl<sub>3</sub>) δ -110.94; HRMS (ESI) *m/z* calcd. for C<sub>27</sub>H<sub>21</sub>NO<sub>3</sub>SF [M+H]<sup>+</sup> = 458.1226, found 458.1235; IR: 3047, 1662, 1512, 1327, 1159, 848 cm<sup>-1</sup>.

#### (E)-4-(phenylsulfonyl)but-3-en-2-one (**3qa**)<sup>12</sup>

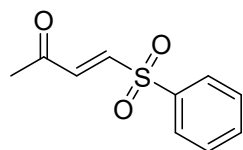

The reaction was conducted with but-3-yn-2-one (**1q**, 13.6 mg, 0.2 mmol), sodium benzenesulfinate (**2a**, 82.1 mg, 0.5 mmol) and 4-chlorobenzoic acid (62.6 mg, 0.4 mmol). The residue was purified by column chromatography (silica gel, petroleum ether/ethyl acetate = 4:1) to give **3qa** as yellow solid; yield 65%, E:Z = 97:03.

m.p.: 50-55 °C; <sup>1</sup>H NMR (500 MHz, CDCl<sub>3</sub>) δ 7.96-7.90 (m, 2H), 7.70 (t, *J* = 7.5 Hz, 1H), 7.61 (d, *J* = 7.9 Hz, 2H), 7.14 (d, *J* = 15.4 Hz, 1H), 7.02 (d, *J* = 15.4 Hz, 1H), 2.36 (s, 3H); <sup>13</sup>C NMR (126

MHz, CDCl<sub>3</sub>)  $\delta$  195.51, 141.00, 138.52, 136.06, 134.45, 129.69, 128.33, 29.12; IR: 3045, 1692, 1448, 1320, 1148, 757 cm<sup>-1</sup>.

**(E)-1-phenyl-3-tosylprop-2-en-1-one (3ab)<sup>2</sup>**

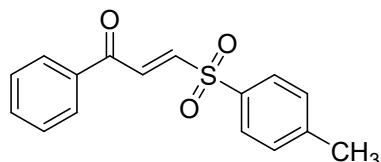

The reaction was conducted with 1-phenylprop-2-yn-1-one (**1a**, 26.0 mg, 0.2 mmol), sodium 4-methylbenzenesulfinate (**2b**, 89 mg, 0.5 mmol) and 4-chlorobenzoic acid (62.6 mg, 0.4 mmol). The residue was purified by column chromatography (silica gel, petroleum ether/ethyl acetate = 4:1) to give **3ab** as yellow solid; yield 70%, E:Z = 94:06.

m.p.: 94-100 °C; <sup>1</sup>H NMR (500 MHz, CDCl<sub>3</sub>)  $\delta$  7.98 (d, *J* = 7.8 Hz, 2H), 7.90 (d, *J* = 14.9 Hz, 1H), 7.83 (d, *J* = 8.1 Hz, 2H), 7.64 (t, *J* = 7.4 Hz, 1H), 7.52 (t, *J* = 7.7 Hz, 2H), 7.36 (dd, *J* = 15.4, 11.6 Hz, 3H), 2.45 (s, 3H); <sup>13</sup>C NMR (126 MHz, CDCl<sub>3</sub>)  $\delta$  187.77, 145.61, 142.33, 136.08, 135.70, 134.41, 132.66, 130.31, 129.07, 128.96, 128.34, 21.73; IR: 3045, 1668, 1313, 1148, 1003, 981 cm<sup>-1</sup>.

**(E)-3-((4-(tert-butyl)phenyl)sulfonyl)-1-phenylprop-2-en-1-one (3ac)**

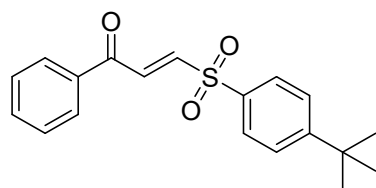

The reaction was conducted with 1-phenylprop-2-yn-1-one (**1a**, 26.0 mg, 0.2 mmol), sodium 4-(tert-butyl)benzenesulfinate (**2c**, 55.1 mg, 0.5 mmol) and 4-chlorobenzoic acid (62.6 mg, 0.4 mmol). The residue was purified by column chromatography (silica gel, petroleum ether/ethyl acetate = 5:1) to give **3ac** as white solid; yield 60%, E:Z = 89:11.

m.p.: 123-128 °C; <sup>1</sup>H NMR (500 MHz, CDCl<sub>3</sub>)  $\delta$  7.92-7.75 (m, 5H), 7.58 (t, *J* = 7.4 Hz, 1H), 7.53-7.44 (m, 4H), 7.3007.18 (m, 1H), 1.28 (s, 9H); <sup>13</sup>C NMR (126 MHz, CDCl<sub>3</sub>)  $\delta$  157.49, 141.28, 135.03, 134.46, 133.40, 131.59, 128.35, 128.04, 127.94, 127.79, 127.17, 125.69, 125.18, 34.35,

29.99; HRMS calcd. for: C<sub>19</sub>H<sub>20</sub>O<sub>3</sub>NaS [M+Na]<sup>+</sup> = 351.1031, found 351.01035; IR: 2963, 1693, 1671, 1447, 1196, 690 cm<sup>-1</sup>.

**(E)-3-((4-methoxyphenyl)sulfonyl)-1-phenylprop-2-en-1-one (3ad)<sup>4</sup>**

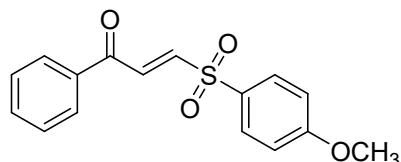

The reaction was conducted with 1-phenylprop-2-yn-1-one (**1a**, 26.0 mg, 0.2 mmol), sodium 4-methoxybenzenesulfinate (**2d**, 48.5 mg, 0.5 mmol) and 4-chlorobenzoic acid (62.6 mg, 0.4 mmol). The residue was purified by column chromatography (silica gel, petroleum ether/ethyl acetate = 4:1) to give **3ad** as yellow solid; yield 61%, E:Z = 86:14.

m.p.: 88-93 °C; <sup>1</sup>H NMR (500 MHz, CDCl<sub>3</sub>) δ 7.99 (d, *J* = 7.7 Hz, 2H), 7.89-7.86 (m, 3H), 7.65 (t, *J* = 7.4 Hz, 1H), 7.53 (t, *J* = 7.7 Hz, 2H), 7.36-7.26 (m, 1H), 7.04 (d, *J* = 8.8 Hz, 2H), 3.90 (s, 3H); <sup>13</sup>C NMR (126 MHz, CDCl<sub>3</sub>) δ 187.89, 164.38, 142.59, 136.13, 134.39, 132.09, 130.64, 129.96, 129.07, 128.97, 114.94, 55.82; IR: 3063, 1685, 1665, 1592, 1268, 762 cm<sup>-1</sup>.

**(E)-1-phenyl-3-((4-(trifluoromethoxy)phenyl)sulfonyl)prop-2-en-1-one (3ae)**

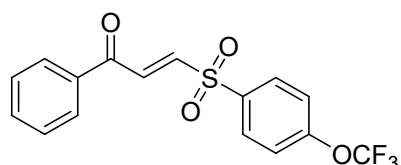

The reaction was conducted with 1-phenylprop-2-yn-1-one (**1a**, 26.0 mg, 0.2 mmol), sodium 4-(trifluoromethoxy)benzenesulfinate (**2e**, 124.0 mg, 0.5 mmol) and 4-chlorobenzoic acid (62.6 mg, 0.4 mmol). The residue was purified by column chromatography (silica gel, petroleum ether/ethyl acetate = 5:1) to give **3ae** as white solid; yield 70%, E:Z = 95:05.

m.p.: 114-120 °C; <sup>1</sup>H NMR (500 MHz, CDCl<sub>3</sub>) δ 8.03-7.95 (m, 5H), 7.68-7.65 (m, 1H), 7.54 (t, *J* = 7.8 Hz, 2H), 7.41 (d, *J* = 8.2 Hz, 2H), 7.36 (d, *J* = 14.9 Hz, 1H); <sup>13</sup>C NMR (126 MHz, CDCl<sub>3</sub>) δ 187.44, 153.48, 153.47, 141.49, 136.94, 135.91, 134.61, 133.78, 130.68, 129.15, 129.02, 121.36; <sup>19</sup>F NMR (471 MHz, CDCl<sub>3</sub>) δ -57.64; HRMS calcd. for: C<sub>16</sub>H<sub>11</sub>O<sub>4</sub>NaSF<sub>3</sub> [M+Na]<sup>+</sup> = 379.0228, found 379.0223; IR: 3052, 2320, 1670, 1270, 1151, 1006 cm<sup>-1</sup>.

**(E)-3-(mesitylsulfonyl)-1-phenylprop-2-en-1-one (3af)**

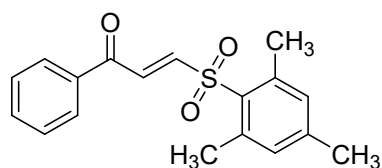

The reaction was conducted with 1-phenylprop-2-yn-1-one (**1a**, 26.0 mg, 0.2 mmol), sodium 2,4,6-trimethylbenzenesulfinate (**2f**, 103.0 mg, 0.5 mmol) and 4-chlorobenzoic acid (62.6 mg, 0.4 mmol). The residue was purified by column chromatography (silica gel, petroleum ether/ethyl acetate = 4:1) to give **3af** as white solid; yield 73%, E:Z = 91:09.

m.p.: 95-105 °C; <sup>1</sup>H NMR (500 MHz, CDCl<sub>3</sub>) δ 7.99- 7.98 (m, 2H), 7.88 (d, *J* = 14.9 Hz, 1H), 7.65 (t, *J* = 7.4 Hz, 1H), 7.53 (t, *J* = 7.8 Hz, 2H), 7.41 (d, *J* = 14.9 Hz, 1H), 6.99 (s, 2H), 2.65 (s, 6H), 2.32 (s, 3H); <sup>13</sup>C NMR (126 MHz, CDCl<sub>3</sub>) δ 187.96, 144.42, 142.53, 140.55, 136.18, 134.40, 132.53, 131.86, 131.56, 129.09, 128.94, 22.97, 21.13; HRMS calcd. for: C<sub>18</sub>H<sub>18</sub>O<sub>3</sub>NaS [M+Na]<sup>+</sup> = 337.0874, found 337.0876; IR: 3040, 1666, 1447, 1318, 1075, 694 cm<sup>-1</sup>.

**(E)-3-((4-fluorophenyl)sulfonyl)-1-phenylprop-2-en-1-one (3ag)**

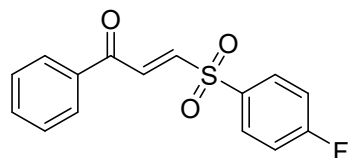

The reaction was conducted with 1-phenylprop-2-yn-1-one (**1a**, 26.0 mg, 0.2 mmol), sodium 4-fluorobenzenesulfinate (**2g**, 45.5 mg, 0.5 mmol) and 4-chlorobenzoic acid (62.6 mg, 0.4 mmol). The residue was purified by column chromatography (silica gel, petroleum ether/ethyl acetate = 4:1) to give **3ag** as yellow solid; yield 67%, E:Z = 93:07.

m.p.: 92-100 °C; <sup>1</sup>H NMR (500 MHz, CDCl<sub>3</sub>) δ 8.00-7.92 (m, 5H), 7.67 (t, *J* = 7.2 Hz, 1H), 7.54 (t, *J* = 7.7 Hz, 2H), 7.34 (d, *J* = 14.9 Hz, 1H), 7.27 (dd, *J* = 11.3, 5.2 Hz, 2H); <sup>13</sup>C NMR (126 MHz, CDCl<sub>3</sub>) δ 187.55, 166.25 (d, *J* = 258.1 Hz), 141.81, 135.96, 134.56, 133.28, 131.32, 131.24, 129.13, 129.00, 117.09 (d, *J* = 22.8 Hz); <sup>19</sup>F NMR (471 MHz, CDCl<sub>3</sub>) δ -101.93; HRMS calcd. for: C<sub>15</sub>H<sub>11</sub>O<sub>3</sub>NaSF [M+Na]<sup>+</sup> = 313.0311, found 313.0317; IR: 3054, 1668, 1590, 1322, 1146, 838 cm<sup>-1</sup>.



**(E)-3-((4-chlorophenyl)sulfonyl)-1-phenylprop-2-en-1-one (3ah)<sup>4</sup>**

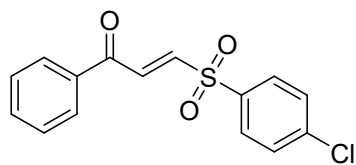

The reaction was conducted with 1-phenylprop-2-yn-1-one (**1a**, 26.0 mg, 0.2 mmol), sodium 4-chlorobenzenesulfinate (**2h**, 49.7 mg, 0.5 mmol) and 4-chlorobenzoic acid (62.6 mg, 0.4 mmol). The residue was purified by column chromatography (silica gel, petroleum ether/ethyl acetate = 4:1) to give **3ah** as yellow solid; yield 72%, E:Z = 80:20.

m.p.: 102-110 °C; <sup>1</sup>H NMR (500 MHz, CDCl<sub>3</sub>) δ 8.00-7.98 (m, 1H), 7.96-7.89 (m, 3H), 7.67 (dd, *J* = 10.6, 4.2 Hz, 1H), 7.58-7.52 (m, 4H), 7.35 (d, *J* = 14.9 Hz, 1H); <sup>13</sup>C NMR (126 MHz, CDCl<sub>3</sub>) δ 187.47, 141.59, 141.31, 137.19, 135.93, 134.58, 133.58, 130.05, 129.77, 129.14, 129.00; IR: 3054, 1672, 1449, 1317, 1141, 1083 cm<sup>-1</sup>.

**(E)-3-((4-bromophenyl)sulfonyl)-1-phenylprop-2-en-1-one (3ai)<sup>4</sup>**

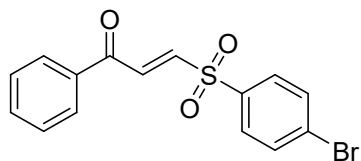

The reaction was conducted with 1-phenylprop-2-yn-1-one (**1a**, 26.0 mg, 0.2 mmol), sodium 4-bromobenzenesulfinate (**2i**, 121.5 mg, 0.5 mmol) and 4-chlorobenzoic acid (62.6 mg, 0.4 mmol). The residue was purified by column chromatography (silica gel, petroleum ether/ethyl acetate = 4:1) to give **3ai** as white solid; yield 51%, E:Z = 52:48.

m.p.: 97-105 °C; <sup>1</sup>H NMR (500 MHz, CDCl<sub>3</sub>) δ 7.91 (d, *J* = 7.6 Hz, 2H), 7.86 (d, *J* = 14.9 Hz, 1H), 7.74 (d, *J* = 8.5 Hz, 2H), 7.66 (d, *J* = 8.5 Hz, 2H), 7.58 (t, *J* = 7.4 Hz, 1H), 7.46 (t, *J* = 7.7 Hz, 2H), 7.27 (s, 1H); <sup>13</sup>C NMR (126 MHz, CDCl<sub>3</sub>) δ 186.43, 140.51, 136.73, 134.91, 133.53, 132.62, 132.00, 128.88, 128.75, 128.10, 127.96; IR: 3051, 1667, 1573, 1389, 1321, 967 cm<sup>-1</sup>.

**(E)-3-((4-iodophenyl)sulfonyl)-1-phenylprop-2-en-1-one (3aj)**

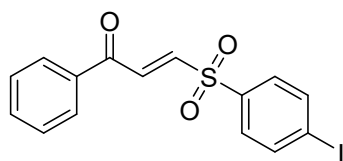

The reaction was conducted with 1-phenylprop-2-yn-1-one (**1a**, 26.0 mg, 0.2 mmol), sodium 4-iodobenzenesulfinate (**2j**, 145.1 mg, 0.5 mmol) and 4-chlorobenzoic acid (62.6 mg, 0.4 mmol). The residue was purified by column chromatography (silica gel, petroleum ether/ethyl acetate = 4:1) to give **3aj** as white solid; yield 85%, E:Z = 94:06.

m.p.: 114-124 °C; <sup>1</sup>H NMR (500 MHz, CDCl<sub>3</sub>) δ 7.99-7.91 (m, 5H), 7.66-7.64 (m, 3H), 7.53 (t, *J* = 7.8 Hz, 2H), 7.33 (d, *J* = 14.9 Hz, 1H); <sup>13</sup>C NMR (126 MHz, CDCl<sub>3</sub>) δ 187.46, 141.54, 139.00, 138.42, 135.95, 134.55, 133.65, 129.53, 129.13, 128.99, 102.58; HRMS calcd. for: C<sub>15</sub>H<sub>11</sub>O<sub>3</sub>NaSI [M+Na]<sup>+</sup> = 420.9371, found 420.9370; IR: 3041, 1669, 1563, 1320, 1142, 818 cm<sup>-1</sup>.

#### (E)-1-phenyl-3-((4-(trifluoromethyl)phenyl)sulfonyl)prop-2-en-1-one (**3ak**)

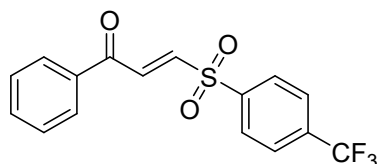

The reaction was conducted with 1-phenylprop-2-yn-1-one (**1a**, 26.0 mg, 0.2 mmol), sodium 4-(trifluoromethyl)benzenesulfinate (**2k**, 116.1 mg, 0.5 mmol) and 4-chlorobenzoic acid (62.6 mg, 0.4 mmol). The residue was purified by column chromatography (silica gel, petroleum ether/ethyl acetate = 5:1) to give **3ak** as yellow solid; yield 83%, E:Z = 80:20.

m.p.: 122-127 °C; <sup>1</sup>H NMR (500 MHz, CDCl<sub>3</sub>) δ 8.10 (d, *J* = 8.2 Hz, 2H), 8.01-7.99 (m, 3H), 7.87 (d, *J* = 8.2 Hz, 2H), 7.67 (t, *J* = 7.4 Hz, 1H), 7.55 (t, *J* = 7.7 Hz, 2H), 7.35 (d, *J* = 14.9 Hz, 1H); <sup>13</sup>C NMR (126 MHz, CDCl<sub>3</sub>) δ 187.26, 142.35, 141.05, 135.98 (q, *J* = 34.2 Hz), 135.84, 134.67, 134.49, 129.18, 129.02, 128.92, 126.82 (q, *J* = 3.6 Hz), 123.00 (q, *J* = 273.1 Hz); <sup>19</sup>F NMR (471 MHz, CDCl<sub>3</sub>) δ -63.28; HRMS calcd. for: C<sub>16</sub>H<sub>11</sub>O<sub>3</sub>NaSF<sub>3</sub> [M+H]<sup>+</sup> = 363.0279, found 363.0285; IR: 3052, 1668, 1325, 1152, 1063, 714 cm<sup>-1</sup>.

#### (E)-3-((4-nitrophenyl)sulfonyl)-1-phenylprop-2-en-1-one (**3al**, CAS: 100961-84-0)<sup>5</sup>

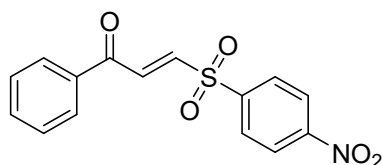

The reaction was conducted with 1-phenylprop-2-yn-1-one (**1a**, 26.0 mg, 0.2 mmol), sodium 4-nitrobenzenesulfinate (**2l**, 104.6 mg, 0.5 mmol) and 4-chlorobenzoic acid (62.6 mg, 0.4 mmol). The residue was purified by column chromatography (silica gel, petroleum ether/ethyl acetate = 3:1) to give **3al** as white solid; yield 85%, E:Z = 55:45.

m.p.: 137-146 °C; <sup>1</sup>H NMR (500 MHz, CDCl<sub>3</sub>) δ 8.36 (d, *J* = 8.7 Hz, 2H), 8.10 (d, *J* = 8.7 Hz, 2H), 7.95 (dd, *J* = 19.8, 11.2 Hz, 3H), 7.61 (t, *J* = 7.4 Hz, 1H), 7.48 (t, *J* = 7.7 Hz, 2H), 7.29 (d, *J* = 14.9 Hz, 1H); <sup>13</sup>C NMR (126 MHz, CDCl<sub>3</sub>) δ 187.05, 151.10, 144.42, 140.54, 135.71, 135.19, 134.83, 129.76, 129.24, 129.06, 124.85; IR: 3049, 1685, 1592, 1324, 1284, 853 cm<sup>-1</sup>.

#### (E)-3-((2-chlorophenyl)sulfonyl)-1-phenylprop-2-en-1-one (**3am**)

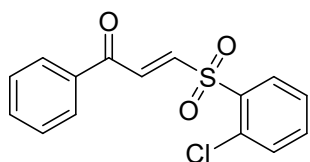

The reaction was conducted with 1-phenylprop-2-yn-1-one (**1a**, 26.0 mg, 0.2 mmol), sodium 2-chlorobenzenesulfinate (**2m**, 99.3 mg, 0.5 mmol) and 4-chlorobenzoic acid (62.6 mg, 0.4 mmol). The residue was purified by column chromatography (silica gel, petroleum ether/ethyl acetate = 5:1) to give **3am** as white solid; yield 77%, E:Z = 98:02.

m.p.: 129-134 °C; <sup>1</sup>H NMR (500 MHz, CDCl<sub>3</sub>) δ 8.21 (d, *J* = 7.2 Hz, 1H), 8.03 (dd, *J* = 24.1, 11.0 Hz, 3H), 7.67-7.50 (m, 7H); <sup>13</sup>C NMR (126 MHz, CDCl<sub>3</sub>) δ 187.57, 140.16, 136.33, 135.96, 135.91, 135.52, 134.58, 133.28, 132.16, 131.43, 129.15, 129.05, 127.78; HRMS calcd. for: C<sub>15</sub>H<sub>11</sub>O<sub>3</sub>NaS [M+Na]<sup>+</sup> = 329.0015, found 329.0021; IR: 3042, 1685, 1592, 1323, 1093, 853 cm<sup>-1</sup>.

#### (E)-3-((3-chlorophenyl)sulfonyl)-1-phenylprop-2-en-1-one (**3an**)

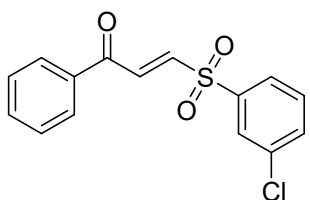

The reaction was conducted with 1-phenylprop-2-yn-1-one (**1a**, 26.0 mg, 0.2 mmol), sodium 3-chlorobenzenesulfinate (**2n**, 99.3 mg, 0.5 mmol) and 4-chlorobenzoic acid (62.6 mg, 0.4 mmol).

The residue was purified by column chromatography (silica gel, petroleum ether/ethyl acetate = 4:1) to give **3an** as viscous liquid; yield 81%, E:Z = 97:03.

$^1\text{H}$  NMR (500 MHz,  $\text{CDCl}_3$ )  $\delta$  7.99-7.93 (m, 4H), 7.85 (d,  $J = 7.9$  Hz, 1H), 7.66 (t,  $J = 8.0$  Hz, 2H), 7.56-7.52 (m, 3H), 7.35 (d,  $J = 14.9$  Hz, 1H);  $^{13}\text{C}$  NMR (126 MHz,  $\text{CDCl}_3$ )  $\delta$  187.40, 141.35, 140.51, 135.91, 134.59, 134.50, 134.00, 130.99, 129.14, 129.02, 128.29, 126.41; HRMS calcd. for:  $\text{C}_{15}\text{H}_{11}\text{O}_3\text{NaS}$   $[\text{M}+\text{Na}]^+ = 329.0015$ , found 329.0026; IR: 3034, 1669, 1579, 1324, 1154, 797.

### (E)-3-(naphthalen-2-ylsulfonyl)-1-phenylprop-2-en-1-one (**3ao**)

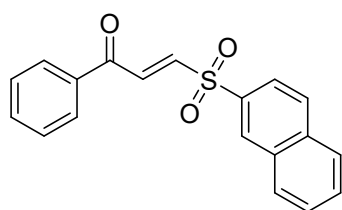

The reaction was conducted with 1-phenylprop-2-yn-1-one (**1a**, 26.0 mg, 0.2 mmol), sodium naphthalene-2-sulfinate (**2o**, 107.0 mg, 0.5 mmol) and 4-chlorobenzoic acid (62.6 mg, 0.4 mmol). The residue was purified by column chromatography (silica gel, petroleum ether/ethyl acetate = 4:1) to give **3ao** as yellow solid; yield 87%, E:Z = 95:05.

m.p.: 120-127 °C;  $^1\text{H}$  NMR (500 MHz,  $\text{CDCl}_3$ )  $\delta$  8.57 (s, 1H), 8.03-7.97 (m, 5H), 7.94 (d,  $J = 8.1$  Hz, 1H), 7.88 (dd,  $J = 8.7, 1.7$  Hz, 1H), 7.70 (dd,  $J = 11.1, 4.0$  Hz, 1H), 7.65 (t,  $J = 7.4$  Hz, 2H), 7.53 (t,  $J = 7.8$  Hz, 2H), 7.43 (d,  $J = 14.9$  Hz, 1H);  $^{13}\text{C}$  NMR (126 MHz,  $\text{CDCl}_3$ )  $\delta$  187.71, 142.05, 136.03, 135.58, 135.39, 134.50, 133.14, 132.31, 130.44, 130.08, 129.78, 129.56, 129.11, 129.01, 128.09, 127.98, 122.56; HRMS calcd. for:  $\text{C}_{16}\text{H}_{11}\text{O}_4\text{NaSF}_3$   $[\text{M}+\text{Na}]^+ = 379.0228$ , found 379.0223; IR: 3047, 1675, 1446, 1316, 1148, 767  $\text{cm}^{-1}$ .

### (E)-3-(cyclopropylsulfonyl)-1-phenylprop-2-en-1-one (**3ap**)

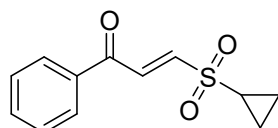

The reaction was conducted with 1-phenylprop-2-yn-1-one (**1a**, 26.0 mg, 0.2 mmol), sodium cyclopropanesulfinate (**2p**, 64.0 mg, 0.5 mmol) and 4-chlorobenzoic acid (62.6 mg, 0.4 mmol).

The residue was purified by column chromatography (silica gel, petroleum ether/ethyl acetate = 3:1) to give **3ap** as white solid; yield 85%, E:Z = 94:06.

m.p.: 64-72 °C; <sup>1</sup>H NMR (500 MHz, CDCl<sub>3</sub>) δ 8.01 (d, *J* = 7.4 Hz, 2H), 7.86 (d, *J* = 15.0 Hz, 1H), 7.66 (t, *J* = 7.3 Hz, 1H), 7.54 (t, *J* = 7.6 Hz, 2H), 7.42 (d, *J* = 15.0 Hz, 1H), 2.49-2.46 (m, 1H), 1.37-1.34 (m, 2H), 1.16-1.15 (m, 2H); <sup>13</sup>C NMR (126 MHz, CDCl<sub>3</sub>) δ 185.91, 138.42, 134.15, 132.62, 132.35, 127.23, 127.13, 28.71, 3.78; HRMS calcd. for: C<sub>12</sub>H<sub>13</sub>O<sub>3</sub>S [M+H]<sup>+</sup> = 237.0585, found 237.0589; IR: 3051, 2918, 1683, 1592, 1321, 1093 cm<sup>-1</sup>.

**(E)-7,7-dimethyl-1-(((3-oxo-3-phenylprop-1-en-1-yl)sulfonyl)methyl)bicyclo[2.2.1]heptan-2-one (3aq)**

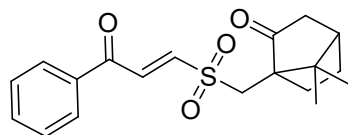

The reaction was conducted with 1-phenylprop-2-yn-1-one (**1a**, 26.0 mg, 0.2 mmol), sodium (7,7-dimethyl-2-oxobicyclo[2.2.1]heptan-1-yl)methanesulfinate (**2q**, 119.1 mg, 0.5 mmol) and 4-chlorobenzoic acid (62.6 mg, 0.4 mmol). The residue was purified by column chromatography (silica gel, petroleum ether/ethyl acetate = 4:1) to give **3aq** as yellow solid; yield 75%, E:Z = 70:30.

m.p.: 42-52 °C; <sup>1</sup>H NMR (500 MHz, CDCl<sub>3</sub>) δ 8.01 (d, *J* = 7.6 Hz, 2H), 7.81 (d, *J* = 15.0 Hz, 1H), 7.65 (t, *J* = 6.9 Hz, 1H), 7.58 (d, *J* = 15.0 Hz, 1H), 7.53 (t, *J* = 7.3 Hz, 1H), 3.53 (d, *J* = 14.9 Hz, 1H), 2.99 (d, *J* = 14.9 Hz, 1H), 2.42 (dd, *J* = 31.3, 16.7 Hz, 1H), 2.15 (s, 1H), 1.94 (d, *J* = 18.4 Hz, 1H), 1.09 (s, 2H), 0.89 (s, 2H); <sup>13</sup>C NMR (126 MHz, CDCl<sub>3</sub>) δ 214.57, 187.96, 142.01, 136.09, 134.31, 133.85, 129.04, 58.86, 52.44, 48.65, 42.56, 42.52, 27.10, 25.14, 19.74, 19.67; HRMS calcd. for: C<sub>19</sub>H<sub>22</sub>O<sub>4</sub>NaS [M+Na]<sup>+</sup> = 369.1136, found 369.1139; IR: 3055, 2960, 1744, 1680, 1423, 1130 cm<sup>-1</sup>.

**1-phenyl-3-(phenylsulfonyl)propan-1-one (5aa, CAS: 65885-28-1)<sup>6</sup>**

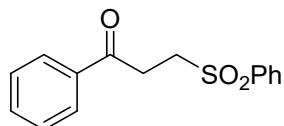

The reaction was conducted with 1-phenylprop-2-en-1-one (**4a**, 26.4 mg, 0.2 mmol), sodium benzenesulfinate (**2a**, 82.1 mg, 0.5 mmol) and 4-chlorobenzoic acid (62.6 mg, 0.4 mmol). The residue was purified by column chromatography (silica gel, petroleum ether/ethyl acetate = 4:1) to give **5aa** as white solid; yield 84%.

m.p.: 100-104 °C; <sup>1</sup>H NMR (500 MHz, CDCl<sub>3</sub>) δ 7.99-7.95 (m, 2H), 7.93-7.92 (m, 2H), 7.68 (dd, *J* = 10.6, 4.3 Hz, 1H), 7.61-7.58 (m, 3H), 7.48 (t, *J* = 7.7 Hz, 2H), 3.59-3.56 (m, 2H), 3.53-3.49 (m, 2H); <sup>13</sup>C NMR (126 MHz, CDCl<sub>3</sub>) δ 195.46, 139.07, 135.81, 133.98, 133.84, 129.46, 128.83, 128.09, 128.02, 51.05, 31.39 cm<sup>-1</sup>.

#### 1-(4-methoxyphenyl)-3-(phenylsulfonyl)propan-1-one (**5ba**)<sup>7</sup>

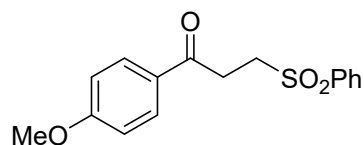

The reaction was conducted with 1-(4-methoxyphenyl)prop-2-en-1-one (**4b**, 32.4 mg, 0.2 mmol), sodium benzenesulfinate (**2a**, 82.1 mg, 0.5 mmol) and 4-chlorobenzoic acid (62.6 mg, 0.4 mmol). The residue was purified by column chromatography (silica gel, petroleum ether/ethyl acetate = 3:1) to give **5ba** as white solid; yield 98%.

m.p.: 104-108 °C; <sup>1</sup>H NMR (500 MHz, CDCl<sub>3</sub>) δ 7.95 (d, *J* = 7.4 Hz, 2H), 7.90 (d, *J* = 7.3 Hz, 2H), 7.67 (t, *J* = 7.2 Hz, 1H), 7.58 (t, *J* = 7.1 Hz, 2H), 6.93 (d, *J* = 7.3 Hz, 2H), 3.87 (s, 3H), 3.57-3.54 (m, 2H), 3.46-3.43 (m, 2H); <sup>13</sup>C NMR (126 MHz, CDCl<sub>3</sub>) δ 193.88, 164.01, 139.08, 133.95, 130.42, 129.44, 128.87, 128.01, 113.96, 55.57, 51.17, 30.95; <sup>13</sup>C NMR (126 MHz, CDCl<sub>3</sub>) δ 193.88, 164.01, 139.08, 133.95, 130.42, 129.44, 128.87, 128.01, 113.96, 55.57, 51.17, 30.95; IR: 3434, 3017, 1678, 1602, 1254, 1110 cm<sup>-1</sup>.

#### 1-([1,1'-biphenyl]-4-yl)-3-(phenylsulfonyl)propan-1-one (**5ca**, Cas: 1375496-17-5)<sup>7</sup>

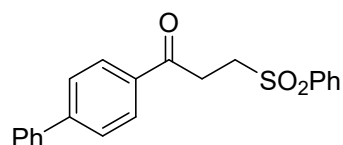

The reaction was conducted with 1-([1,1'-biphenyl]-4-yl)prop-2-en-1-one (**4c**, 41.7 mg, 0.2 mmol), sodium benzenesulfinate (**2a**, 82.1 mg, 0.5 mmol) and 4-chlorobenzoic acid (62.6 mg, 0.4 mmol).

The residue was purified by column chromatography (silica gel, petroleum ether/ethyl acetate = 4:1) to give **5ca** as white solid; yield 88%.

m.p.: 170-174 °C; <sup>1</sup>H NMR (500 MHz, CDCl<sub>3</sub>) δ 7.92-7.89 (m, 3H), 7.62-7.58 (m, 3H), 7.55-7.50 (m, 3H), 7.40 (t, *J* = 7.4 Hz, 2H), 7.34 (d, *J* = 7.3 Hz, 1H), 3.51-3.45 (m, 4H); <sup>13</sup>C NMR (126 MHz, CDCl<sub>3</sub>) δ 193.99, 145.45, 138.54, 138.07, 133.45, 132.94, 128.43, 127.99, 127.66, 127.42, 126.99, 126.38, 126.25, 50.05, 30.36; IR: 2991, 1681, 1604, 1262, 1143, 802 cm<sup>-1</sup>.

#### 1-(4-fluorophenyl)-3-(phenylsulfonyl)propan-1-one (**5da**)<sup>7</sup>

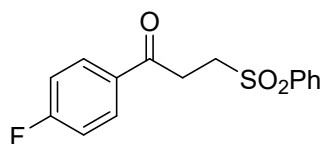

The reaction was conducted with 1-(4-fluorophenyl)prop-2-en-1-one (**4d**, 30.0 mg, 0.2 mmol), sodium benzenesulfinate (**2a**, 82.1 mg, 0.5 mmol) and 4-chlorobenzoic acid (62.6 mg, 0.4 mmol). The residue was purified by column chromatography (silica gel, petroleum ether/ethyl acetate = 4:1) to give **5da** as white solid; yield 97%.

m.p.: 132-138°C; <sup>1</sup>H NMR (500 MHz, CDCl<sub>3</sub>) δ 7.97-7.95 (m, 4H), 7.68 (t, *J* = 7.4 Hz, 1H), 7.59 (t, *J* = 7.6 Hz, 2H), 7.14 (t, *J* = 8.5 Hz, 2H), 3.56 (d, *J* = 7.3 Hz, 2H), 3.48 (d, *J* = 7.2 Hz, 2H); <sup>13</sup>C NMR (126 MHz, CDCl<sub>3</sub>) δ 193.89, 166.11 (d, *J* = 256.3 Hz), 139.02, 134.02, 132.27 (d, *J* = 2.8 Hz), 130.81 (d, *J* = 9.3 Hz), 129.48, 128.00, 116.09, 115.91, 50.97, 31.27; <sup>19</sup>F NMR (471 MHz, CDCl<sub>3</sub>) δ -103.59; IR: 2926, 1680, 1600, 1306, 1152, 843 cm<sup>-1</sup>.

#### 1-(4-chlorophenyl)-3-(phenylsulfonyl)propan-1-one (**5ea**)<sup>7</sup>

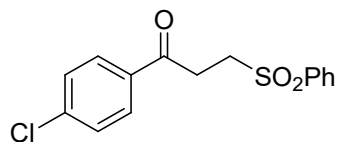

The reaction was conducted with 1-(4-chlorophenyl)prop-2-en-1-one (**4e**, 33.3 mg, 0.2 mmol), sodium benzenesulfinate (**2a**, 82.1 mg, 0.5 mmol) and 4-chlorobenzoic acid (62.6 mg, 0.4 mmol). The residue was purified by column chromatography (silica gel, petroleum ether/ethyl acetate = 4:1) to give **5ea** as white solid; yield 87%.

m.p.: 144-154 °C; <sup>1</sup>H NMR (500 MHz, CDCl<sub>3</sub>) δ 7.95 (d, *J* = 7.5 Hz, 2H), 7.87 (d, *J* = 8.3 Hz, 2H), 7.68 (t, *J* = 7.1 Hz, 1H), 7.59 (t, *J* = 7.5 Hz, 2H), 7.45 (d, *J* = 8.2 Hz, 2H), 3.57-3.55 (m, 2H), 3.49-3.46 (m, 2H); <sup>13</sup>C NMR (126 MHz, CDCl<sub>3</sub>) δ 194.31, 140.37, 138.99, 134.10, 134.05, 131.55, 129.50, 129.18, 128.00, 50.92, 31.34; IR: 2926, 1683, 1590, 1306, 1151, 744 cm<sup>-1</sup>.

#### 4-(3-(phenylsulfonyl)propanoyl)benzonitrile (**5fa**)<sup>8</sup>

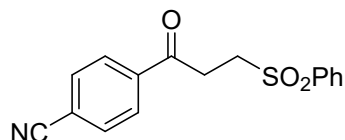

The reaction was conducted with 4-acryloylbenzonitrile (**4f**, 31.4 mg, 0.2 mmol), sodium benzenesulfinate (**2a**, 82.1 mg, 0.5 mmol) and 4-chlorobenzoic acid (62.6 mg, 0.4 mmol). The residue was purified by column chromatography (silica gel, petroleum ether/ethyl acetate = 2:1) to give **5fa** as white solid; yield 95%.

m.p.: 140-144 °C; <sup>1</sup>H NMR (500 MHz, CDCl<sub>3</sub>) δ 7.95 (d, *J* = 8.3 Hz, 2H), 7.87 (d, *J* = 7.8 Hz, 2H), 7.71 (d, *J* = 8.2 Hz, 2H), 7.62 (t, *J* = 7.4 Hz, 1H), 7.52 (t, *J* = 7.7 Hz, 2H), 3.49 (d, *J* = 6.5 Hz, 2H), 3.45 (d, *J* = 7.0 Hz, 2H); <sup>13</sup>C NMR (126 MHz, CDCl<sub>3</sub>) δ 193.32, 137.89, 137.65, 133.12, 131.68, 128.52, 127.51, 126.95, 116.67, 116.03, 49.70, 30.69; IR: 2962, 2235, 1691, 1298, 1152, 845 cm<sup>-1</sup>.

#### 1-(phenylsulfonyl)octan-3-one (**5ga**, CAS: 82972-50-7)<sup>9</sup>

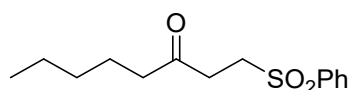

The reaction was conducted with oct-1-en-3-one (**4g**, 25.2 mg, 0.2 mmol), sodium benzenesulfinate (**2a**, 82.1 mg, 0.5 mmol) and 4-chlorobenzoic acid (62.6 mg, 0.4 mmol). The residue was purified by column chromatography (silica gel, petroleum ether/ethyl acetate = 4:1) to give **5ga** as white solid; yield 95%.

m.p.: 34-37 °C; <sup>1</sup>H NMR (500 MHz, CDCl<sub>3</sub>) δ 7.91 (d, *J* = 7.4 Hz, 2H), 7.67 (t, *J* = 7.4 Hz, 1H), 7.58 (t, *J* = 7.7 Hz, 2H), 3.40-3.37 (m, 2H), 2.91-2.88 (m, 2H), 2.42 (t, *J* = 7.4 Hz, 1H), 1.56-1.51 (dm, 2H), 1.31-1.22 (m, 4H), 0.87 (t, *J* = 7.1 Hz, 3H); <sup>13</sup>C NMR (126 MHz, CDCl<sub>3</sub>) δ 206.25, 139.06, 133.89, 129.39, 127.96, 50.56, 42.81, 34.88, 31.22, 23.35, 22.34, 13.83; IR: 2991, 1681, 1604, 1262, 1143, 802 cm<sup>-1</sup>.



### 1-phenyl-3-tosylpropan-1-one (**5ab**, CAS: 52481-46-6)<sup>2</sup>

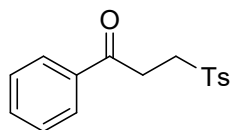

The reaction was conducted with 1-phenylprop-2-en-1-one (**4a**, 26.0 mg, 0.2 mmol), sodium 4-methylbenzenesulfinate (**2b**, 89.1 mg, 0.5 mmol) and 4-chlorobenzoic acid (62.6 mg, 0.4 mmol). The residue was purified by column chromatography (silica gel, petroleum ether/ethyl acetate = 4:1) to give **5ab** as yellow solid; yield 95%.

m.p.: 130-138 °C; <sup>1</sup>H NMR (500 MHz, CDCl<sub>3</sub>) δ 7.92 (d, *J* = 7.5 Hz, 2H), 7.83 (d, *J* = 8.1 Hz, 2H), 7.59 (t, *J* = 7.3 Hz, 1H), 7.47 (t, *J* = 7.6 Hz, 2H), 7.37 (d, *J* = 7.9 Hz, 2H), 3.54 (d, *J* = 7.4 Hz, 2H), 3.49 (d, *J* = 7.6 Hz, 2H), 2.45 (s, 3H); <sup>13</sup>C NMR (126 MHz, CDCl<sub>3</sub>) δ 195.58, 145.04, 136.01, 135.81, 133.82, 130.08, 128.82, 128.09, 128.05, 51.11, 31.53, 21.70; IR: 3052, 2939, 1681, 1316, 1147, 852 cm<sup>-1</sup>.

### 3-(cyclopropylsulfonyl)-1-phenylpropan-1-one (**5ap**)

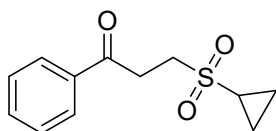

The reaction was conducted with 1-phenylprop-2-en-1-one (**4a**, 26.0 mg, 0.2 mmol), sodium cyclopropanesulfinate (**2p**, 64.1 mg, 0.5 mmol) and 4-chlorobenzoic acid (62.6 mg, 0.4 mmol). The residue was purified by column chromatography (silica gel, petroleum ether/ethyl acetate = 4:1) to give **5ap** as white solid; yield 95%.

m.p.: 97-100 °C; <sup>1</sup>H NMR (500 MHz, CDCl<sub>3</sub>) δ 7.99 (d, *J* = 7.9 Hz, 2H), 7.61 (t, *J* = 7.4 Hz, 1H), 7.50 (t, *J* = 7.6 Hz, 2H), 3.60-3.52 (m, 4H), 2.52-2.43 (m, 1H), 1.29-2.6 (m, 2H), 1.09-1.05 (m, 2H); <sup>13</sup>C NMR (126 MHz, CDCl<sub>3</sub>) δ 195.83, 135.86, 133.85, 128.86, 128.13, 48.43, 31.02, 29.98, 4.89; HRMS calcd. for: C<sub>12</sub>H<sub>14</sub>O<sub>3</sub>NaS [M+Na]<sup>+</sup> = 261.0561, found 261.0562; IR: 3056, 2984, 1676, 1597, 1278, 1117 cm<sup>-1</sup>

### 1-(4-chlorophenyl)-4,4,4-trifluoro-3-(phenylsulfonyl)butan-1-one (**5ha**)

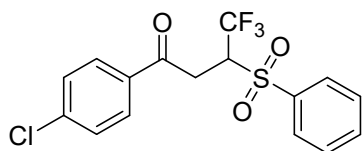

The reaction was conducted with (E)-1-(4-chlorophenyl)-4,4,4-trifluorobut-2-en-1-one (**4h**, 46.9 mg, 0.2 mmol), sodium benzenesulfinate (**2a**, 82.1 mg, 0.5 mmol) and 4-chlorobenzoic acid (62.6 mg, 0.4 mmol). The residue was purified by column chromatography (silica gel, petroleum ether/ethyl acetate = 4:1) to give **5ga** as white solid; yield 60%.

m.p.: 123-126 °C; <sup>1</sup>H NMR (500 MHz, CDCl<sub>3</sub>) δ 7.97 (dd, *J* = 16.6, 8.1 Hz, 4H), 7.72 (t, *J* = 7.4 Hz, 1H), 7.61 (t, *J* = 7.8 Hz, 2H), 7.49 (d, *J* = 8.5 Hz, 2H), 4.94-4.91 (m, 1H), 4.04 (dd, *J* = 18.4, 7.0 Hz, 1H), 3.34 (dd, *J* = 18.4, 4.1 Hz, 1H); <sup>13</sup>C NMR (126 MHz, CDCl<sub>3</sub>) δ 191.81, 140.76, 138.36, 134.75, 133.68, 129.79, 129.49, 129.29, 128.92, 123.18 (q, *J* = 280.2 Hz), 62.09 (q, *J* = 28.7 Hz), 32.55; <sup>19</sup>F NMR (471 MHz, CDCl<sub>3</sub>) δ -65.19; HRMS calcd. for: C<sub>16</sub>H<sub>12</sub>O<sub>3</sub>NaSClF<sub>3</sub> [M+Na]<sup>+</sup> = 399.0045, found 399.0044; IR: 2950, 1695, 1589, 1324, 1148, 843 cm<sup>-1</sup>

### 1,3-diphenyl-3-(phenylsulfonyl)propan-1-one (**5ia**, CAS: 300376-97-0)<sup>10</sup>

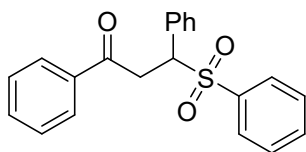

The reaction was conducted with (E)-chalcone (**4i**, 41.7 mg, 0.2 mmol), sodium benzenesulfinate (**2a**, 82.1 mg, 0.5 mmol) and 4-chlorobenzoic acid (62.6 mg, 0.4 mmol). The residue was purified by column chromatography (silica gel, petroleum ether/ethyl acetate = 4:1) to give **5ia** as white solid; yield 61%.

m.p.: 154-158 °C; <sup>1</sup>H NMR (500 MHz, CDCl<sub>3</sub>) δ 7.88 (dd, *J* = 23.7, 11.2 Hz, 1H), 7.74 (d, *J* = 8.5 Hz, 1H), 7.66 (d, *J* = 8.5 Hz, 1H), 7.58 (t, *J* = 7.4 Hz, 1H), 7.46 (t, *J* = 7.7 Hz, 1H), 7.25 (d, *J* = 15.0 Hz, 1H); <sup>13</sup>C NMR (126 MHz, CDCl<sub>3</sub>) δ 186.43, 140.51, 136.73, 134.91, 133.53, 132.62, 132.00, 128.88, 128.75, 128.10, 127.96; IR: 3059, 1685, 1592, 1306, 1094, 762 cm<sup>-1</sup>

### 1,3-diphenyl-3-tosylpropan-1-one (**5ja**)<sup>13</sup>

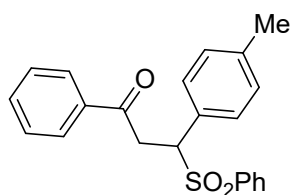

The reaction was conducted with (E)-1-phenyl-3-(p-tolyl)prop-2-en-1-one (**4j**, 22.3 mg, 0.1 mmol), sodium benzenesulfinate (**2a**, 41.0 mg, 0.25 mmol) and 4-chlorobenzoic acid (31.3 mg, 0.2 mmol). The residue was purified by column chromatography (silica gel, petroleum ether/ethyl acetate = 4:1) to give **5ja** as white solid; yield 57%.

m.p.: 160-164 °C; <sup>1</sup>H NMR (500 MHz, CDCl<sub>3</sub>) δ 7.93 (d, *J* = 7.7 Hz, 2H), 7.56 (dd, *J* = 13.5, 7.0 Hz, 4H), 7.45 (t, *J* = 7.7 Hz, 2H), 7.39 (t, *J* = 7.7 Hz, 2H), 7.07 (d, *J* = 8.0 Hz, 2H), 7.00 (d, *J* = 7.9 Hz, 2H), 4.91 (dd, *J* = 9.7, 3.4 Hz, 1H), 4.09 (dd, *J* = 17.8, 3.5 Hz, 1H), 3.91 (dd, *J* = 17.8, 9.8 Hz, 1H), 2.27 (s, 2H), 2.27 (s, 3H); <sup>13</sup>C NMR (126 MHz, CDCl<sub>3</sub>) δ 194.94, 138.75, 137.08, 136.19, 133.67, 133.66, 129.73, 129.62, 129.34, 129.21, 129.06, 128.74, 128.15, 66.22, 36.97, 21.17.

#### Ethyl 5-benzoyl-4-(phenylsulfonyl)cyclopent-1-ene-1-carboxylate (**6aa**)

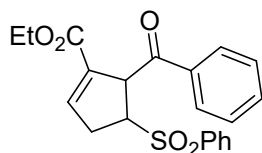

m.p.: 104-117 °C; <sup>1</sup>H NMR (500 MHz, CDCl<sub>3</sub>) δ 8.04 (d, *J* = 8.4 Hz, 1H), 7.96 (d, *J* = 7.7 Hz, 1H), 7.83 (d, *J* = 7.7 Hz, 1H), 7.58-7.52 (m, 2H), 7.46-7.41 (m, 5H), 6.87 (d, *J* = 1.6 Hz, 1H), 5.35 (s, 1H), 4.16-4.12 (m, 1H), 4.02 (q, *J* = 7.1 Hz, 2H), 3.13 (d, *J* = 19.3 Hz, 1H), 2.98 (dd, *J* = 19.3, 9.0 Hz, 1H), 1.02 (t, *J* = 7.1 Hz, 3H); <sup>13</sup>C NMR (126 MHz, CDCl<sub>3</sub>) δ 199.28, 162.78, 142.91, 137.12, 135.99, 135.64, 134.16, 133.62, 129.38, 129.09, 128.57, 128.53, 66.91, 60.91, 51.02, 34.15, 13.81; HRMS (ESI) *m/z* calcd. for C<sub>21</sub>H<sub>20</sub>NaO<sub>5</sub>S[M+Na]<sup>+</sup> = 407.0929, found 407.0918; IR: 2964, 1679, 1644, 1282, 1146, 747 cm<sup>-1</sup>

#### Ethyl 5-([1,1'-biphenyl]-4-carbonyl)-4-(phenylsulfonyl)cyclopent-1-ene-1-carboxylate (**6ea**)

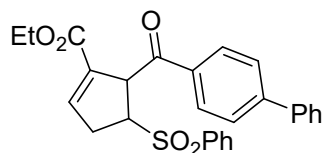

m.p.: 164-171 °C; <sup>1</sup>H NMR (500 MHz, CDCl<sub>3</sub>) δ 8.04 (d, *J* = 8.3 Hz, 2H), 7.85 (d, *J* = 7.8 Hz, 2H), 7.65 (t, *J* = 7.7 Hz, 4H), 7.53-7.48 (m, 3H), 7.46-7.42 (m, 3H), 6.88 (d, *J* = 1.7 Hz, 1H), 5.39 (d, *J* = 2.4 Hz, 1H), 4.20-4.15 (m, 1H), 4.07-4.02 (m, 2H), 3.16-3.12 (m, 1H), 3.03-2.97 (m, 1H), 1.06 (t, *J* = 7.1 Hz, 2H); <sup>13</sup>C NMR (126 MHz, CDCl<sub>3</sub>) δ 198.88, 162.86, 146.23, 142.87, 139.80, 137.19, 135.70, 134.70, 134.15, 129.72, 129.41, 129.04, 128.59, 128.39, 127.30, 127.16, 66.96, 60.96, 51.05, 34.20, 13.89; HRMS (ESI) *m/z* calcd. for C<sub>27</sub>H<sub>24</sub>O<sub>5</sub>S [M+H]<sup>+</sup> = 461.1423, found 461.1445; IR: 2972, 1710, 1649, 1279, 1140, 760 cm<sup>-1</sup>

**Ethyl 5-(4-fluorobenzoyl)-4-(phenylsulfonyl)cyclopent-1-ene-1-carboxylate (6fa)**

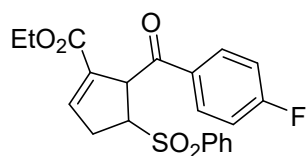

m.p.: 115-124 °C; <sup>1</sup>H NMR (500 MHz, CDCl<sub>3</sub>) δ 8.03 (dd, *J* = 8.2, 5.6 Hz, 2H), 7.83 (d, *J* = 7.7 Hz, 2H), 7.57 (t, *J* = 7.4 Hz, 1H), 7.45 (t, *J* = 7.7 Hz, 2H), 7.11 (t, *J* = 8.5 Hz, 2H), 6.88 (s, 1H), 5.32-5.30 (m, 1H), 4.16-4.12 (m, 1H), 4.06-4.01 (m, 2H), 3.11 (d, *J* = 19.3 Hz, 1H), 2.97 (dd, *J* = 19.3, 9.0 Hz, 1H), 1.06 (t, *J* = 7.1 Hz, 3H); <sup>13</sup>C NMR (126 MHz, CDCl<sub>3</sub>) δ 197.77, 163.90 (d, *J* = 288.8 Hz), 167.08, 142.93, 137.06, 135.46, 134.20, 132.44 (d, *J* = 2.7 Hz), 131.88, 131.81, 129.40, 128.52, 115.66 (d, *J* = 22.0 Hz), 66.83, 60.95, 50.86, 34.21, 13.85; <sup>19</sup>F NMR (471 MHz, CDCl<sub>3</sub>) δ -104.09; HRMS (ESI) *m/z* calcd. for C<sub>21</sub>H<sub>19</sub>FN<sub>2</sub>O<sub>5</sub>S [M+Na]<sup>+</sup> = 425.0835, found 425.0824; IR: 2965, 1715, 1597, 1279, 1146, 745 cm<sup>-1</sup>

**3-phenyl-1H-pyrazole (6b, CAS: 2458-26-6)<sup>11</sup>**

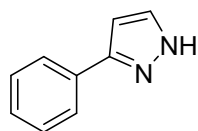

m.p.: 38-47 °C; <sup>1</sup>H NMR (500 MHz, CDCl<sub>3</sub>) δ 10.54 (s, 1H), 7.75 (d, *J* = 7.4 Hz, 2H), 7.60 (s, 1H), 7.44-7.38 (m, 2H), 7.32 (t, *J* = 7.3 Hz, 1H), 6.61 (s, 1H); <sup>13</sup>C NMR (126 MHz, CDCl<sub>3</sub>) δ 132.03, 131.44, 128.82, 128.69, 128.12, 125.88, 102.76; IR: 2924, 1594, 1456, 1093, 955, 759 cm<sup>-1</sup>.

## 2-cyclopropyl-4-(4-fluorophenyl)-3-(1H-pyrazol-3-yl)quinoline (6c)

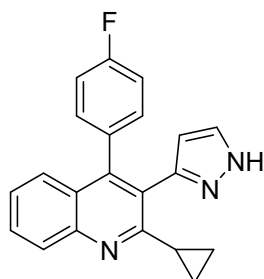

m.p.: 93-112 °C;  $^1\text{H}$  NMR (500 MHz,  $\text{CDCl}_3$ )  $\delta$  7.98 (d,  $J = 8.4$  Hz, 1H), 7.63 (dd,  $J = 11.2, 4.0$  Hz, 1H), 7.41 (d,  $J = 8.3$  Hz, 1H), 7.37-7.32 (m, 2H), 7.08-7.05 (m, 2H), 6.98-6.94 (m, 2H), 6.07 (s, 1H), 2.04-2.01 (m, 1H), 1.29 (d,  $J = 2.2$  Hz, 3H), 0.87 (dd,  $J = 4.8, 3.1$  Hz, 2H);  $^{13}\text{C}$  NMR (126 MHz,  $\text{CDCl}_3$ )  $\delta$  163.07, 161.67, 161.10, 147.32 (d,  $J = 115.8$  Hz), 133.37, 132.60 (d,  $J = 3.2$  Hz), 131.37 (d,  $J = 7.9$  Hz), 129.52, 128.97, 126.25, 125.58, 125.50, 124.77, 114.99, 114.82, 107.79, 15.53, 10.98;  $^{19}\text{F}$  NMR (471 MHz,  $\text{CDCl}_3$ )  $\delta$  -114.1; HRMS calcd. for:  $\text{C}_{21}\text{H}_{17}\text{N}_3\text{F}$   $[\text{M}+\text{H}]^+ = 330.1407$ , found 330.1414; IR: 2929, 1605, 1513, 1132, 922, 841  $\text{cm}^{-1}$ .

## 5. X-ray Crystal Structure for 6fa

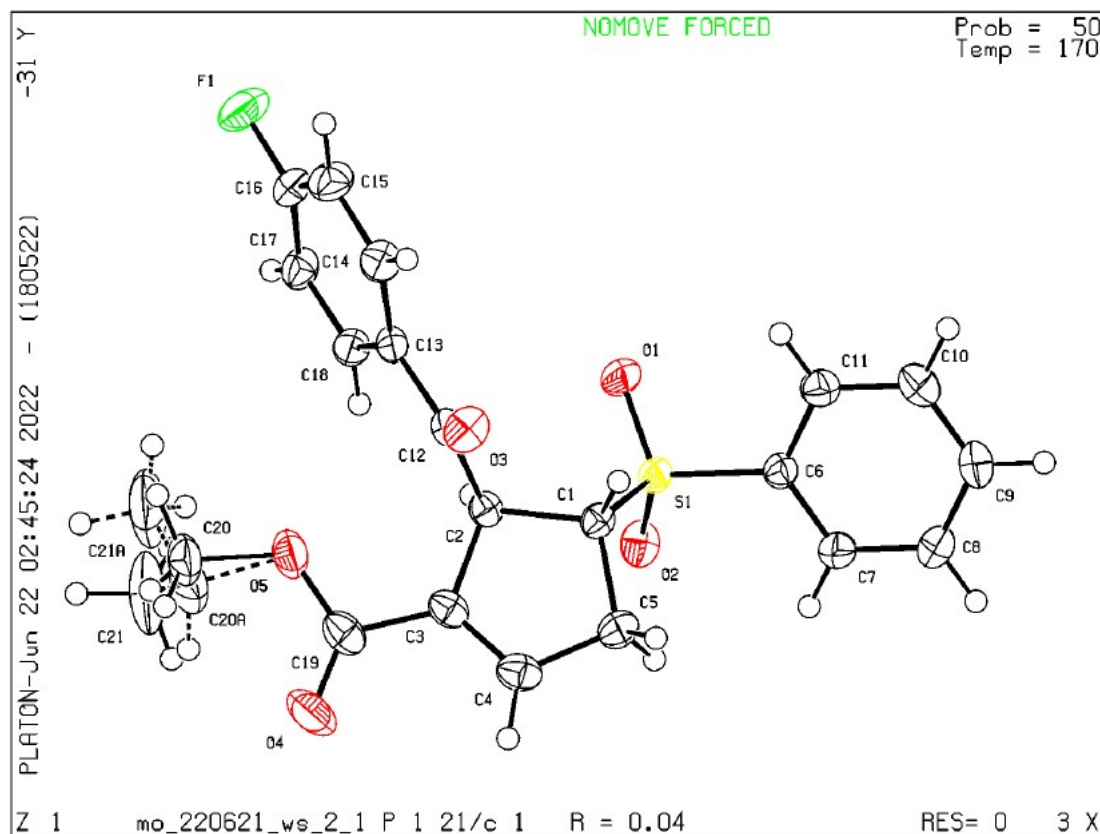

## 6. Reference

1. Zheng, M.; Wu, F.;Zheng, M., Wu, F., Chen, K., Zhu, S. *Org. Lett.* **2016**, *18*, 3554-3557.
2. Fang, G.; Liu, J.; Shang, W.; Liu, Q., Bi, X. *Chem. Asian J.*, **2016**, *11*, 3334.
3. Cavalchi, B.; Landini, D.; Montanari, F. *Journal of the Chemical Society C: Organic*, **1969**, *1204*, 1208.
4. Reddy, D.; Babu, N.; Sumathi, P. *Synthesis* **1999**, *3*, 491.
5. Montanari, A. *Bollettino Scientifico della Facolta di Chimica Industriale di Bologna* **1958**, *16*, 140
6. Chen, X.-L.; Wu, C.-Y.; Ma, J.-T.; Zhuang, S.-Y.; Yu, Z.-C.; Wu, Y.-D.; Wu, A.-X. *Org. Lett.* **2022**, *24*, 223.
7. Bhunia, A.; Yetra, S.; Bhojgude, S.; Biju, A. *Org. Lett.* **2012**, *14*, 2830.
8. Balletti, M.; De Pedro B.; Mazzarella, D.; Melchiorre, P. *Chem. Sci.* **2020**, *11*, 6312.
9. Shapiro, N.; Kramer, M.; Goldberg, I.; Vigalok, A. *Green Chem.* **2010**, *12*, 582.
10. Chen; Y.; Lam, Y.; Lai, Y. *Org. Lett.* **2003**, *5*, 1067.
11. Yu, Y.; Huang, W.; Chen, Y.; Gao, B.; Wu, W.; Jiang, H. *Green Chem.* **2016**, *18*, 6445.
12. Shi, Y.-L.; Shi, M. *Org. Biomol. Chem.* **2005**, *3*, 1620.
13. Xue, L.; Liu, Y.; Qin, W.; Yan, H. *Chinese chem. lett.* **2018**, *29*, 1215.

## 7. $^1\text{H}$ , $^{13}\text{C}$ , $^{19}\text{F}$ NMR spectra of compounds.

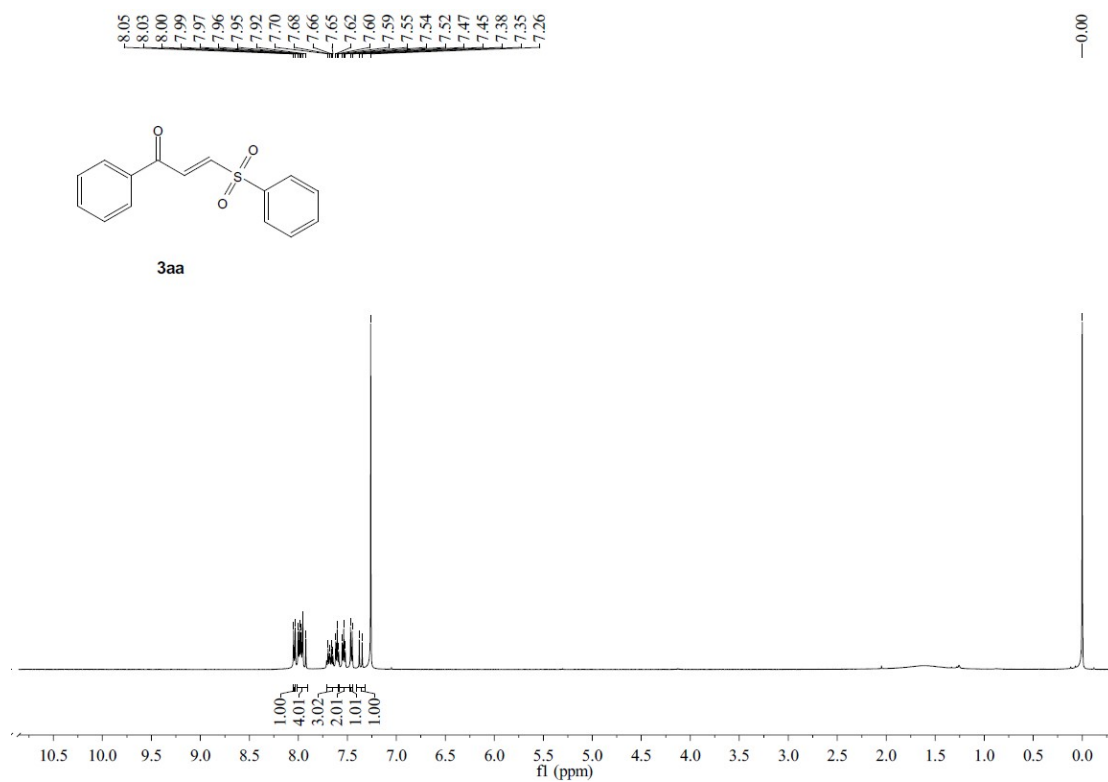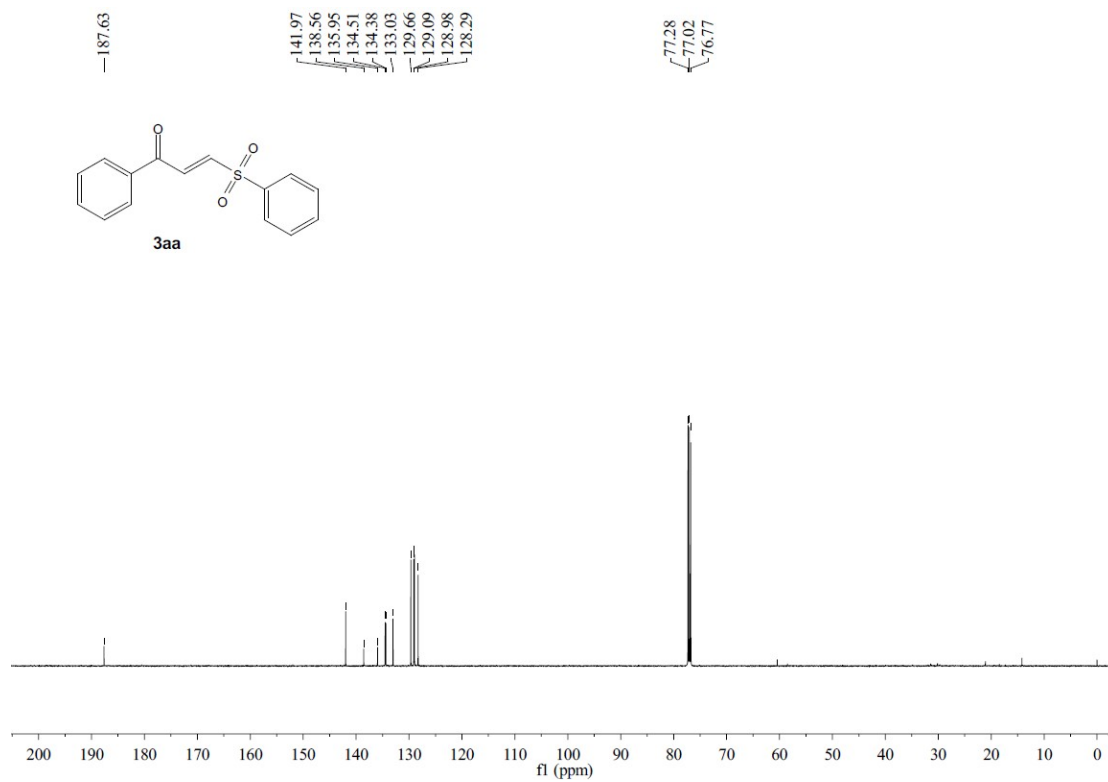

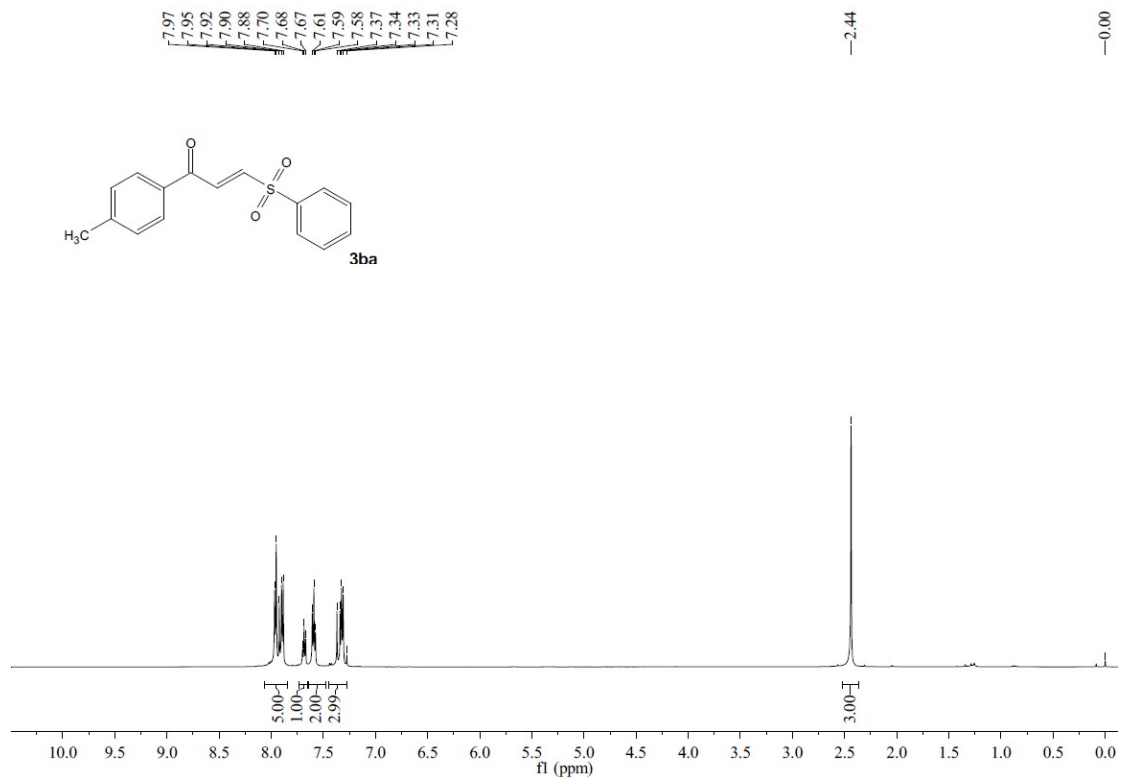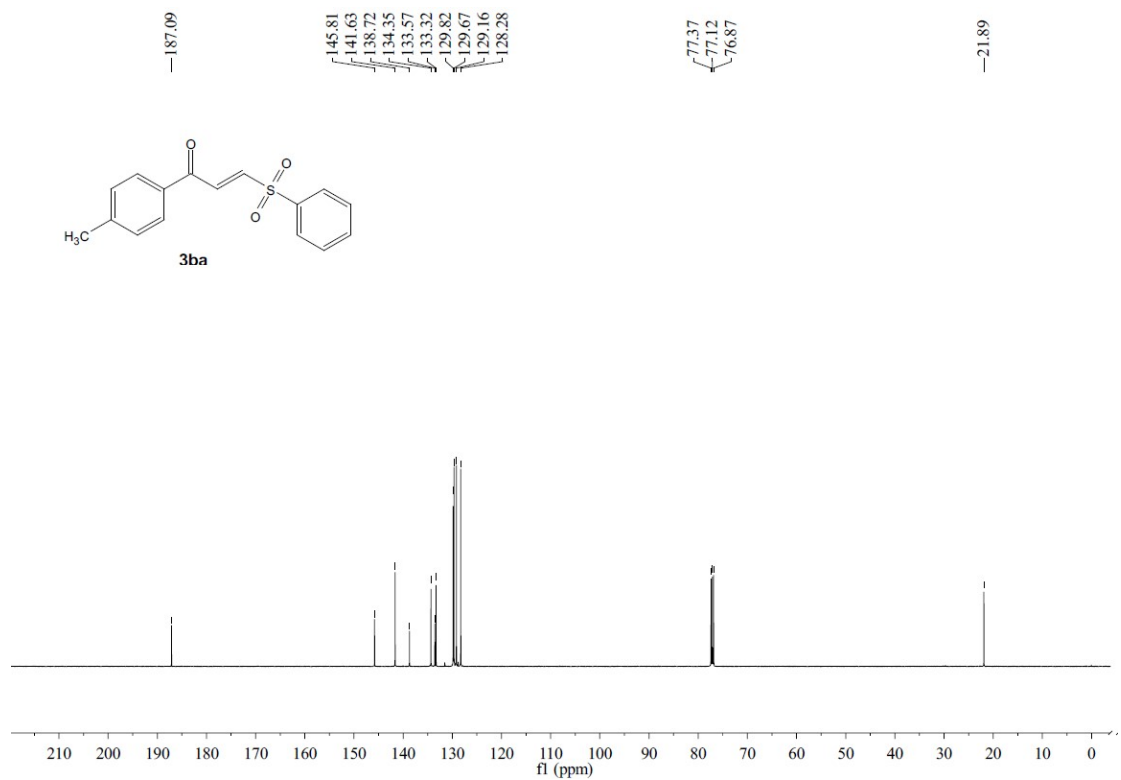



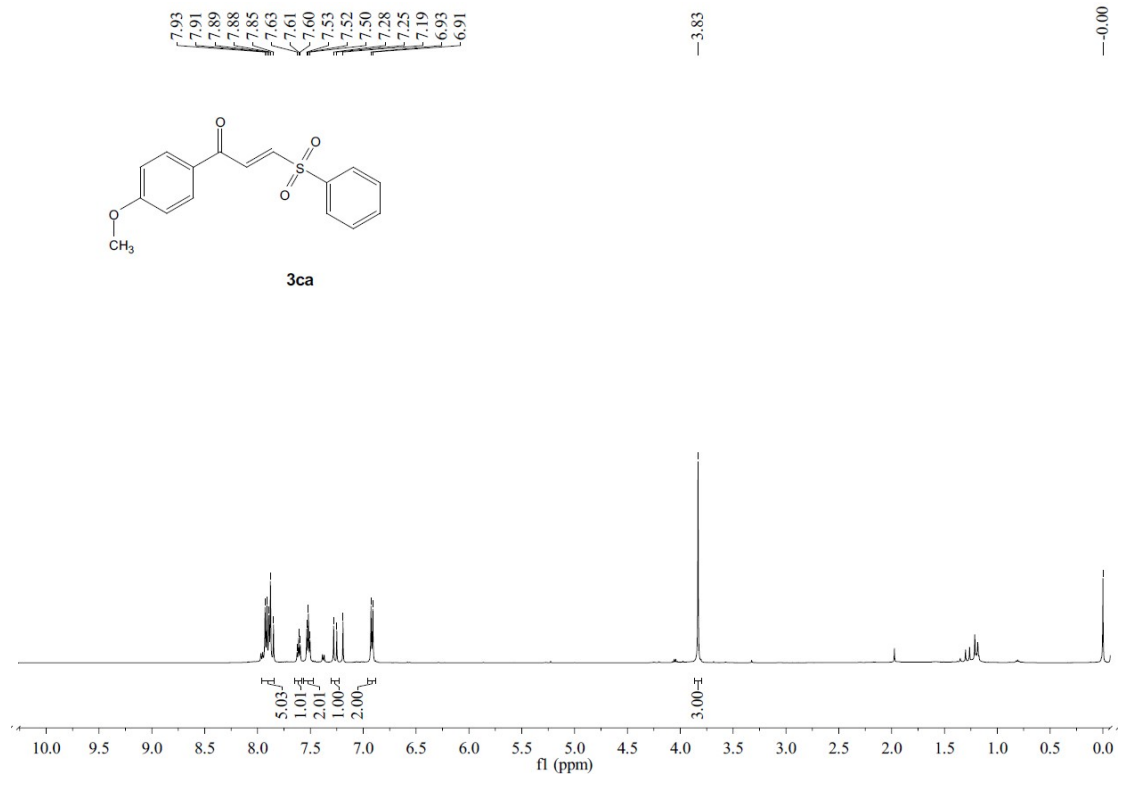

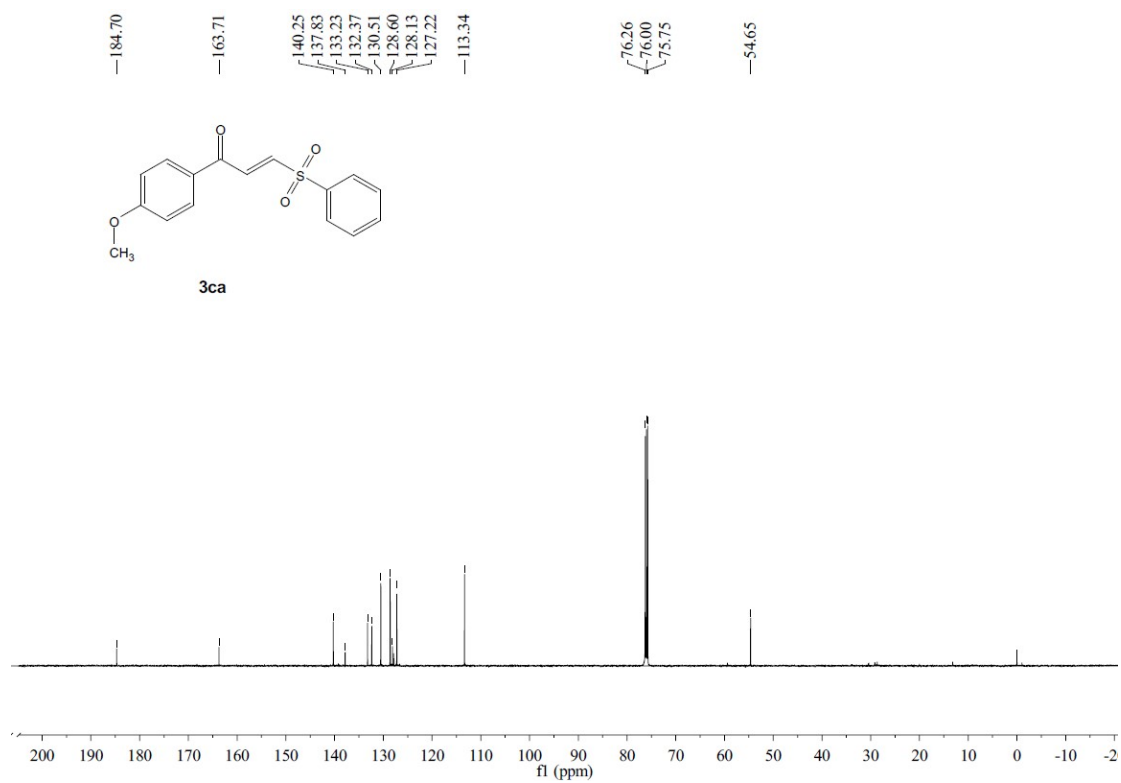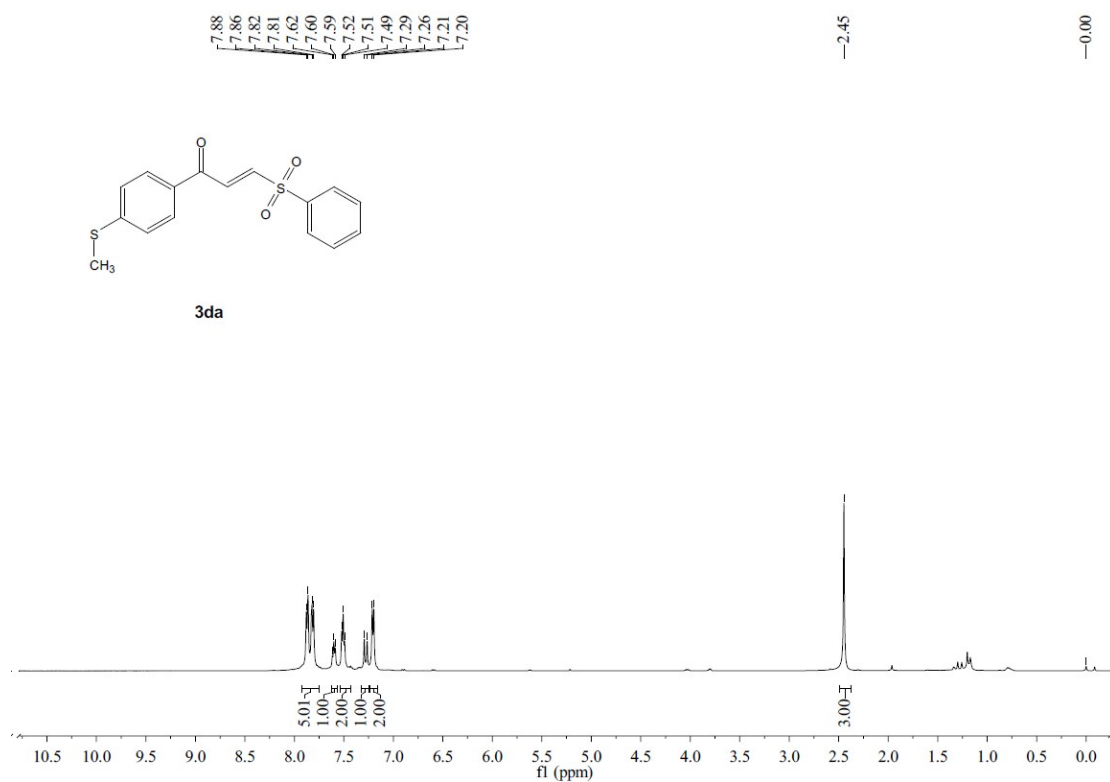

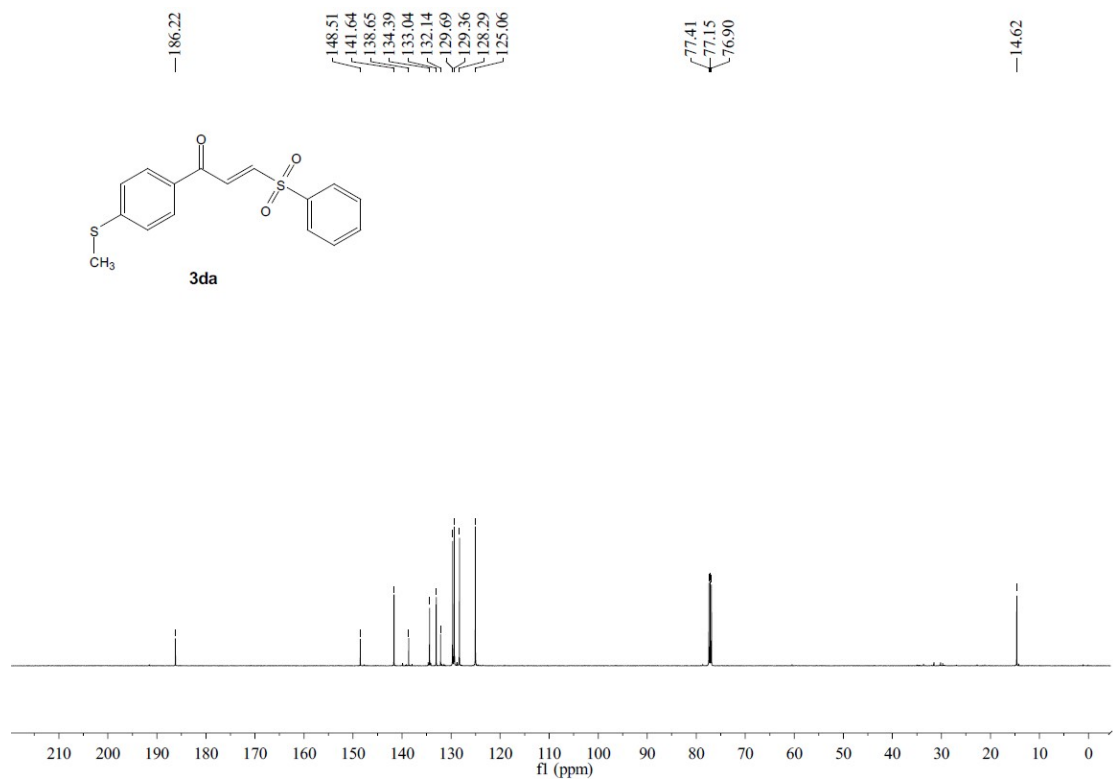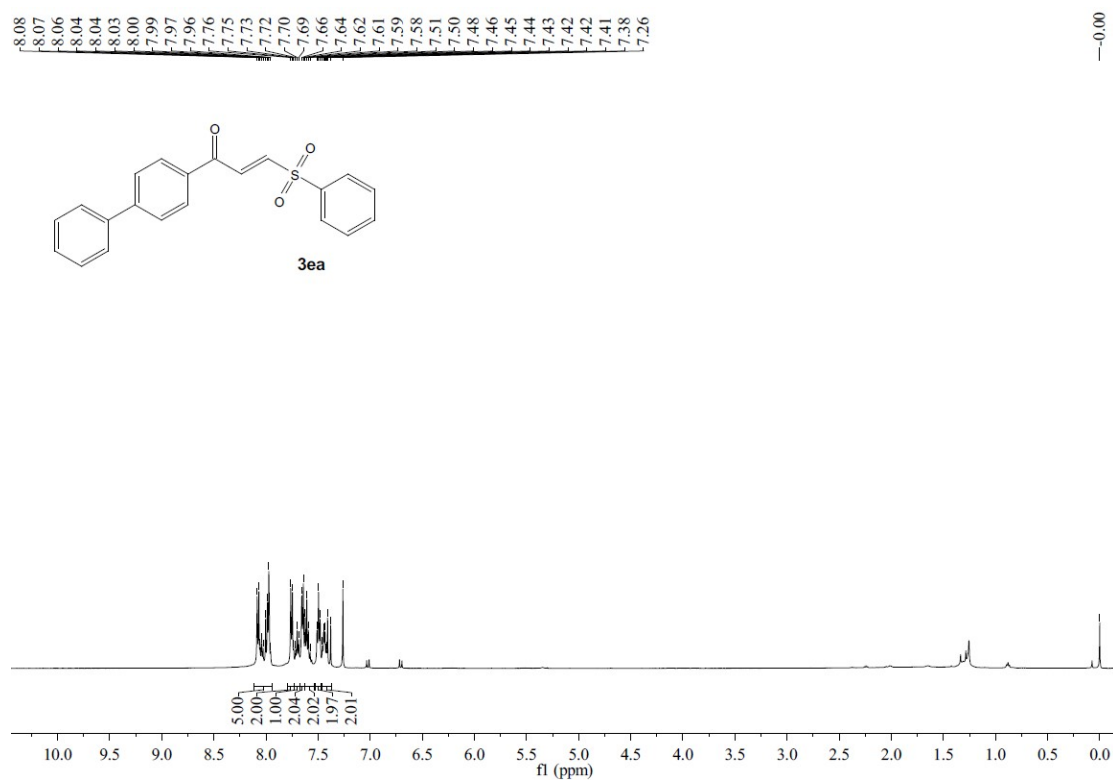

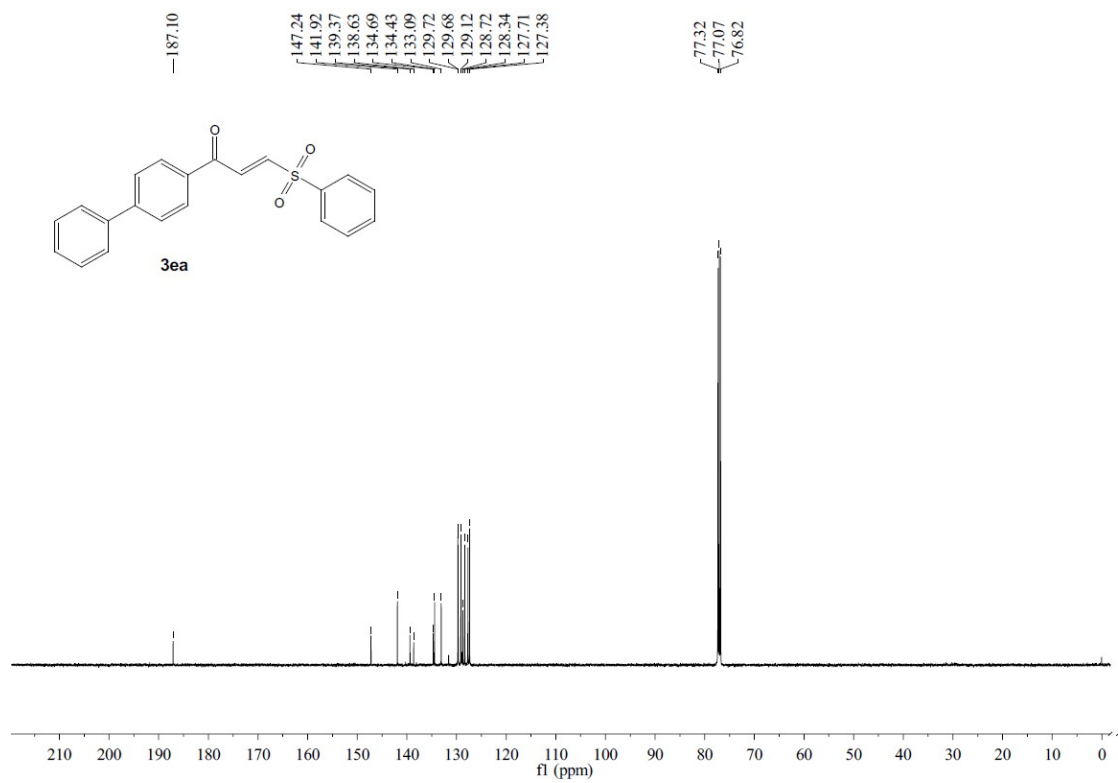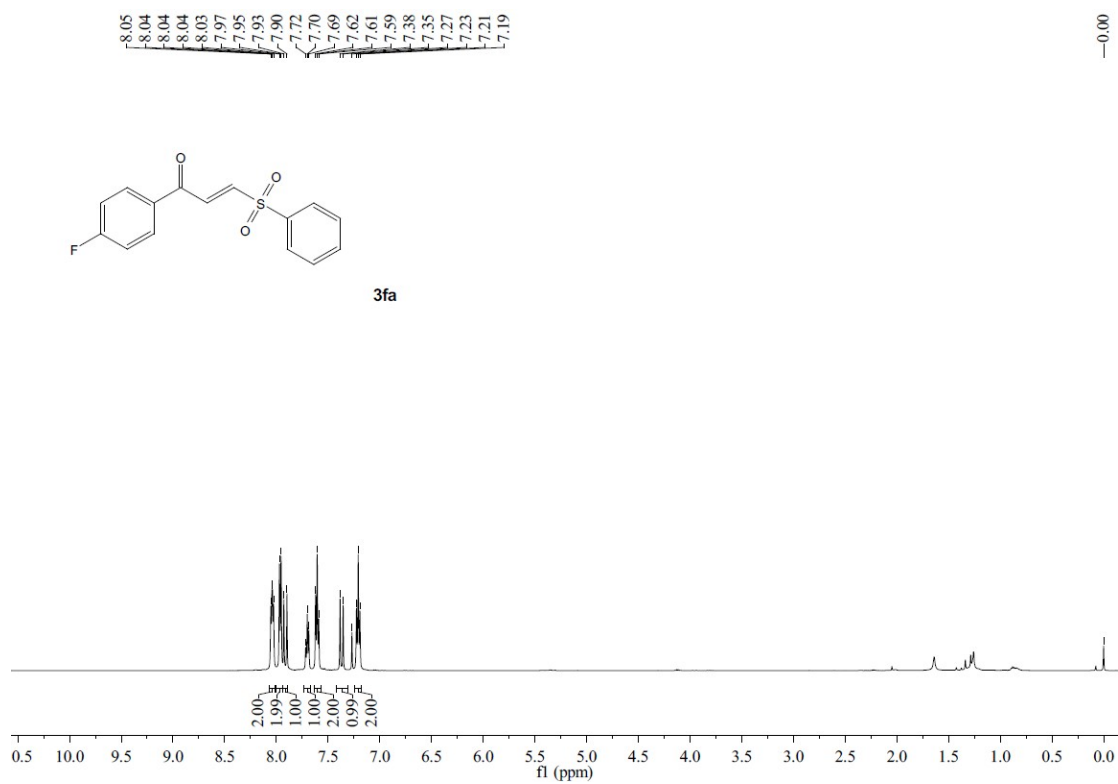

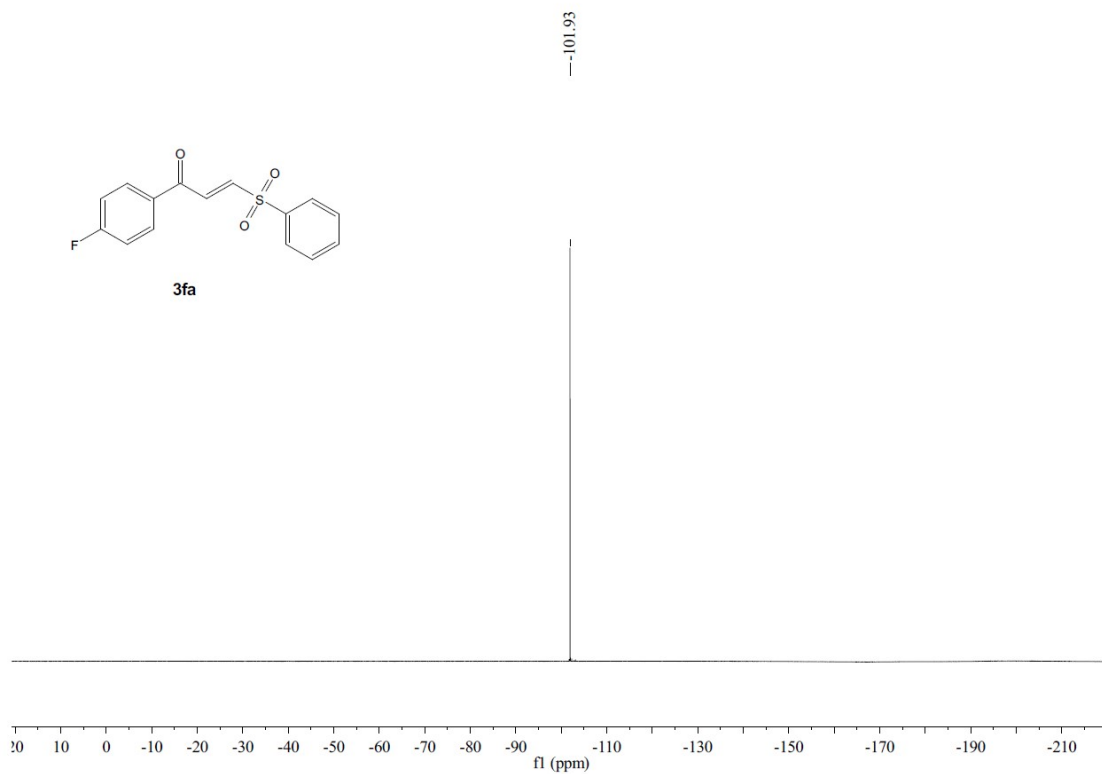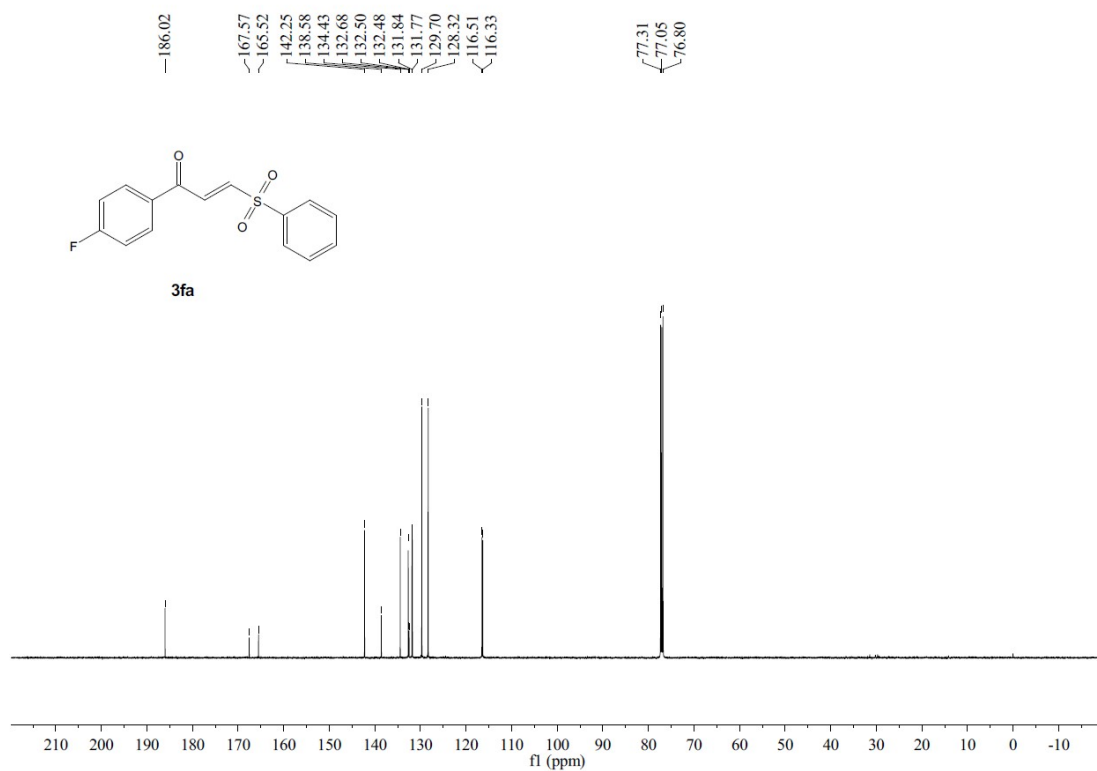

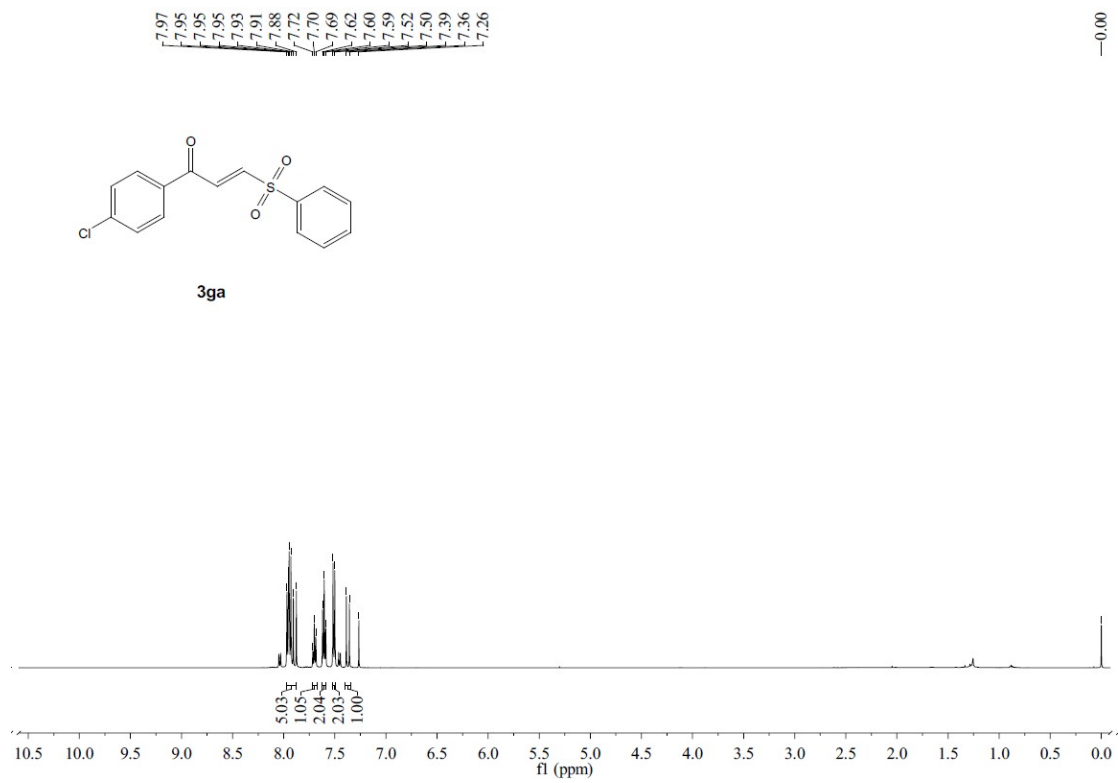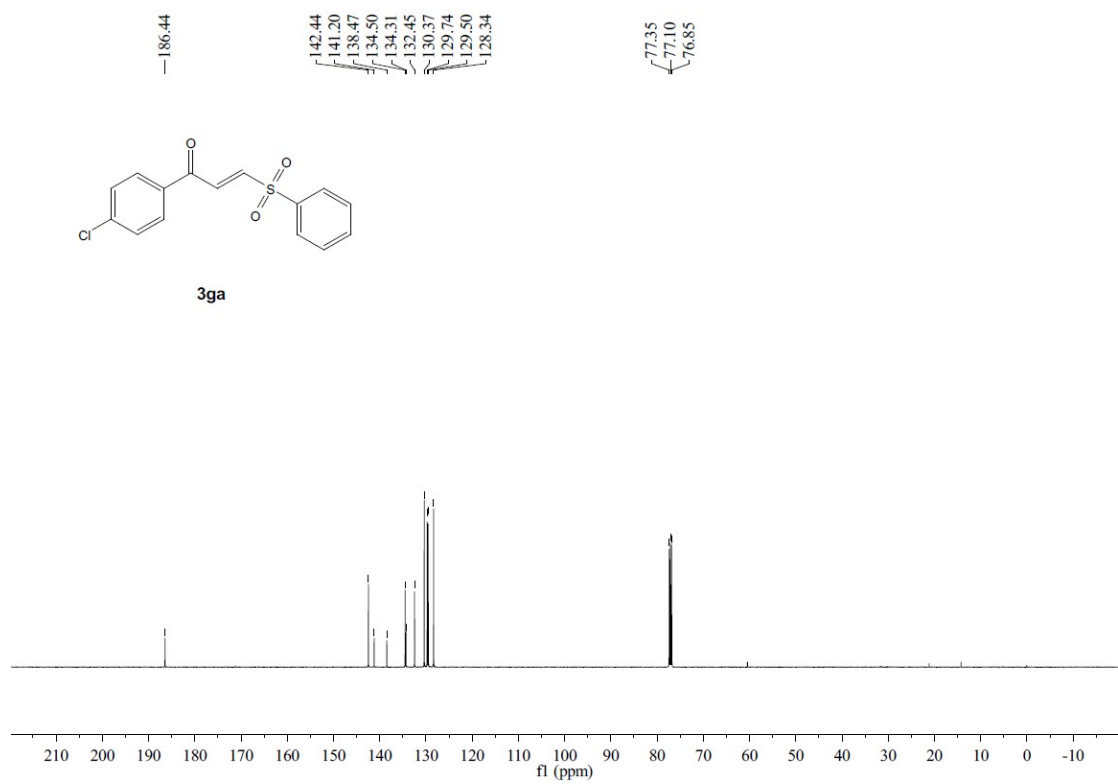

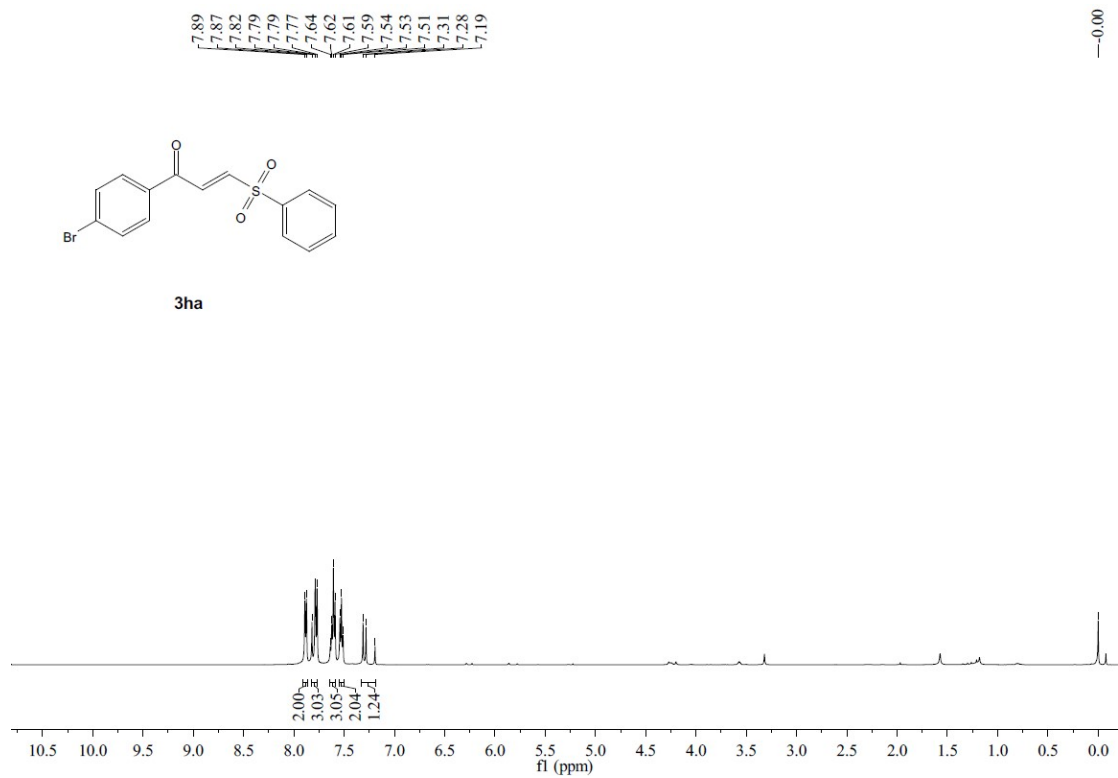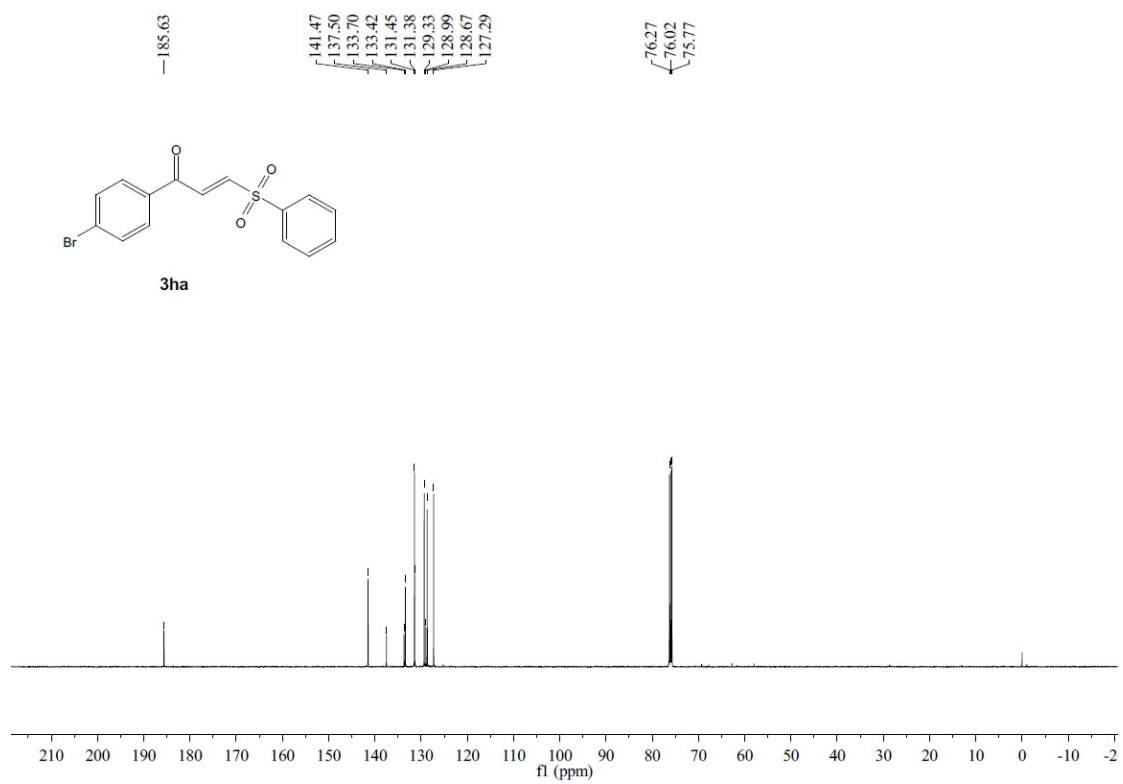

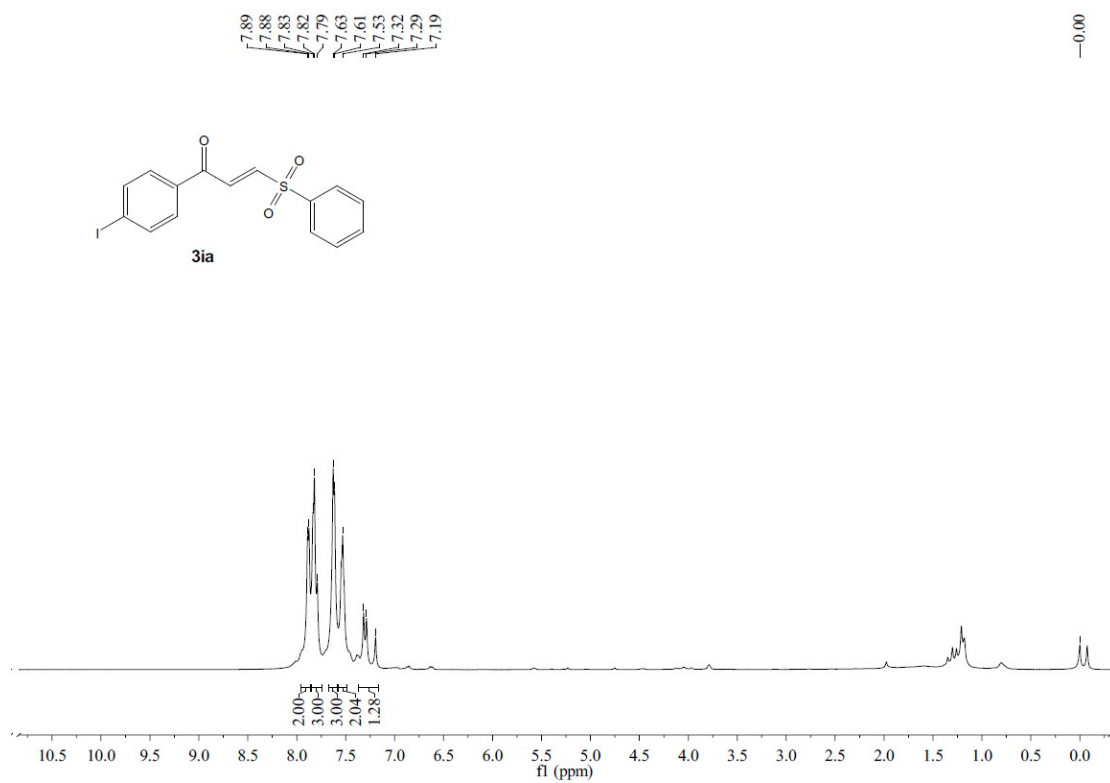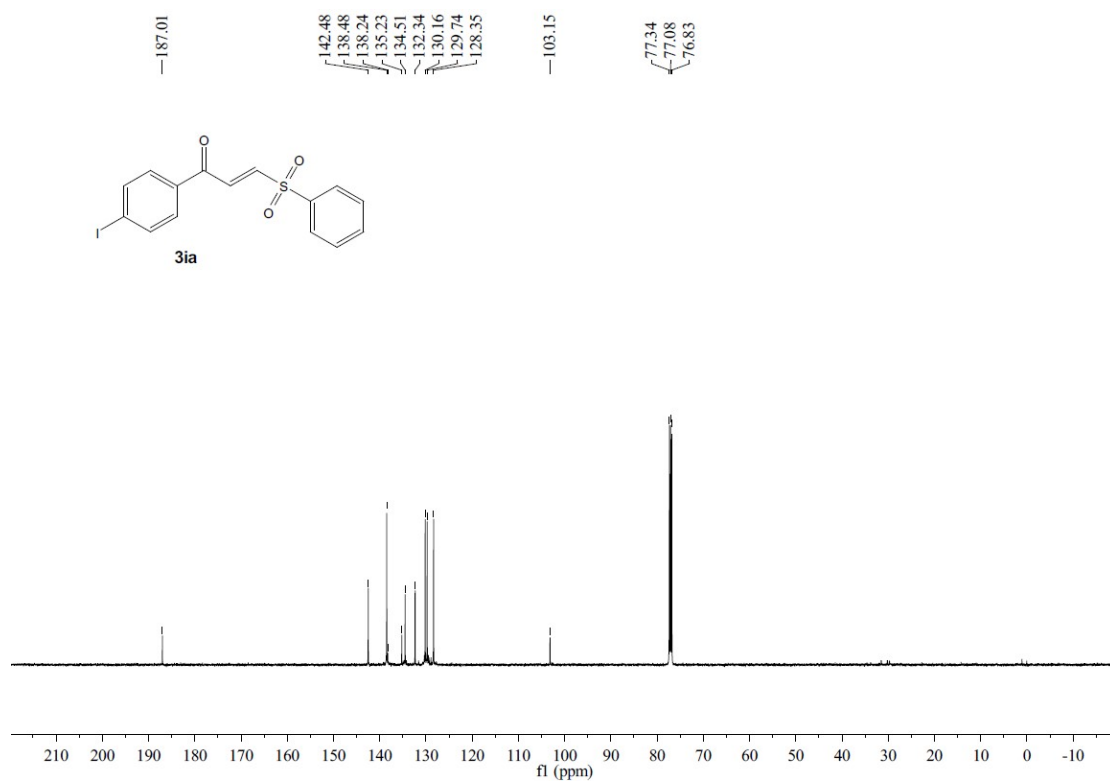



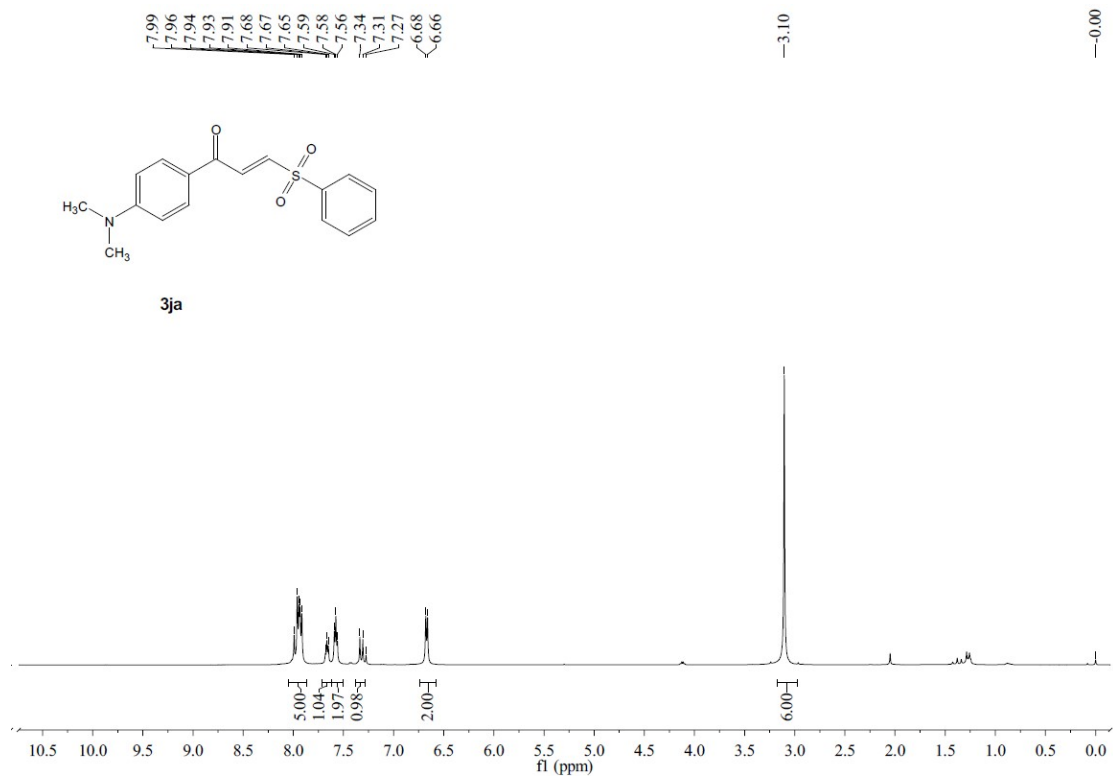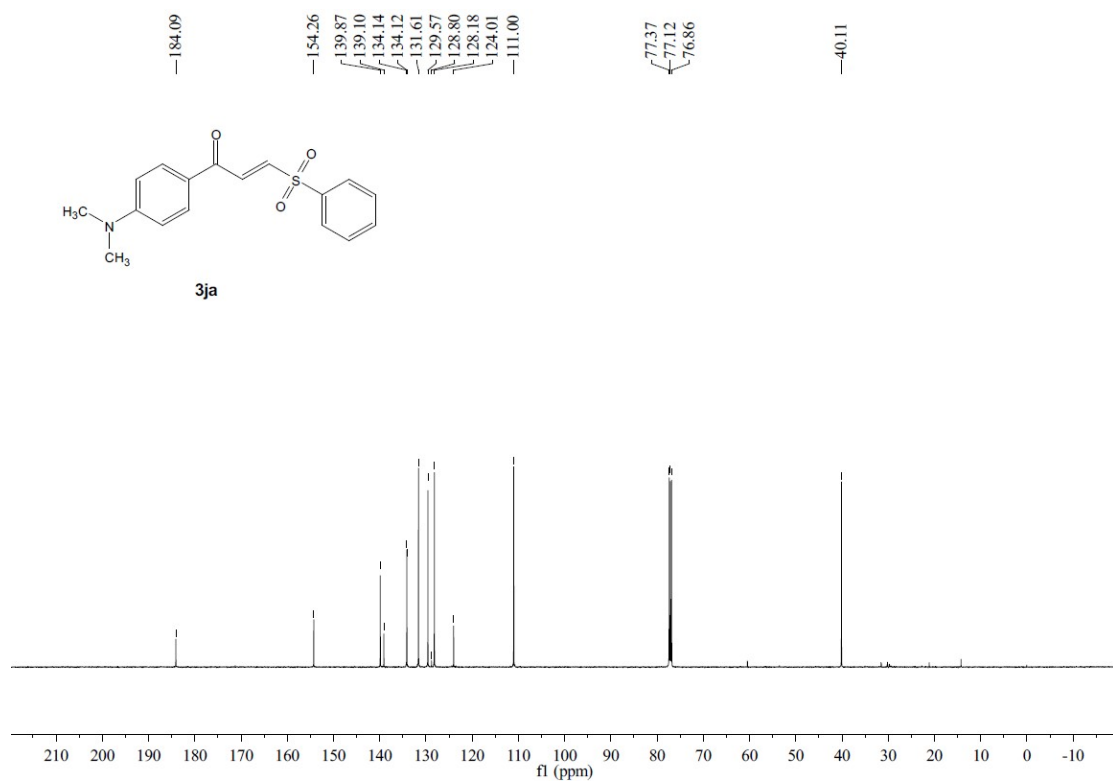

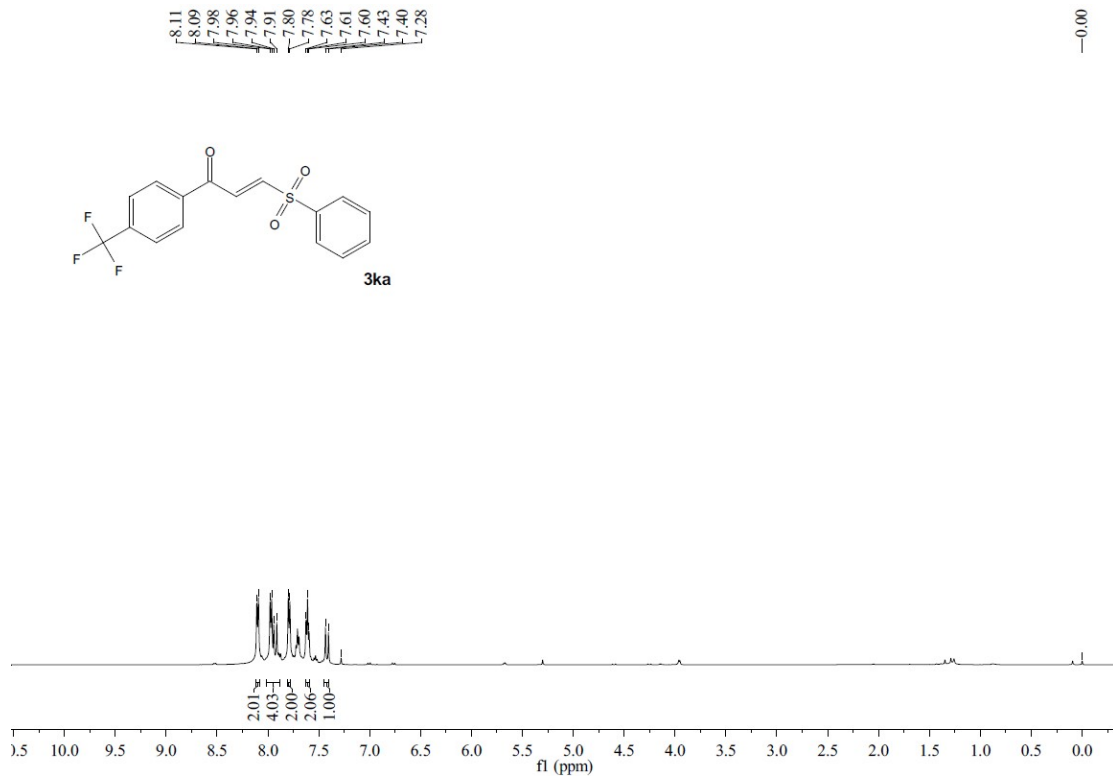

—0.00

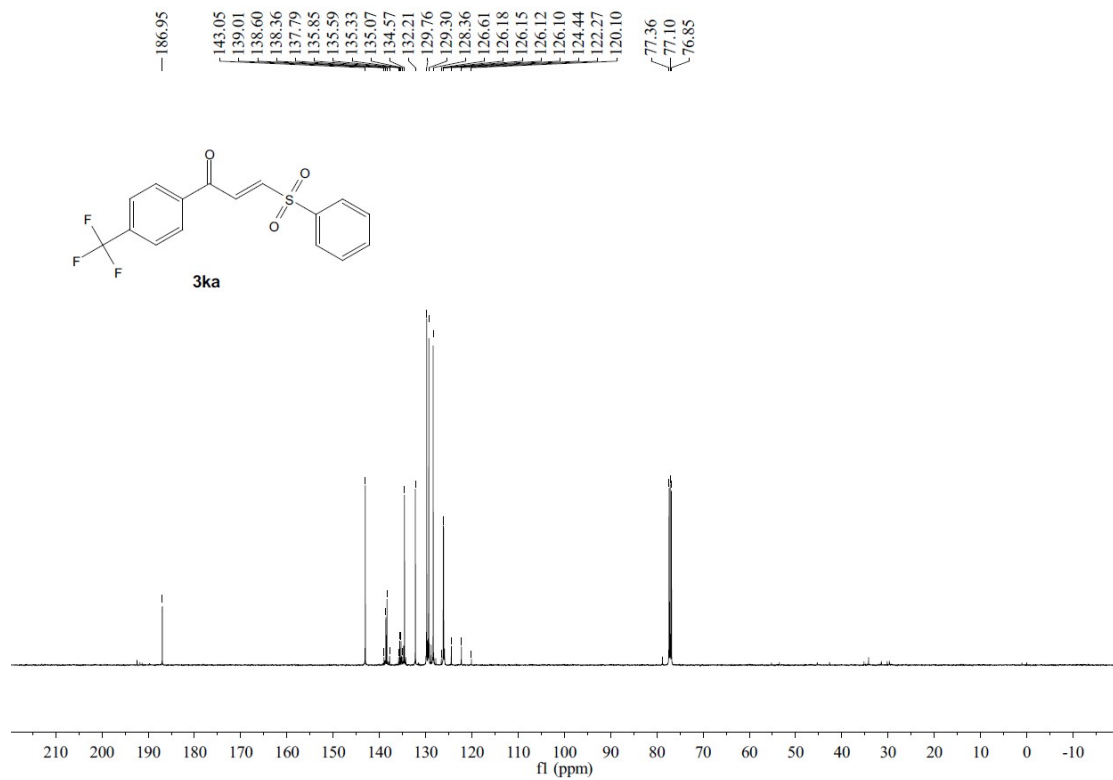

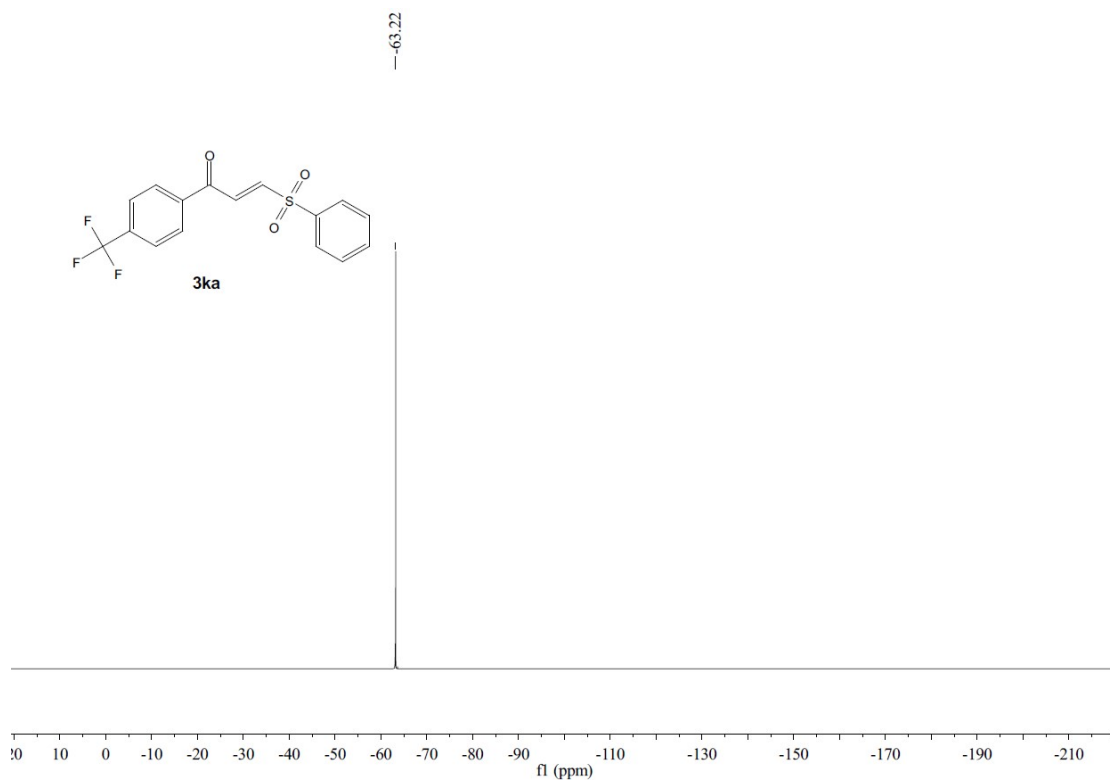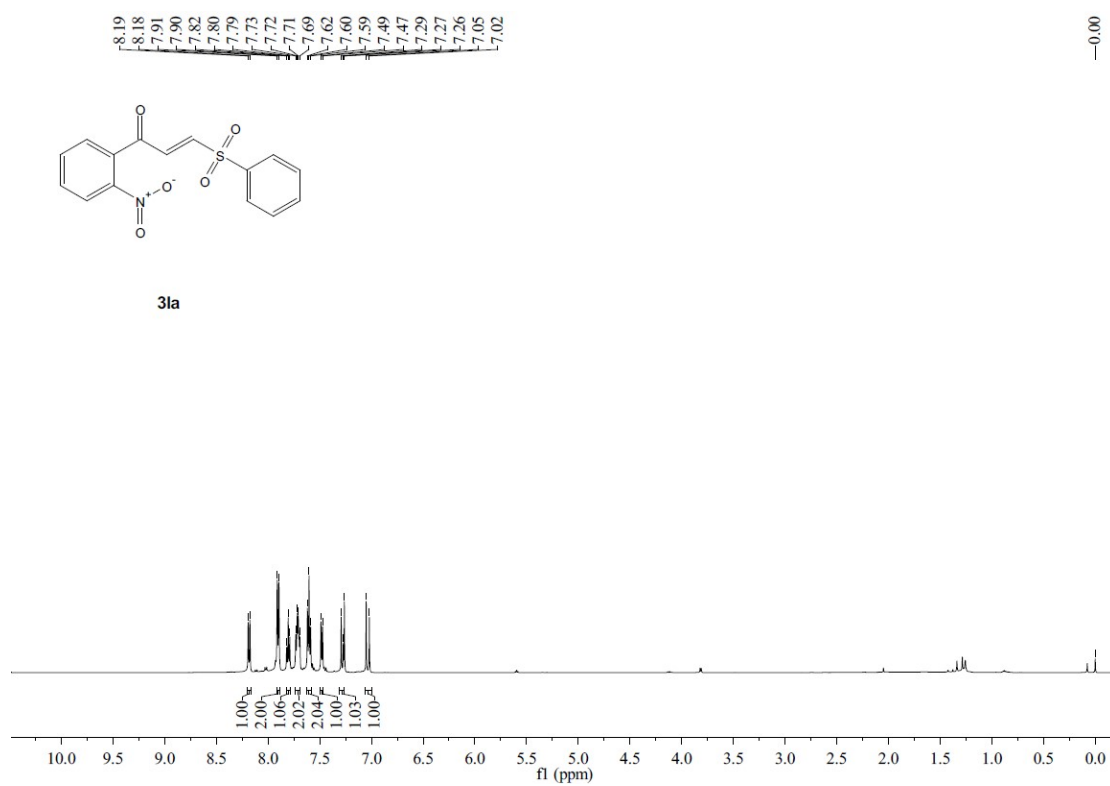

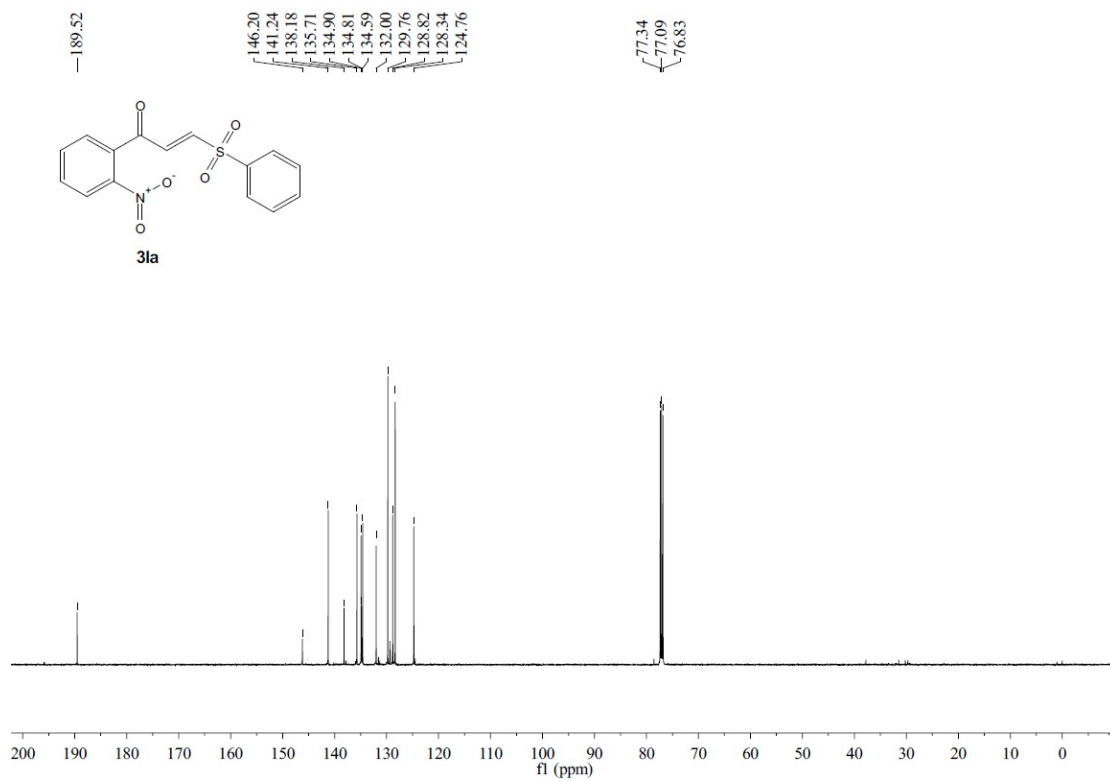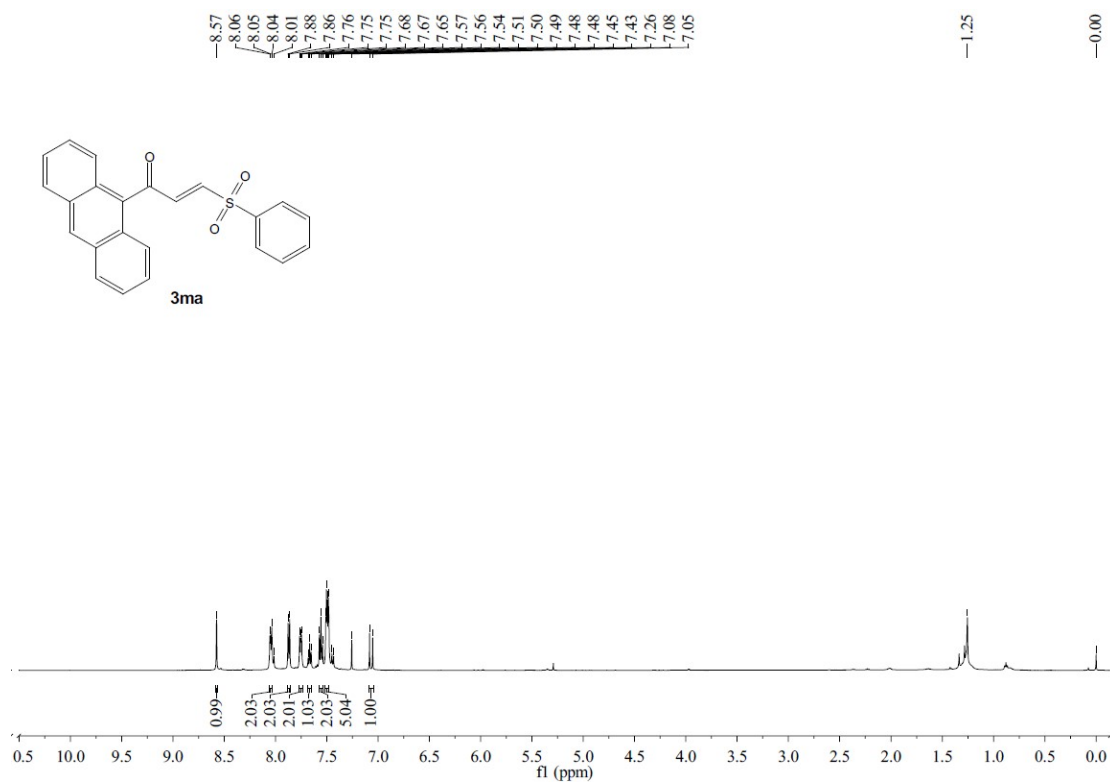

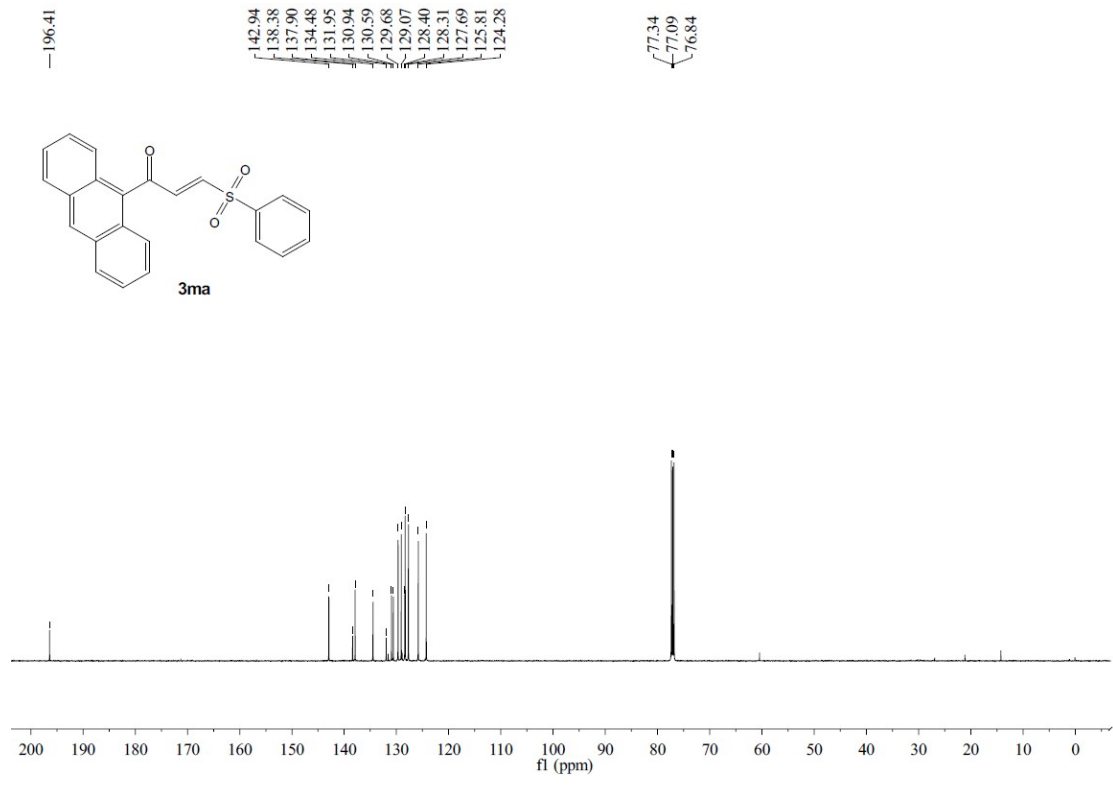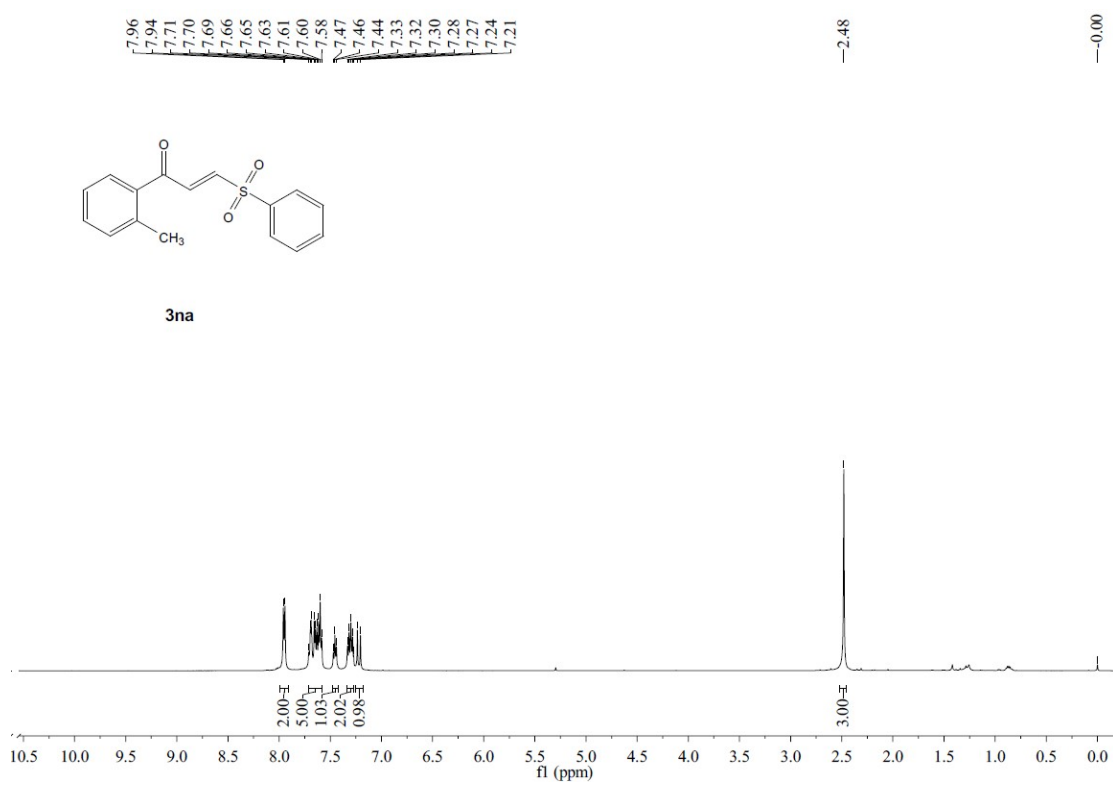

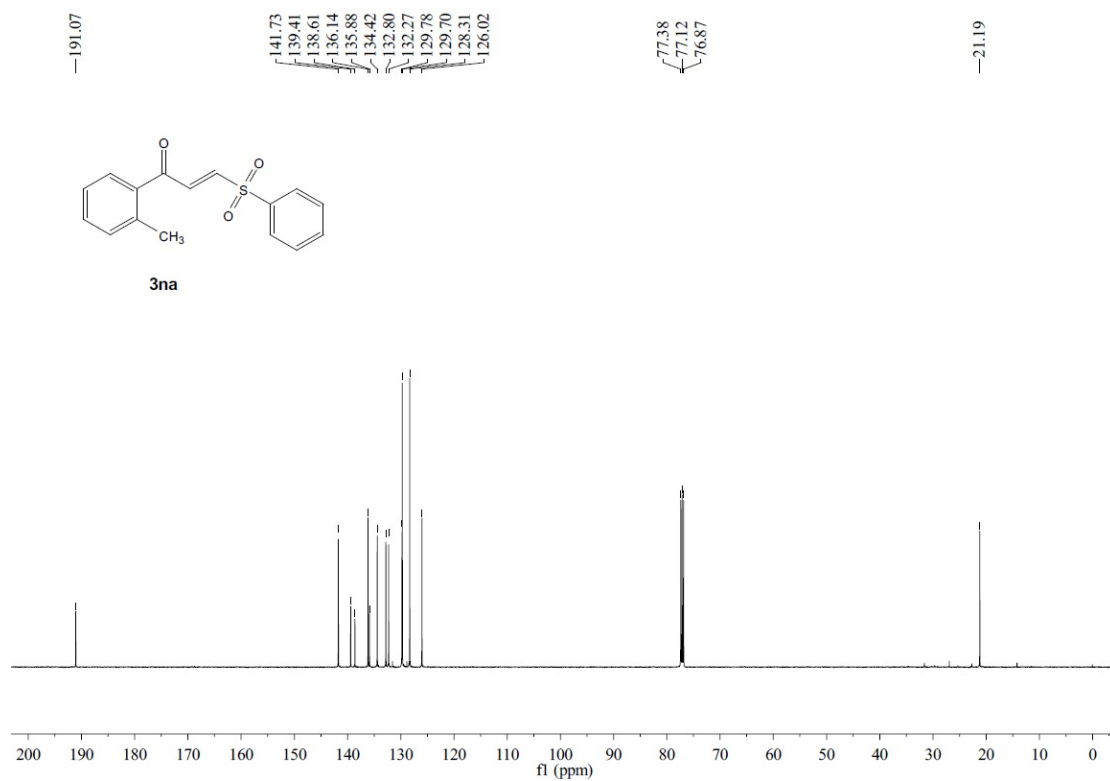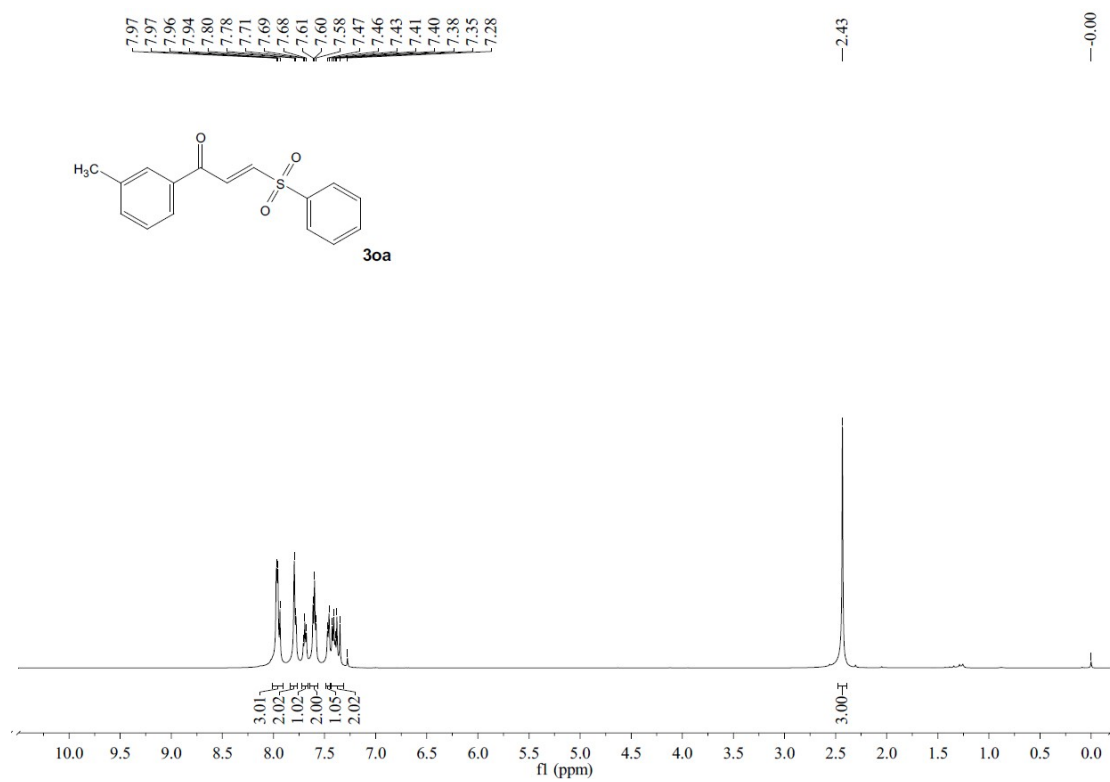

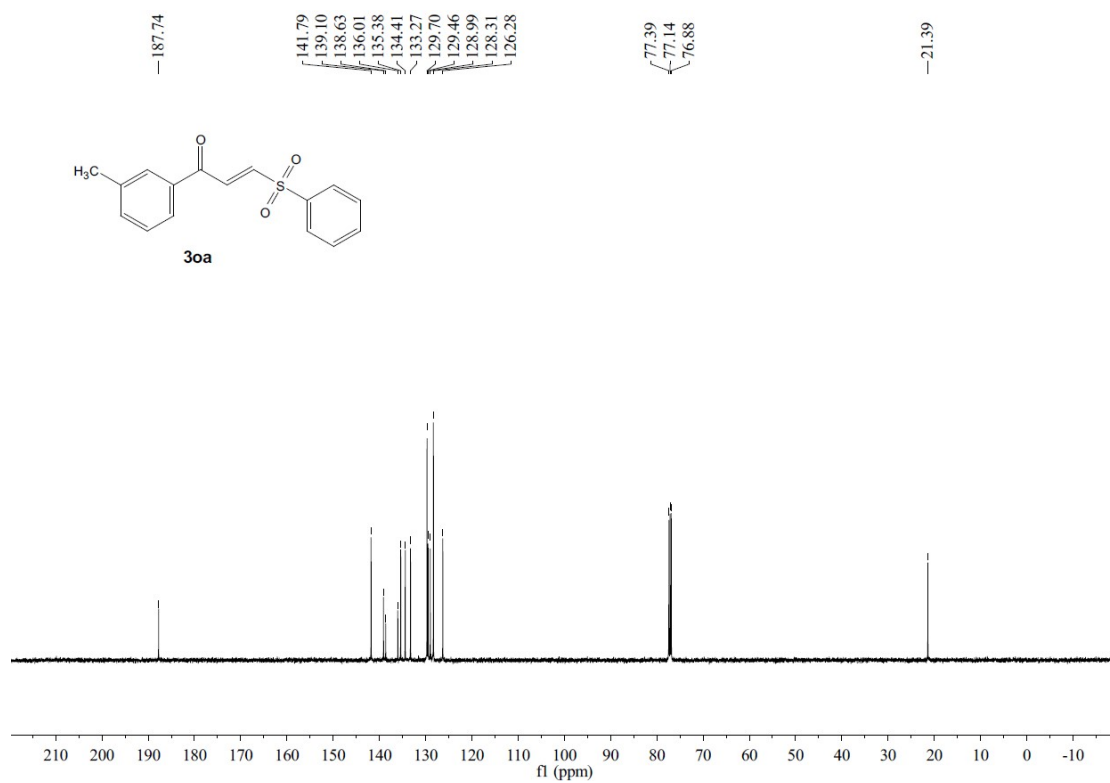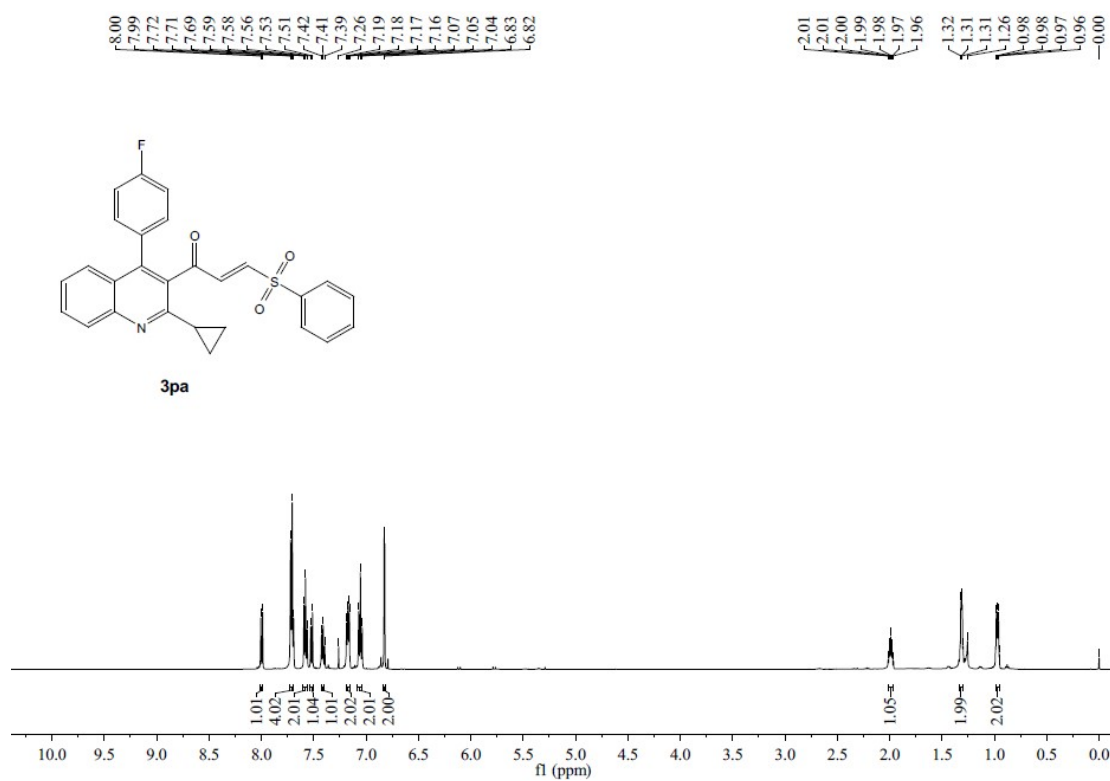

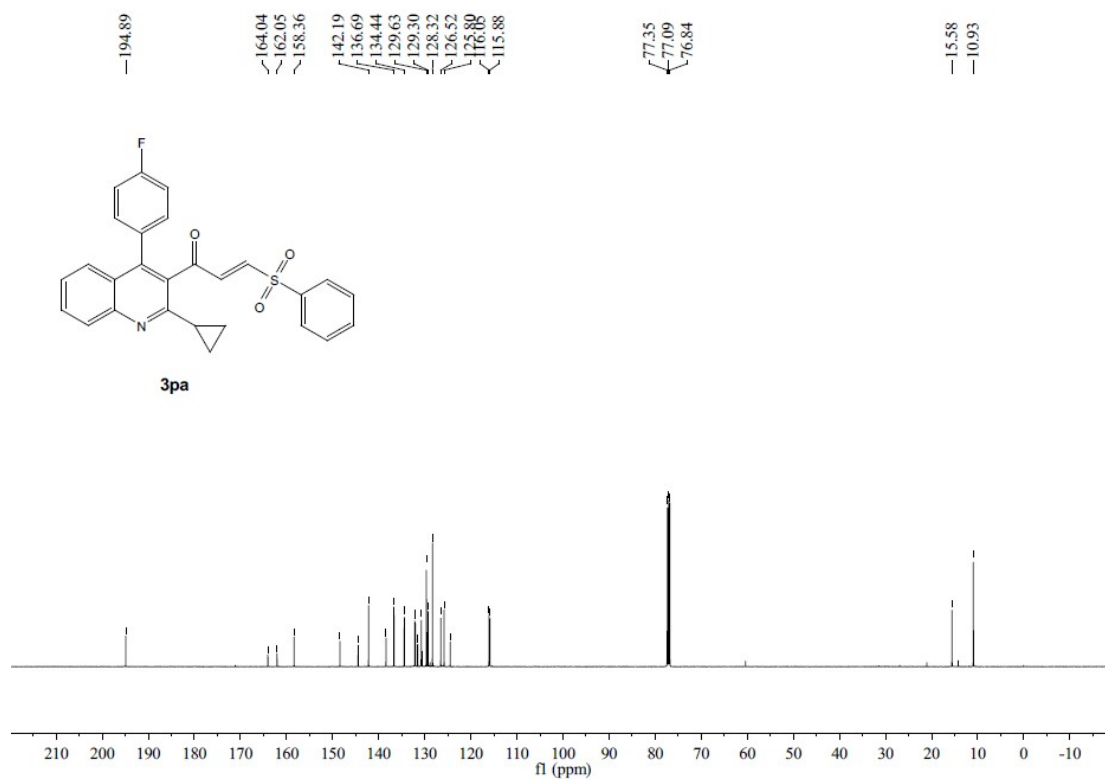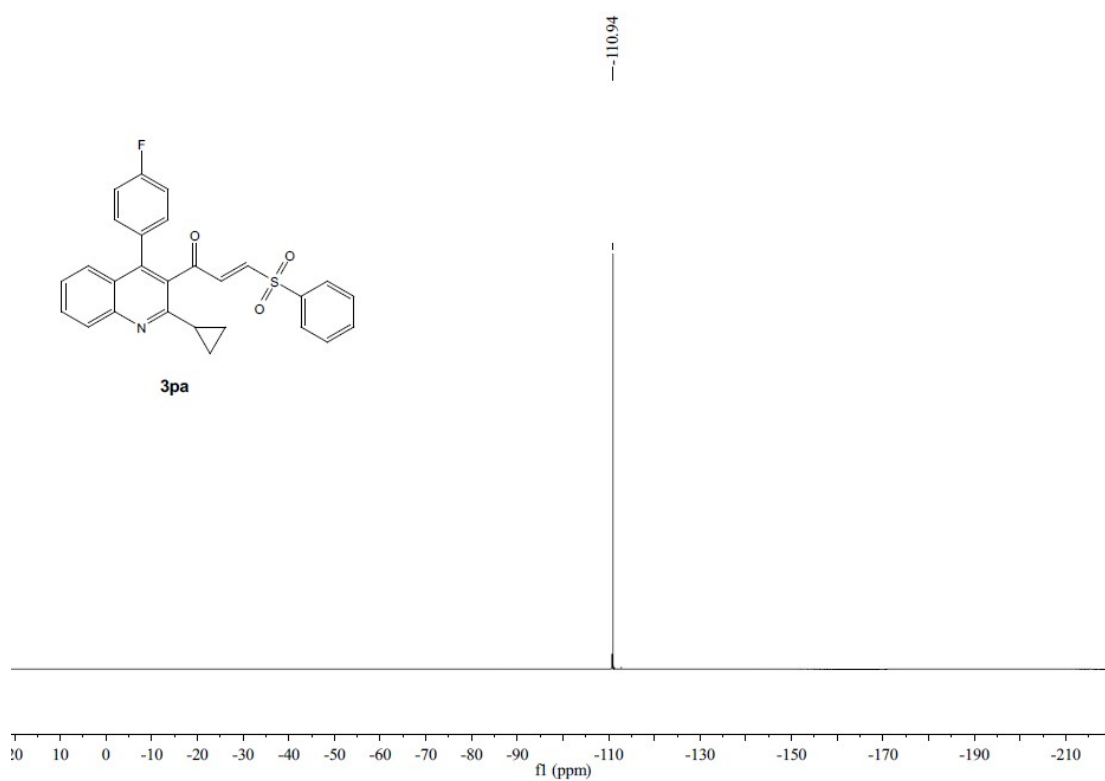



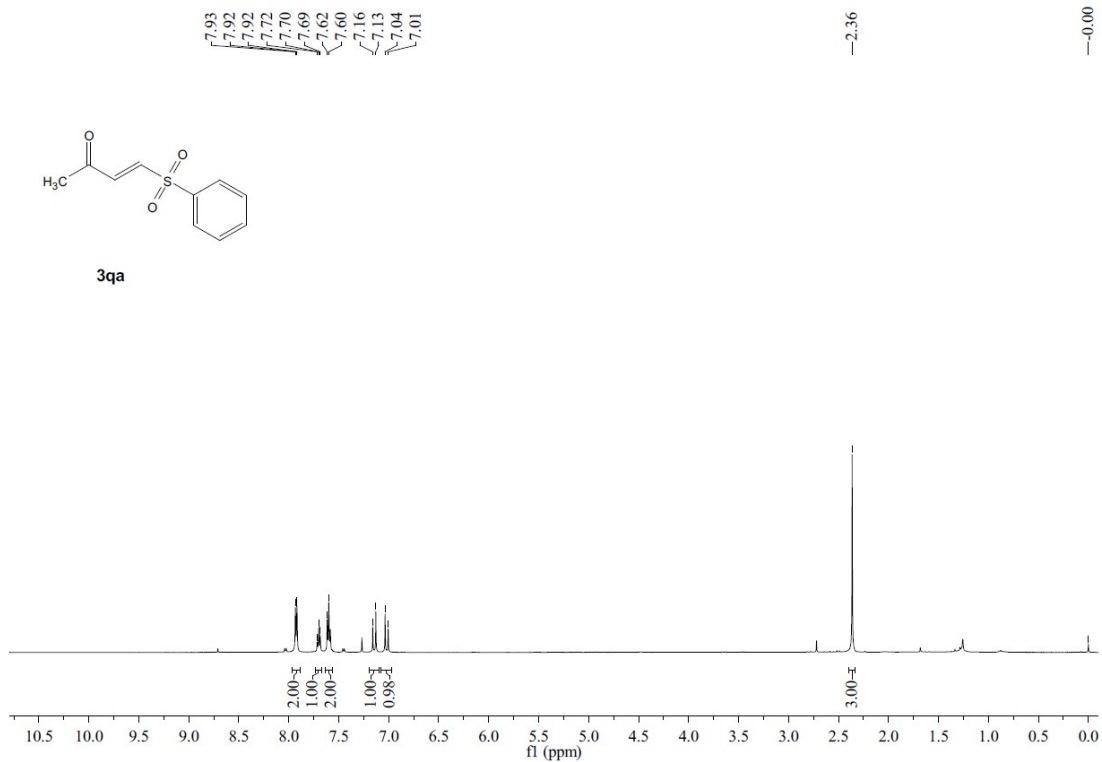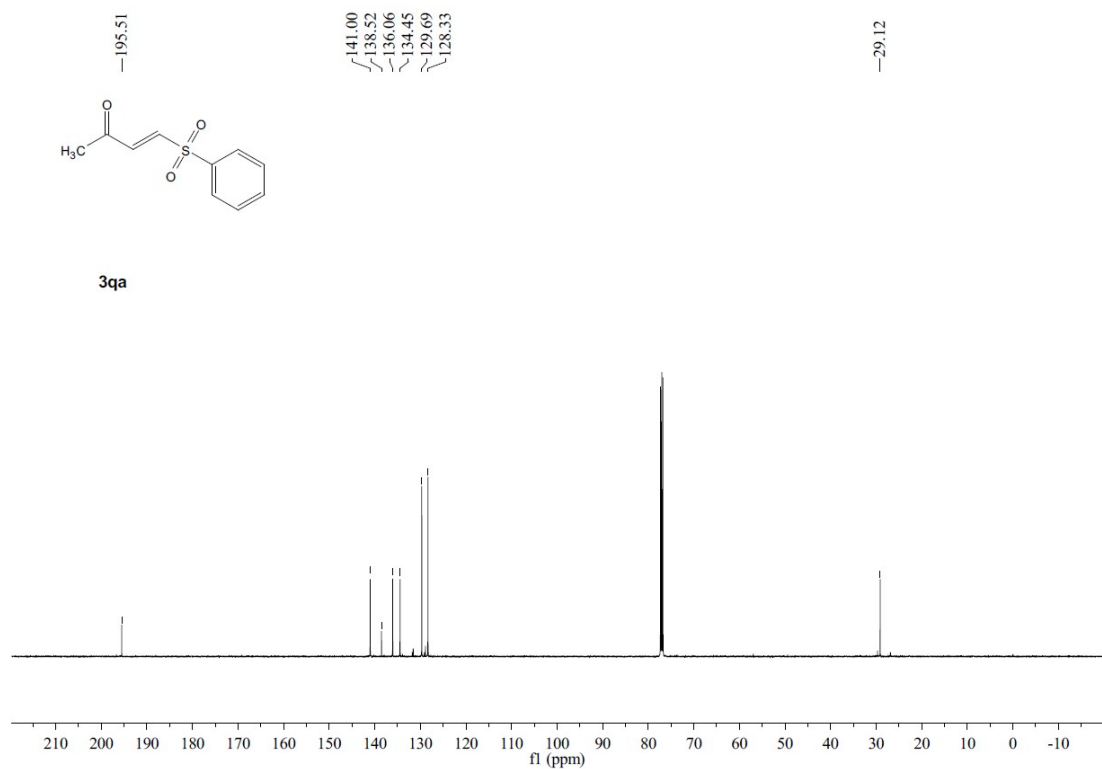

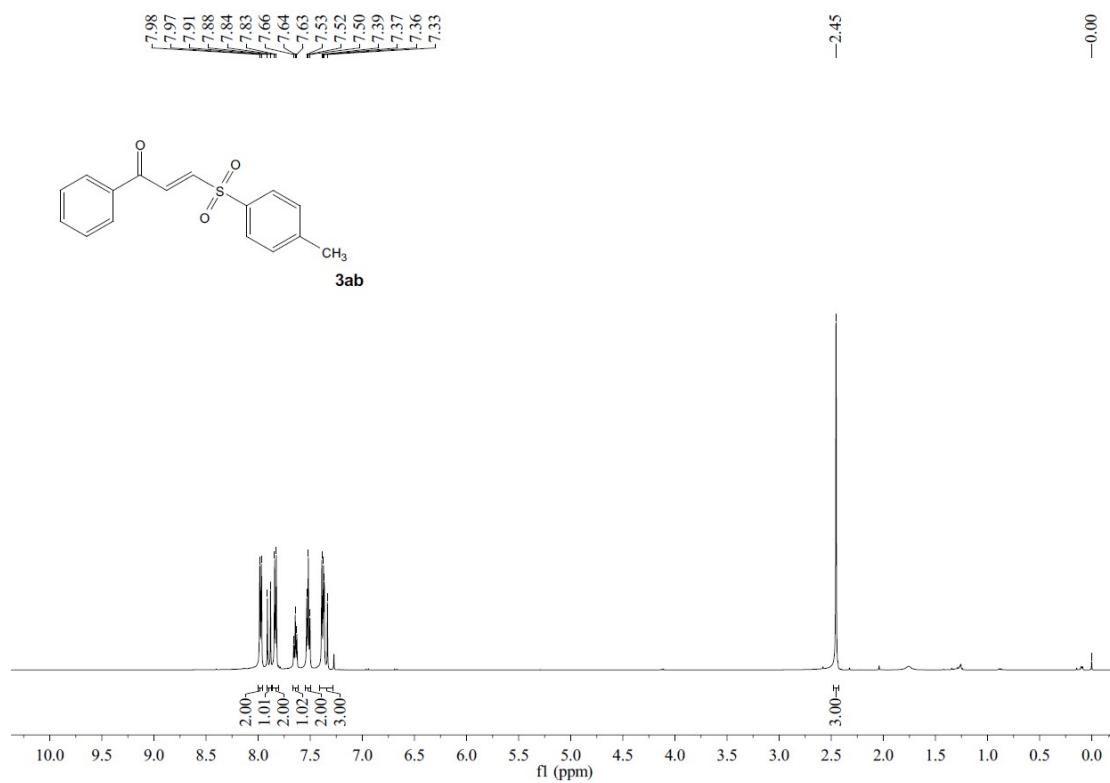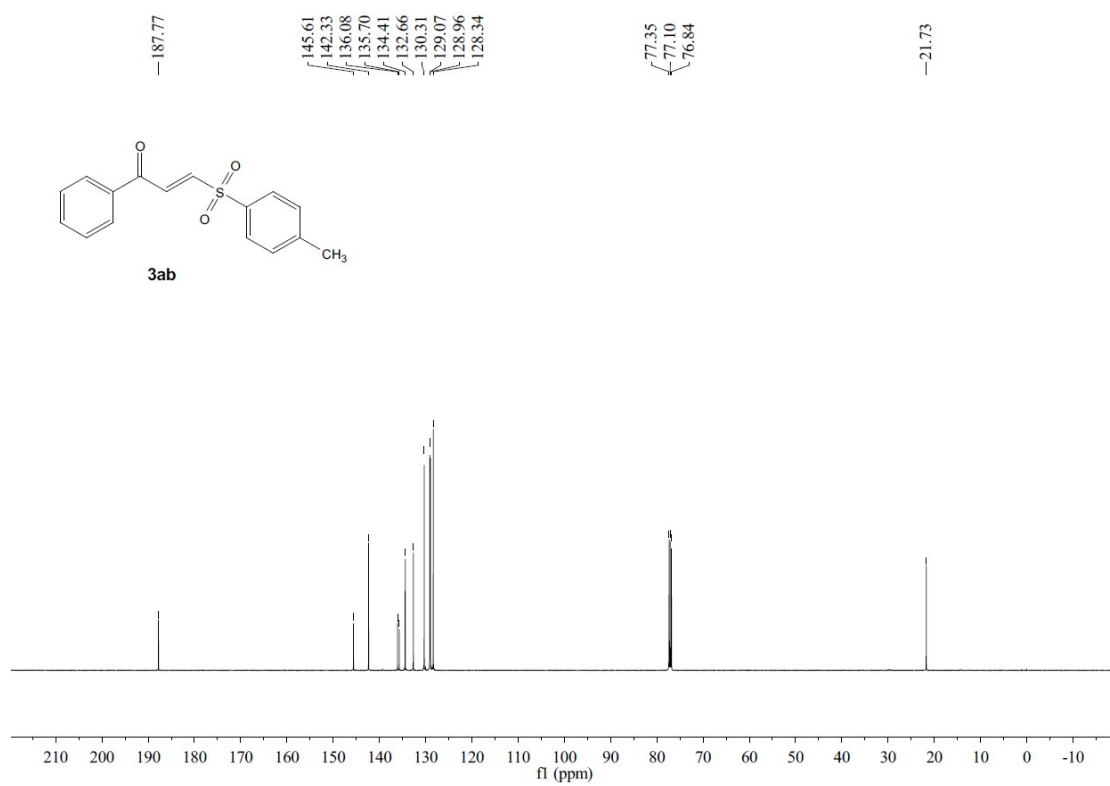

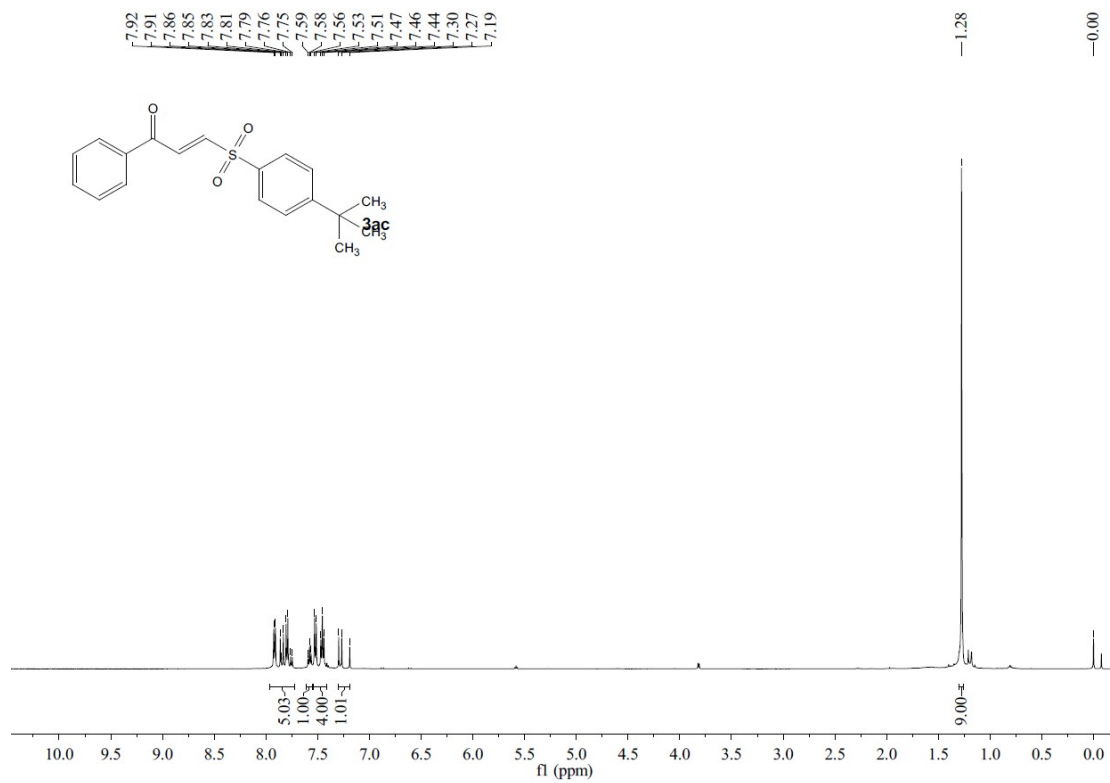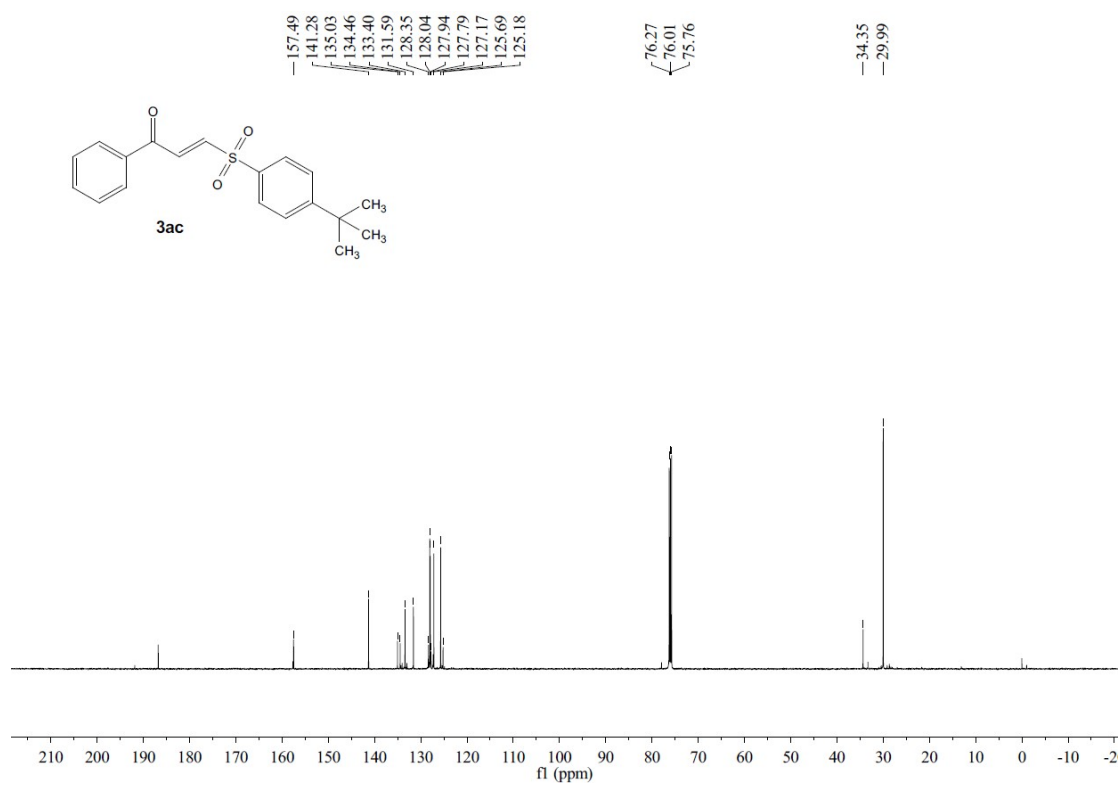

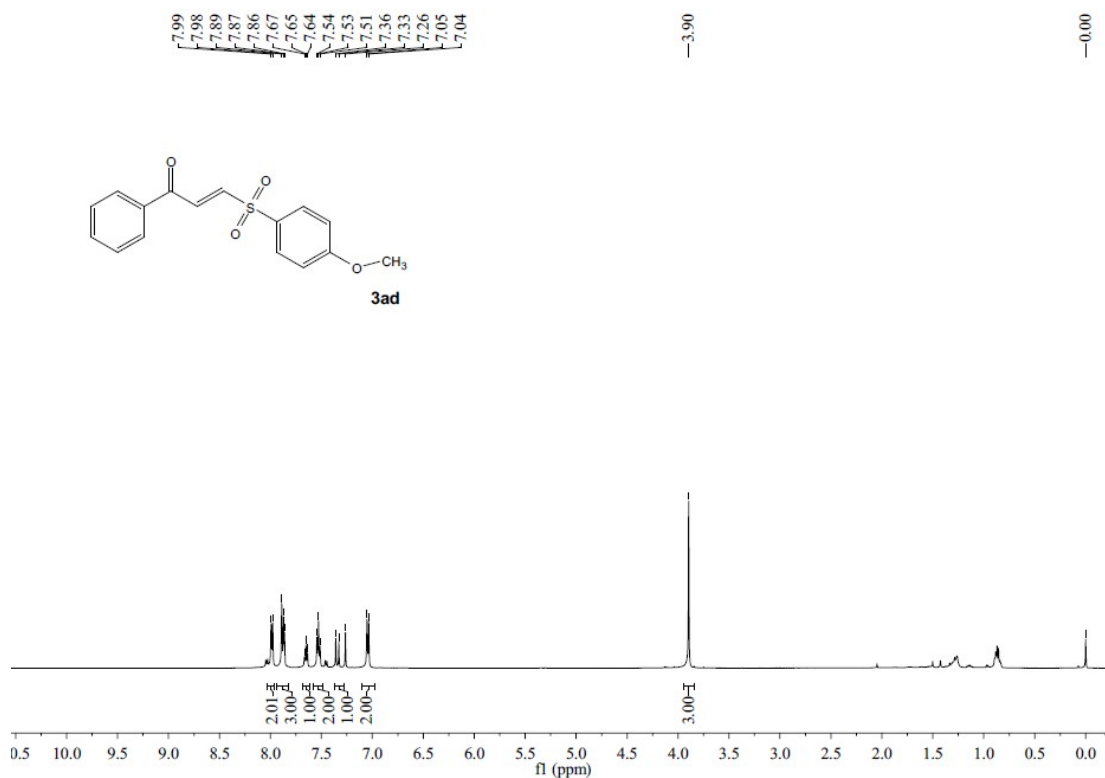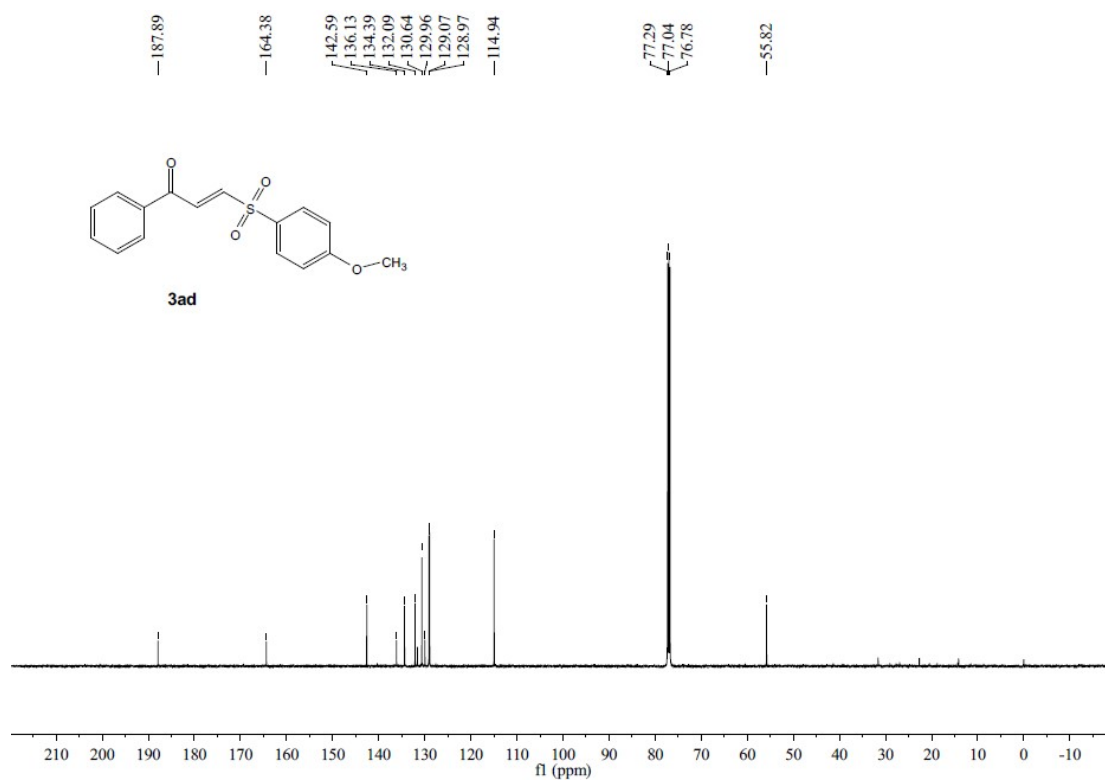

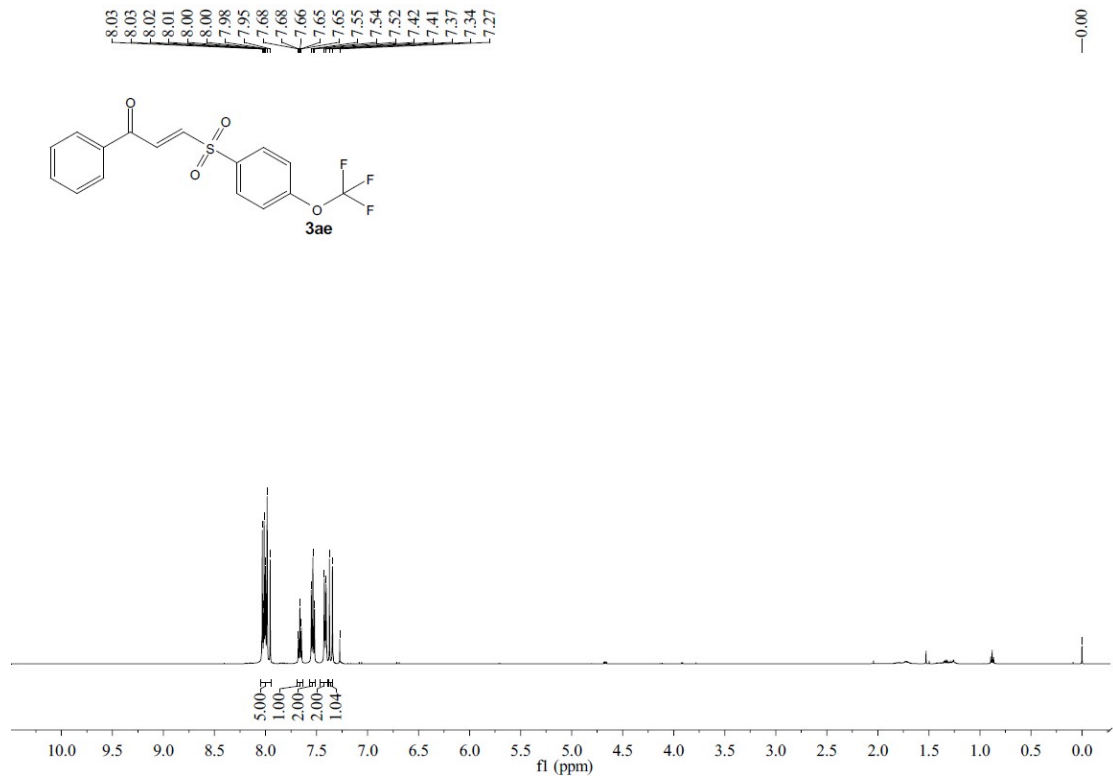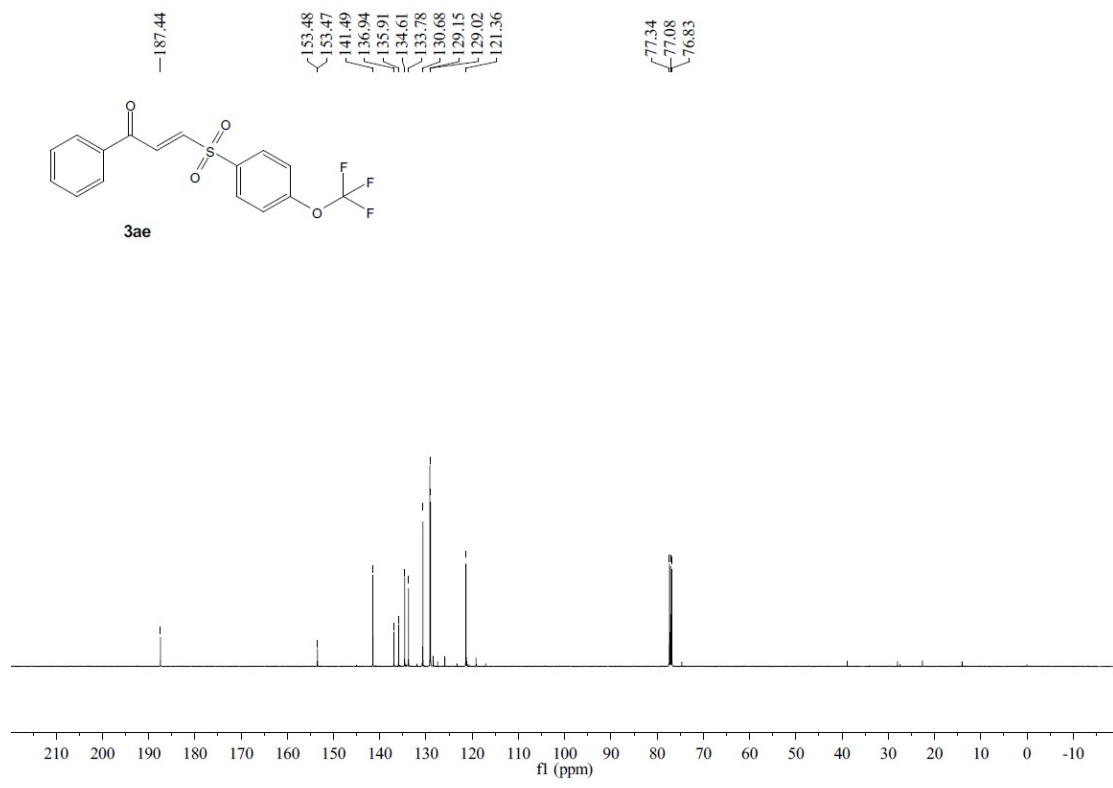

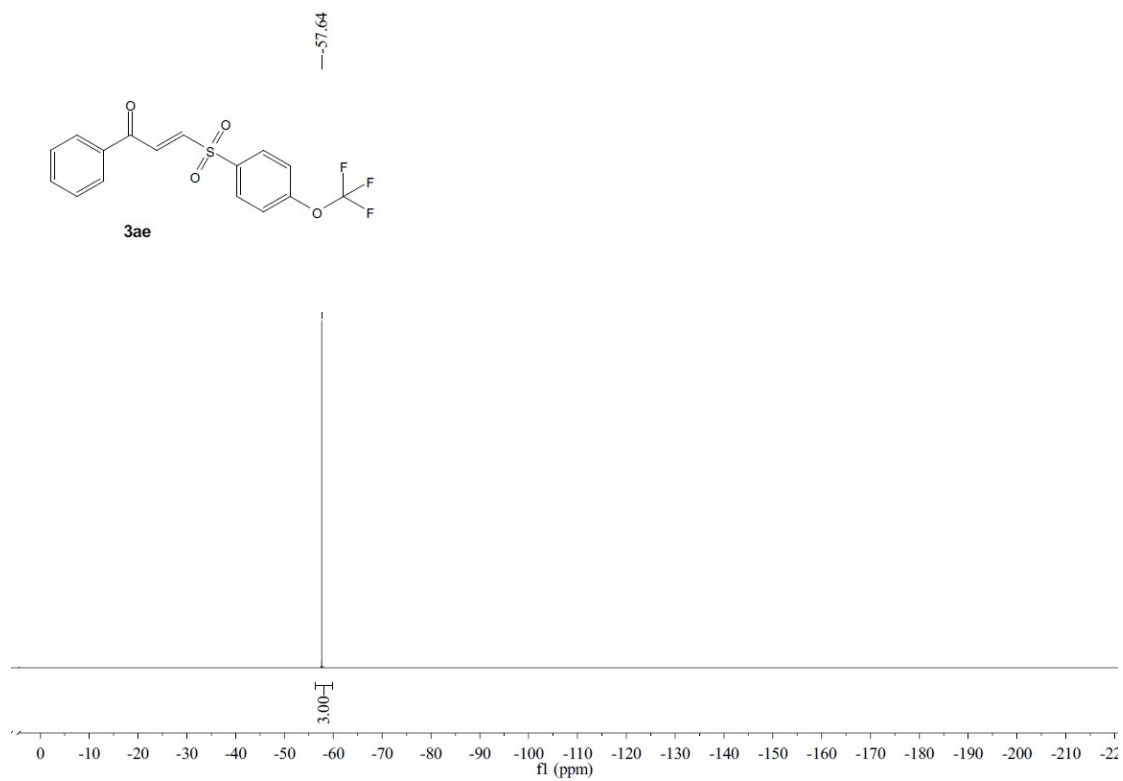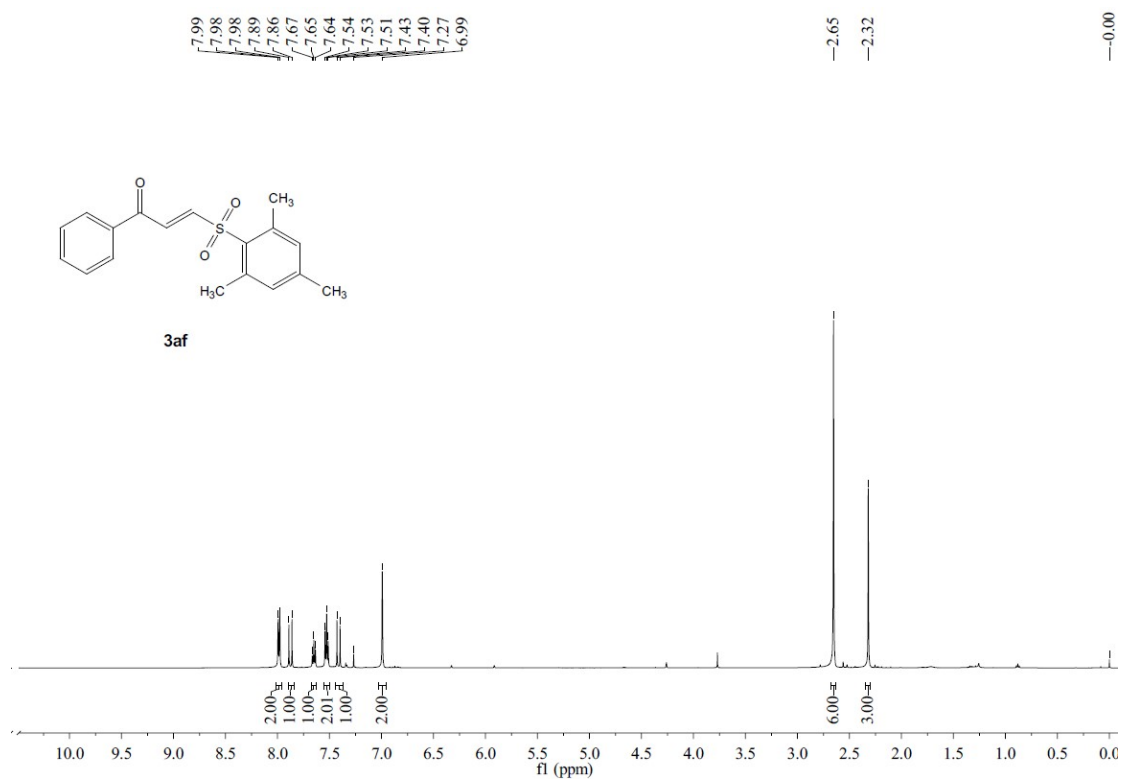

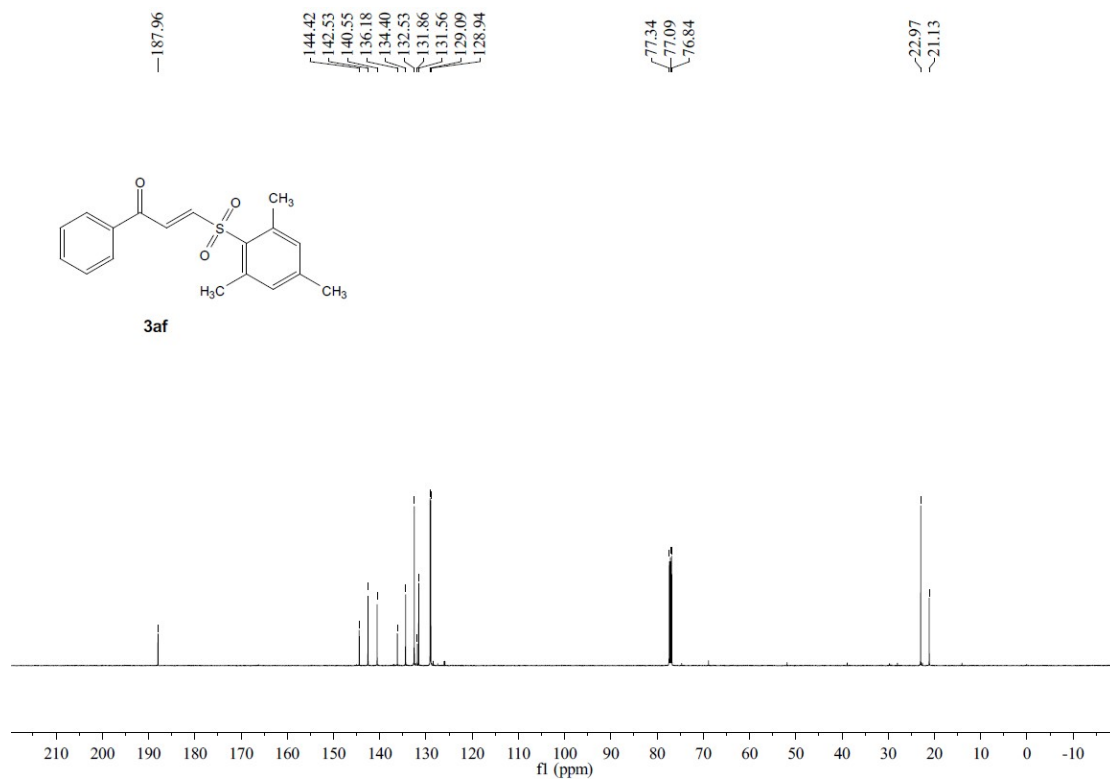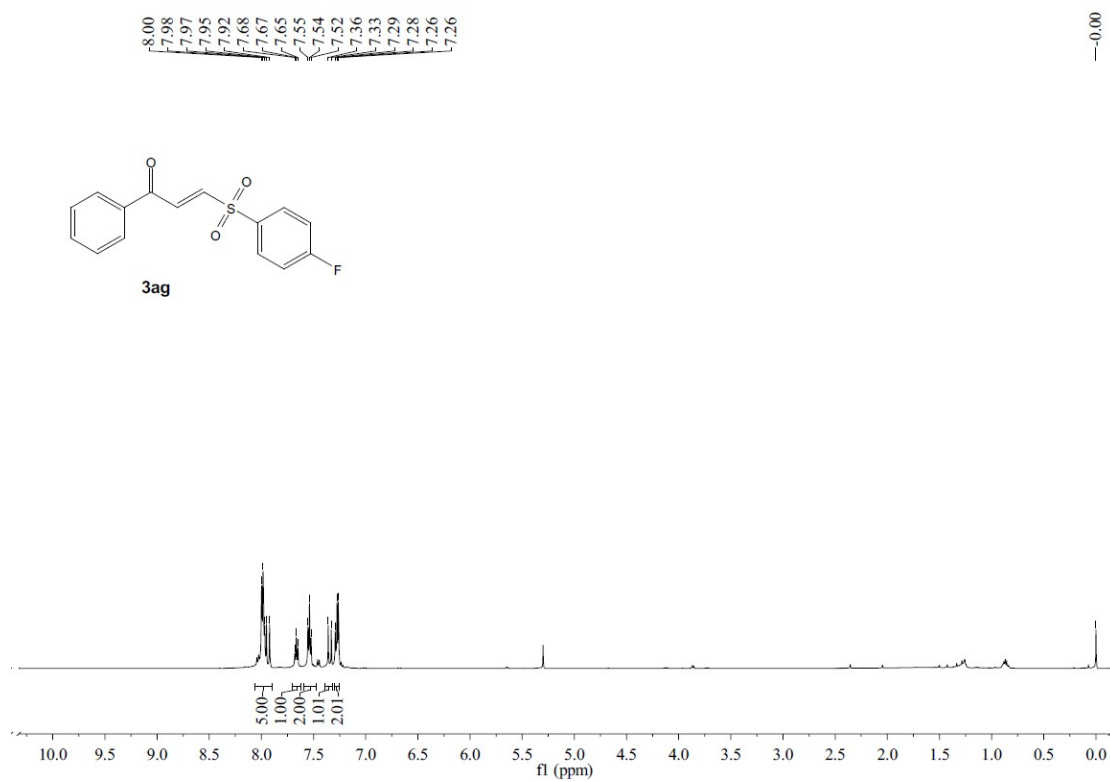

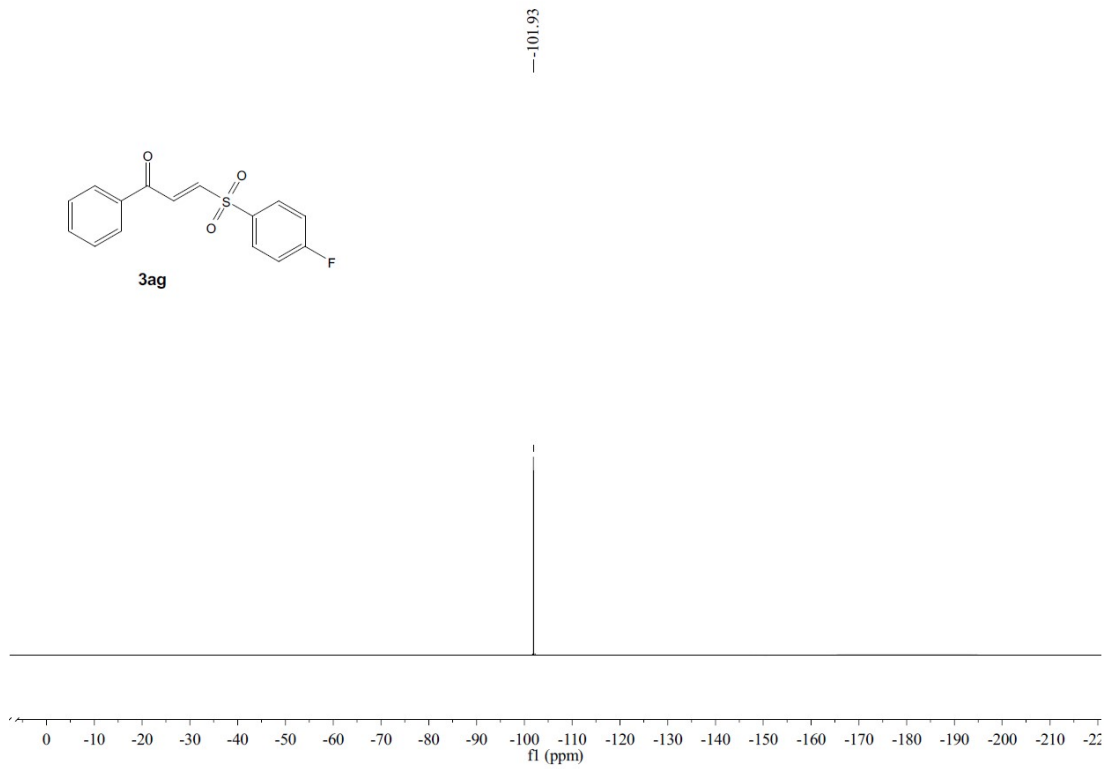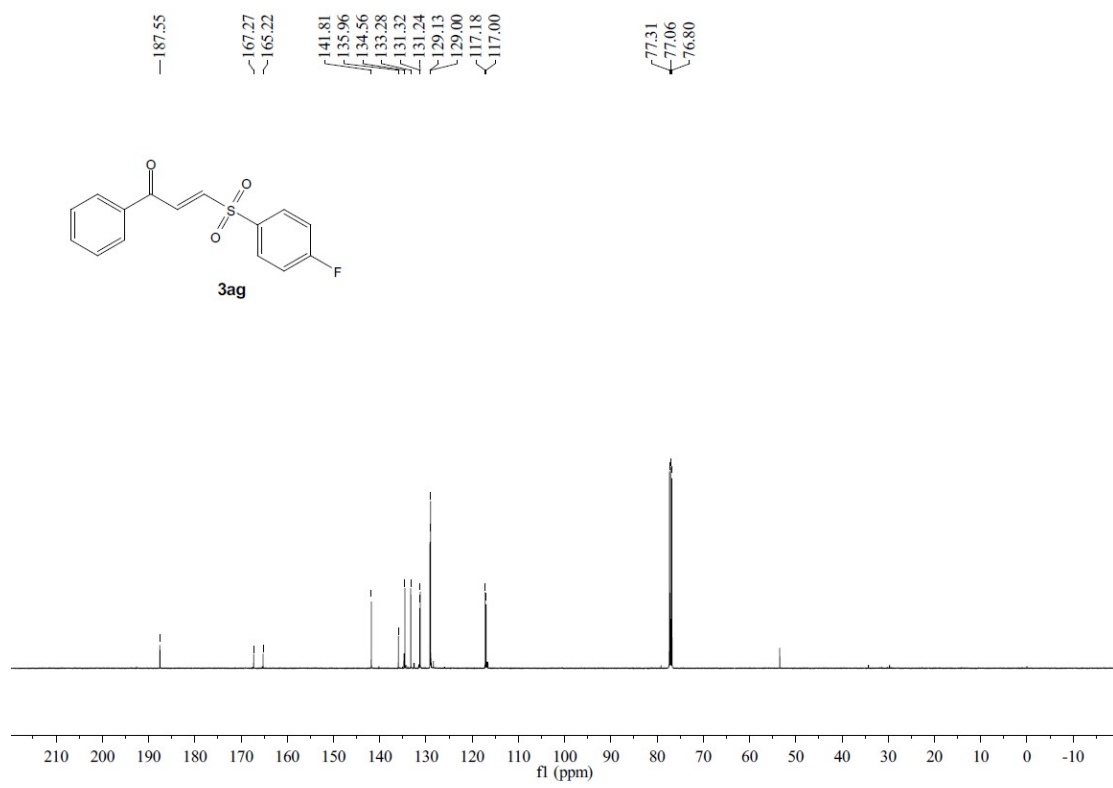



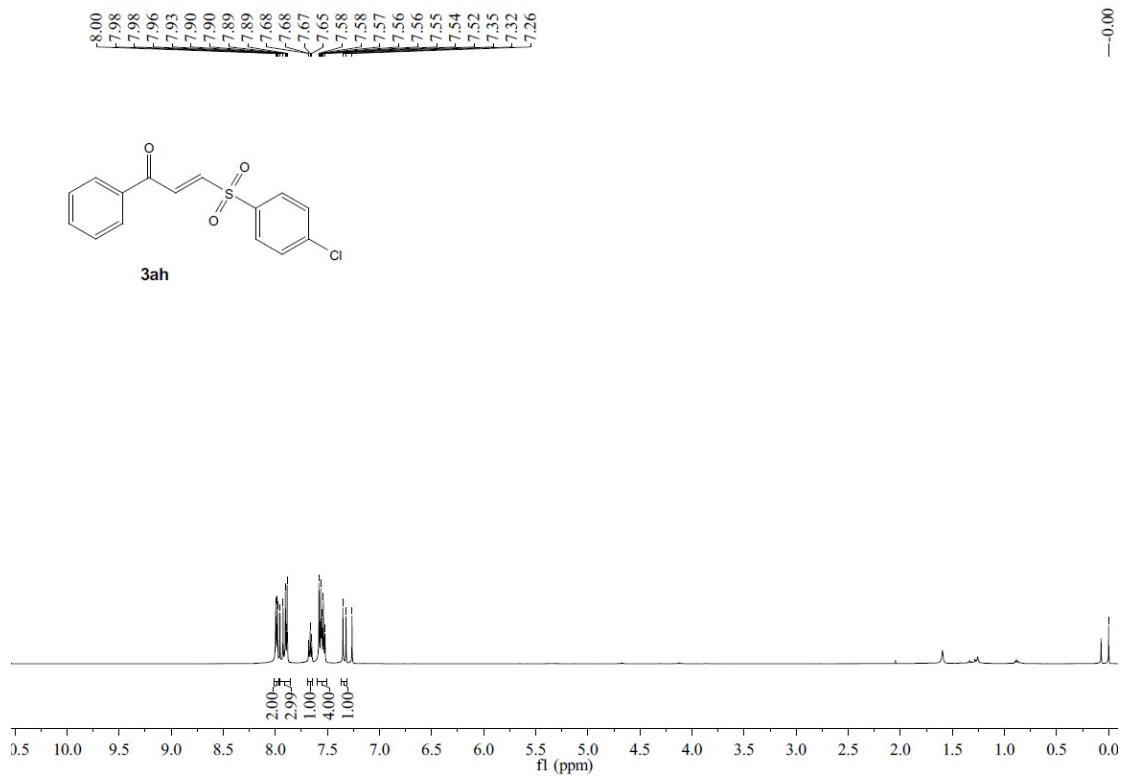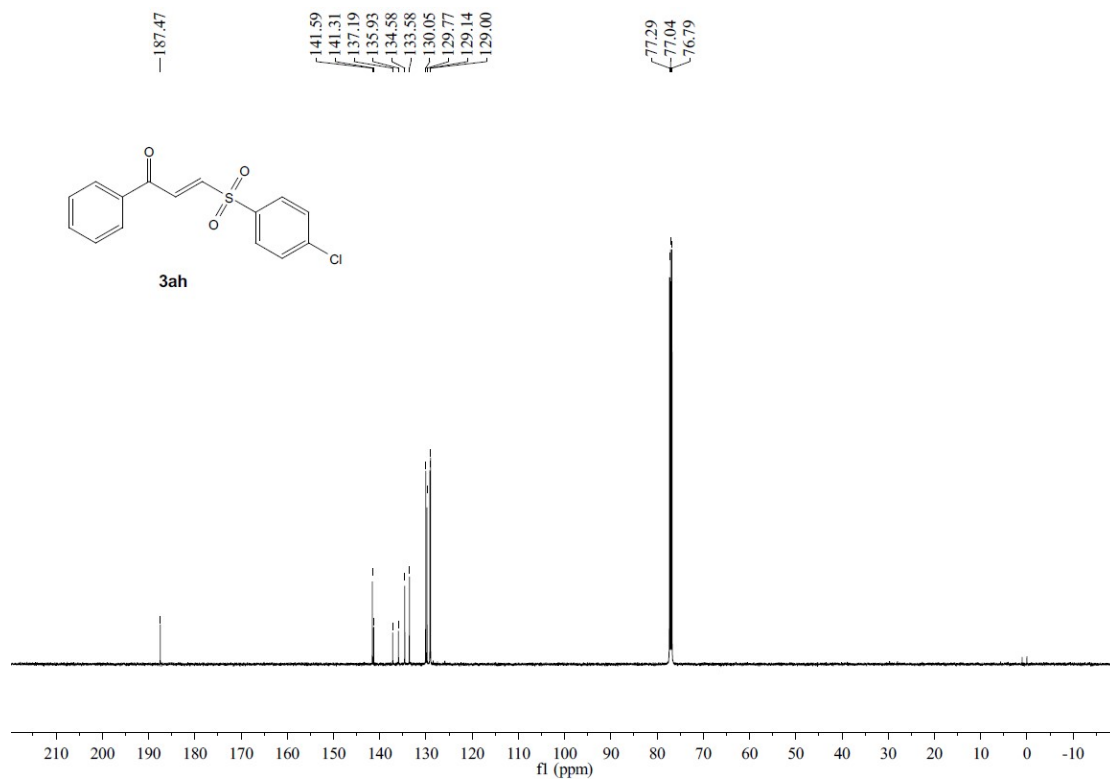

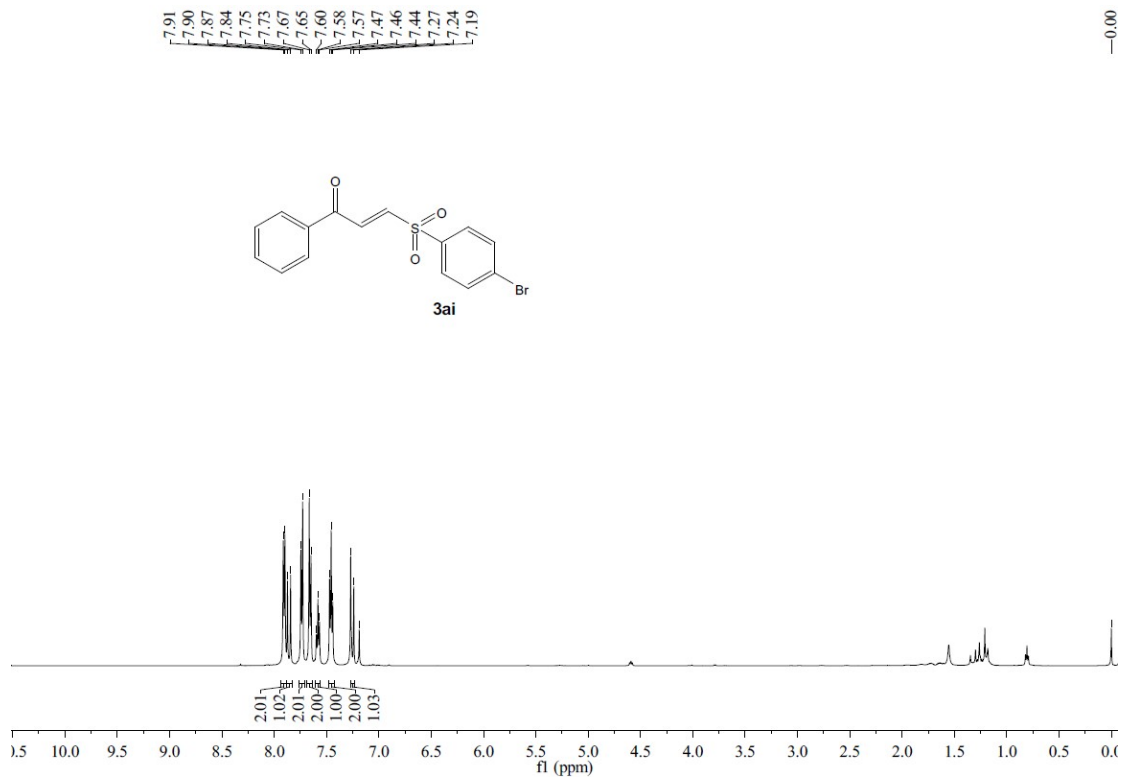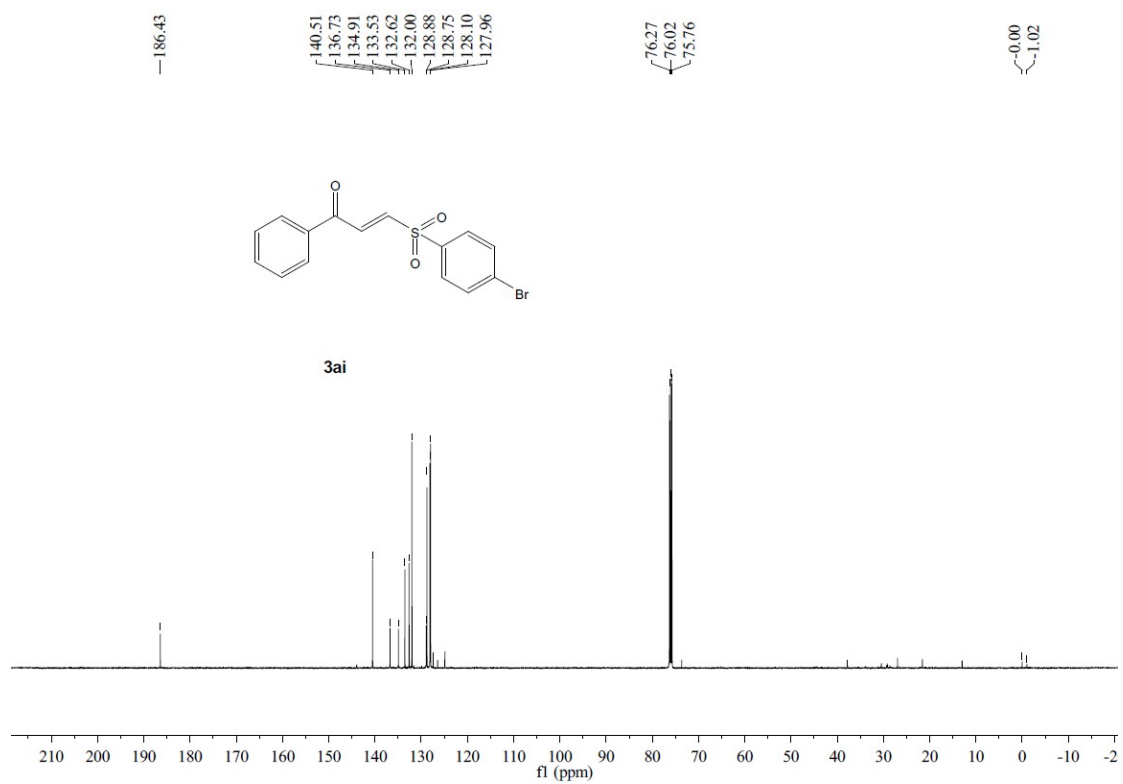

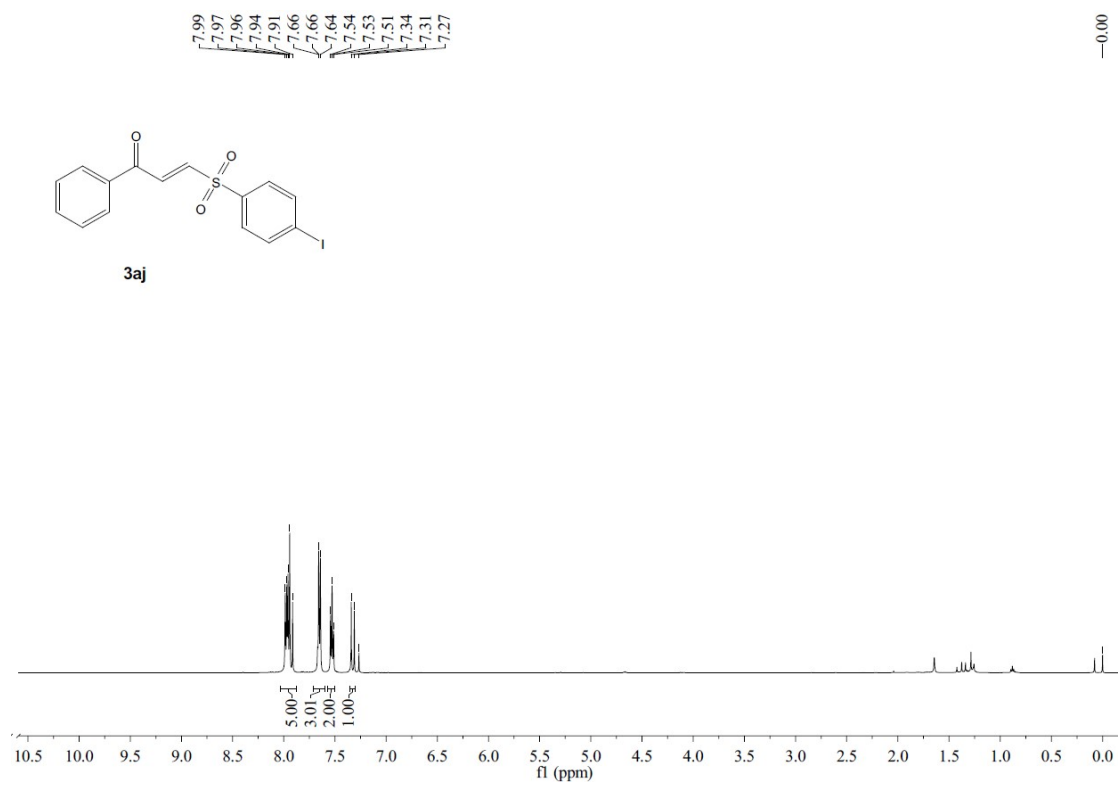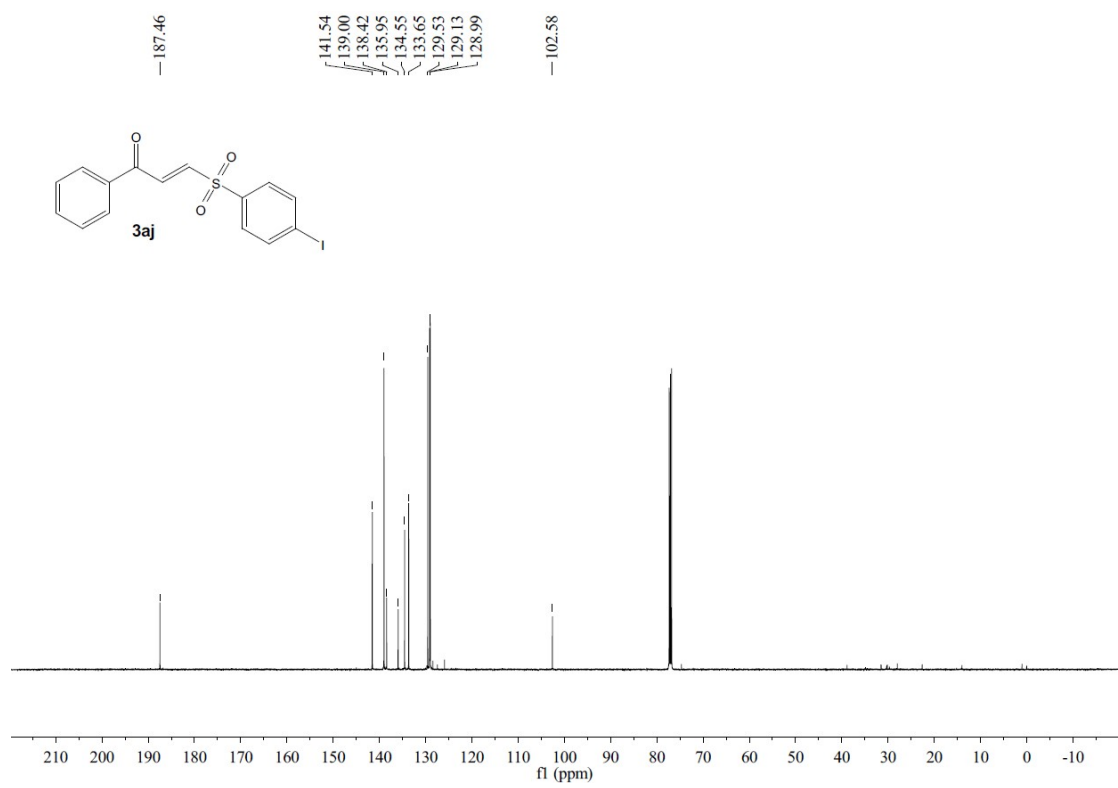

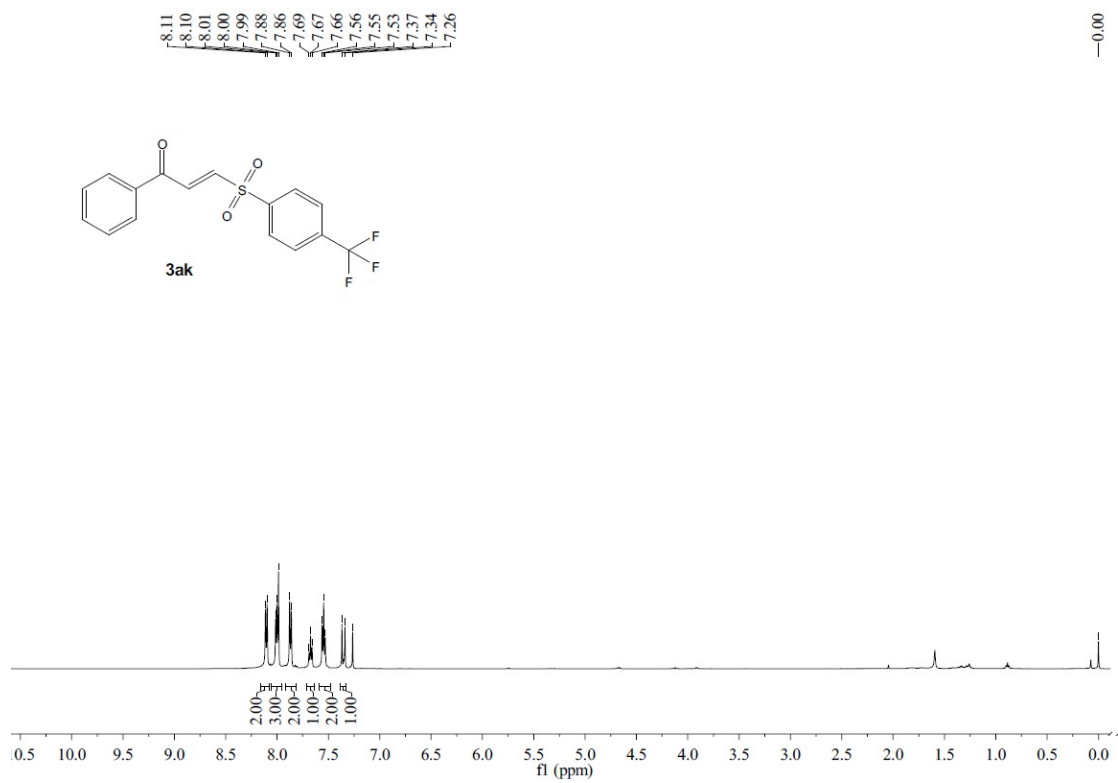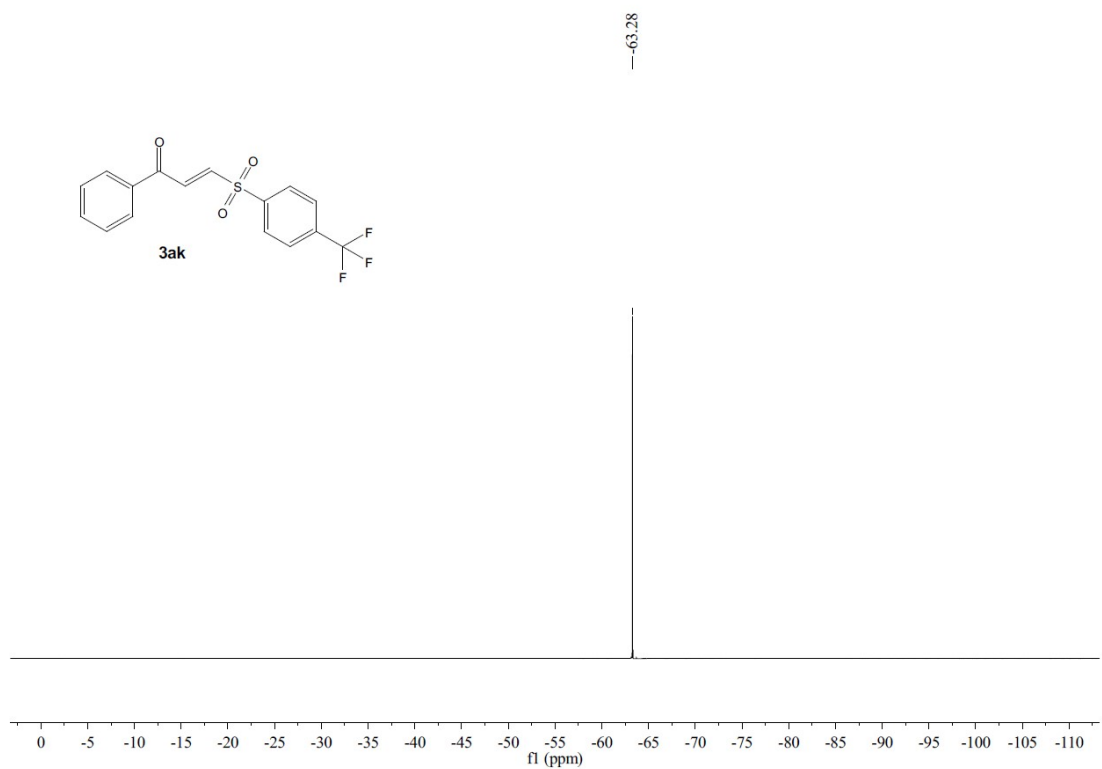

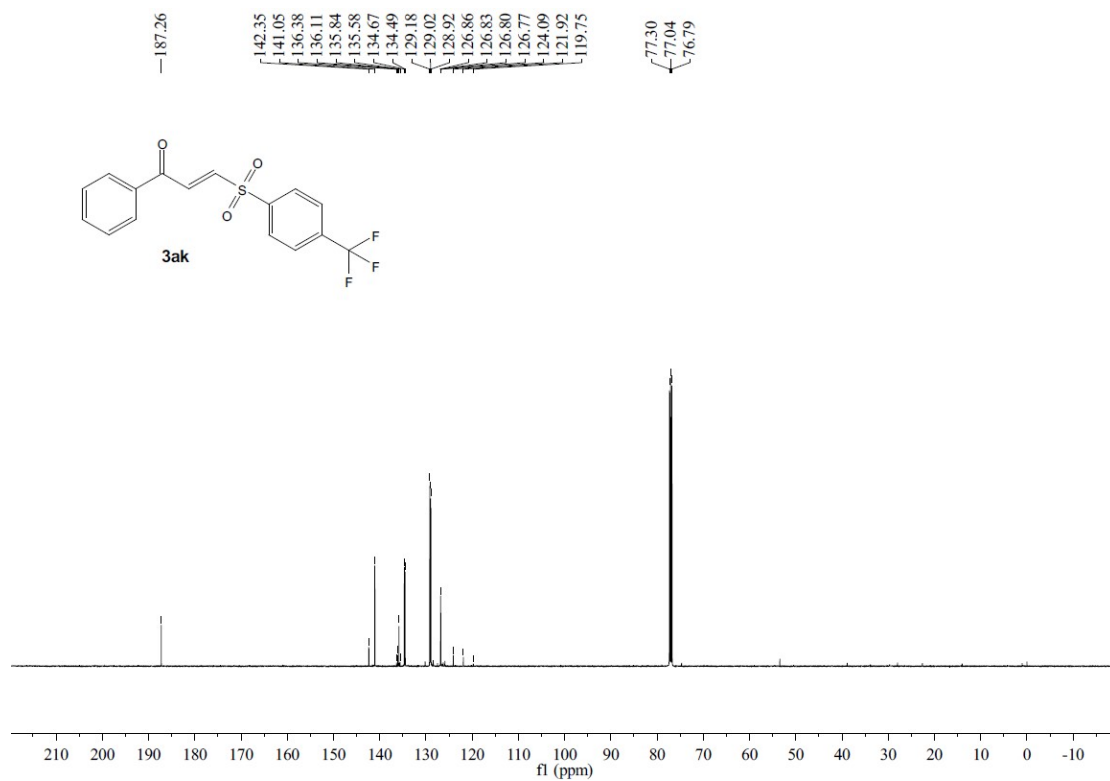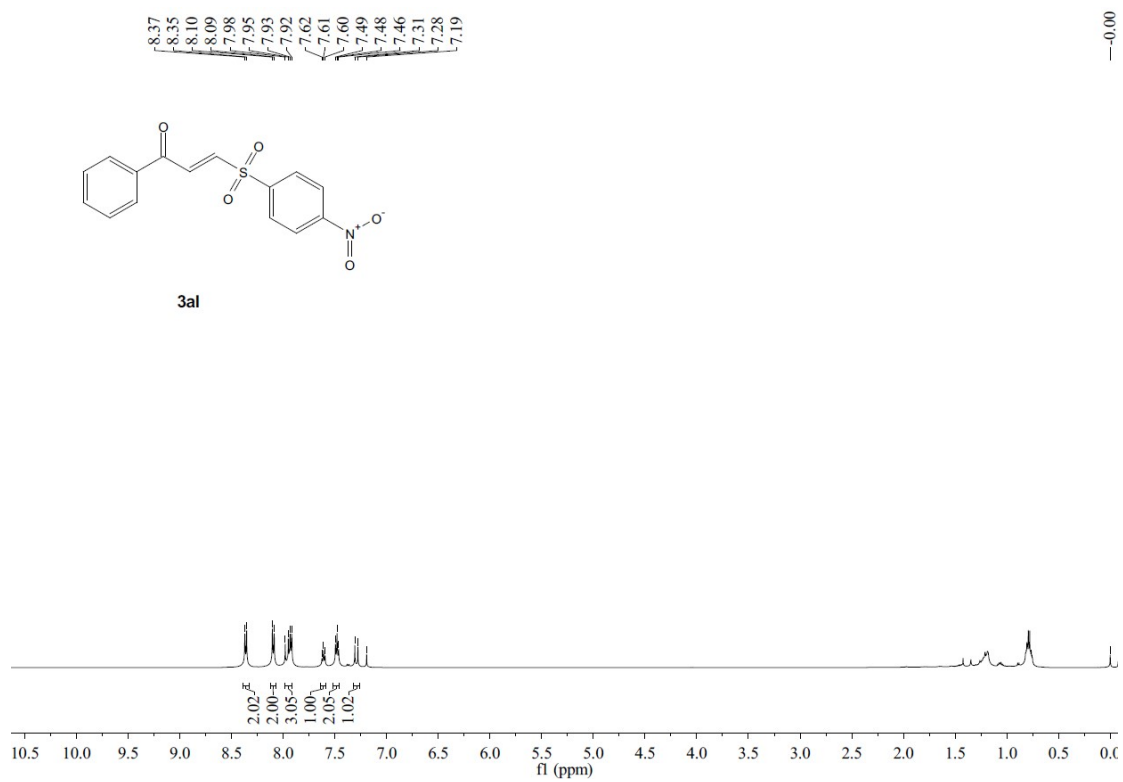

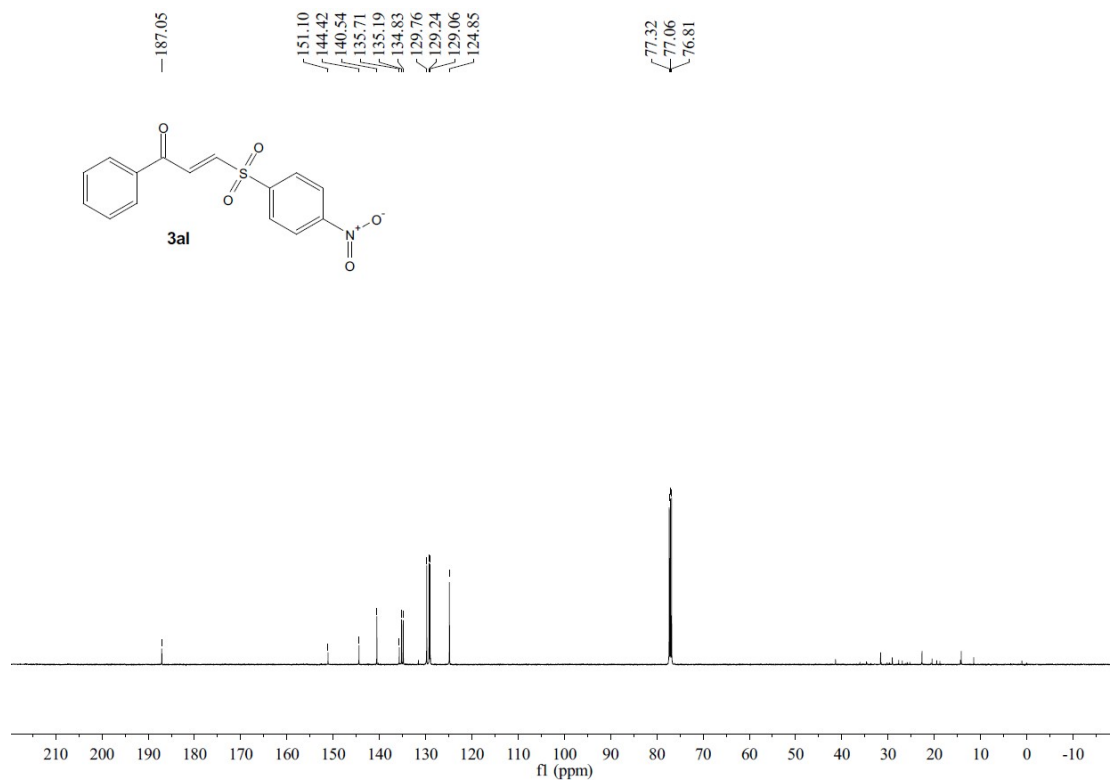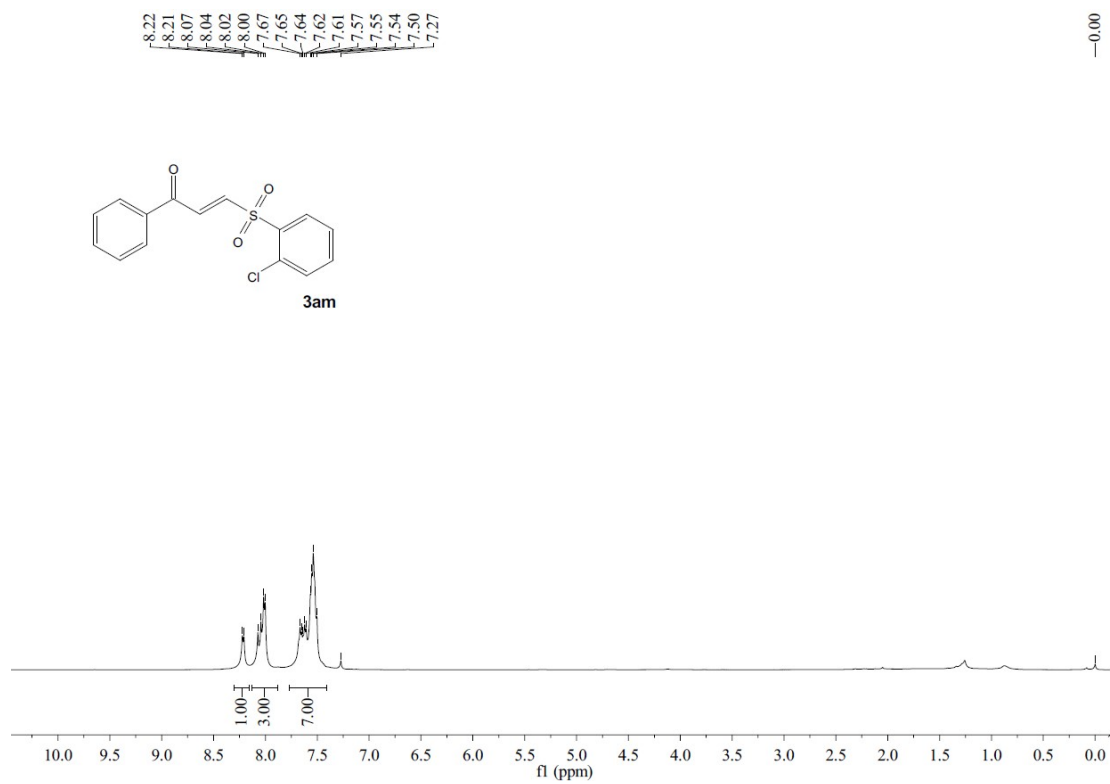

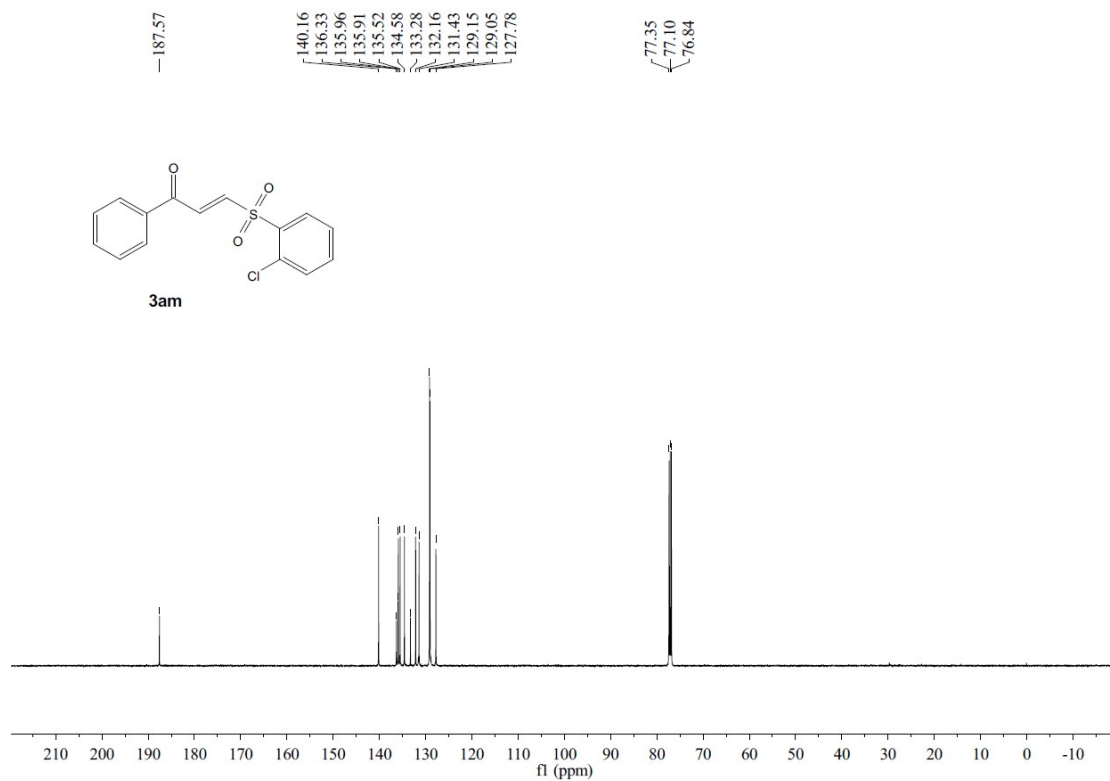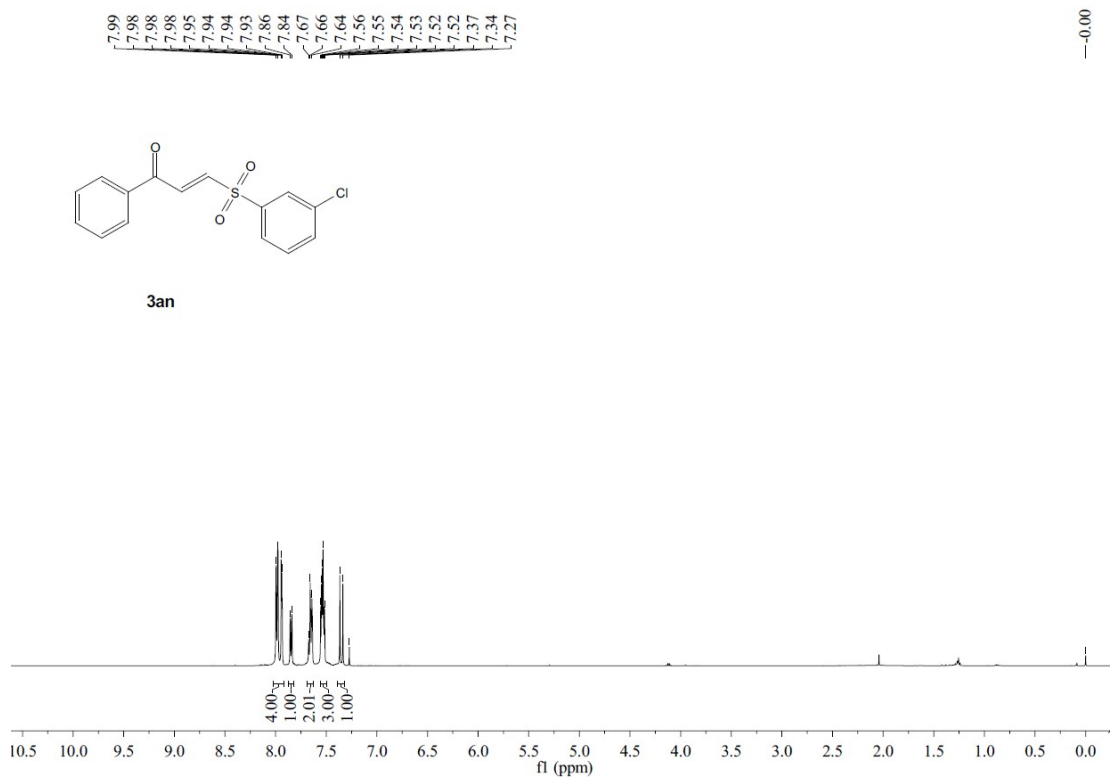

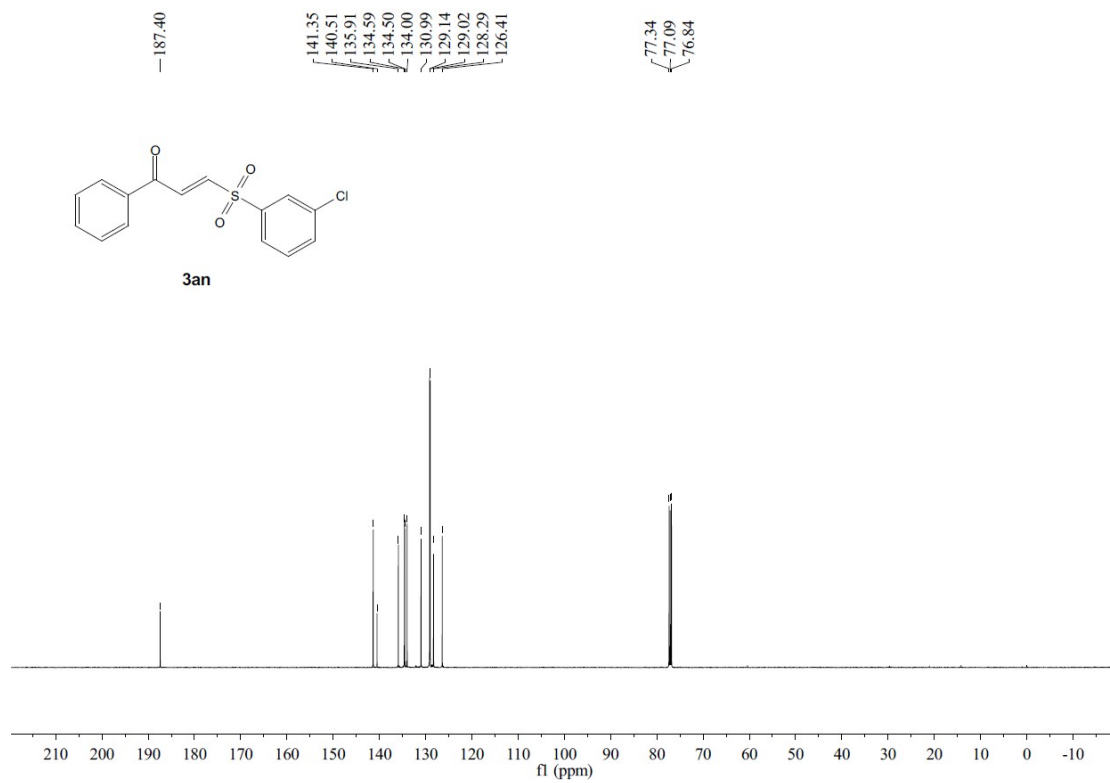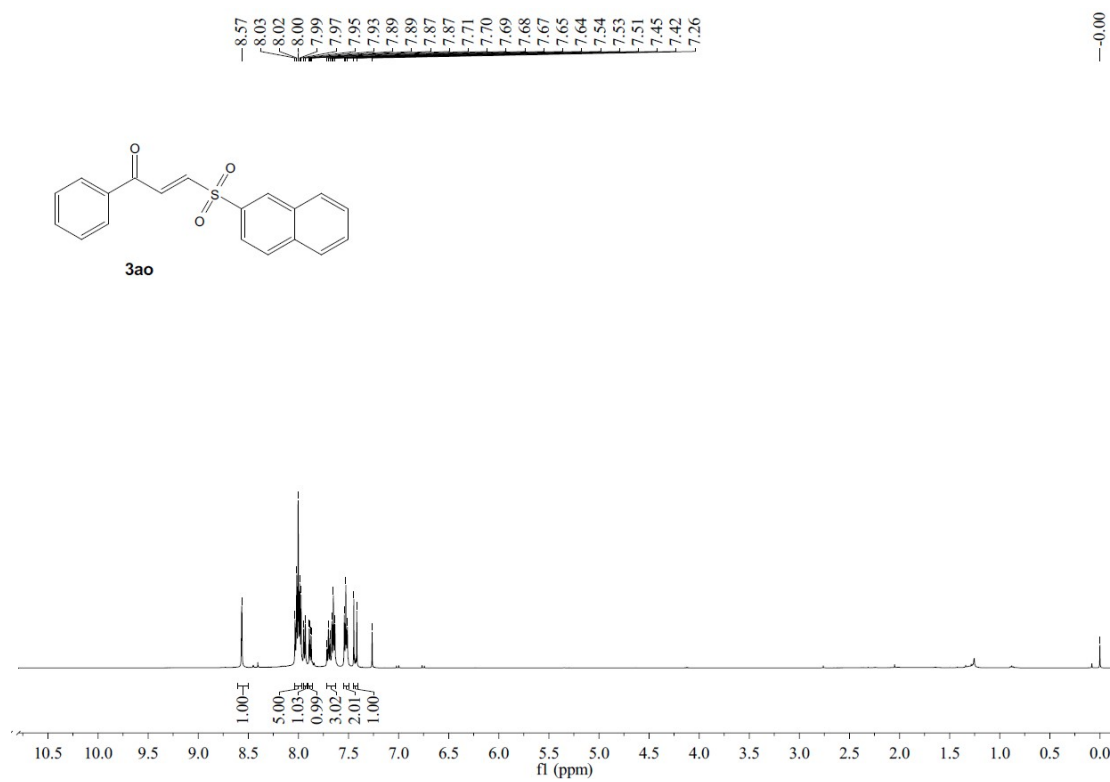



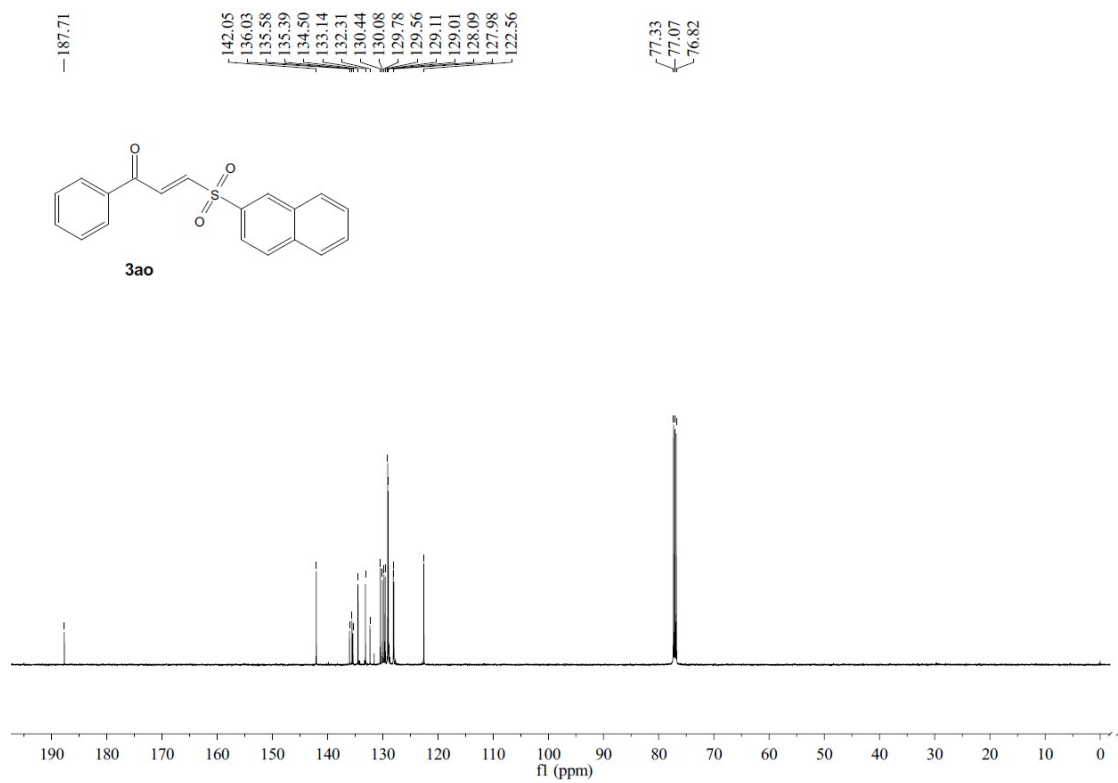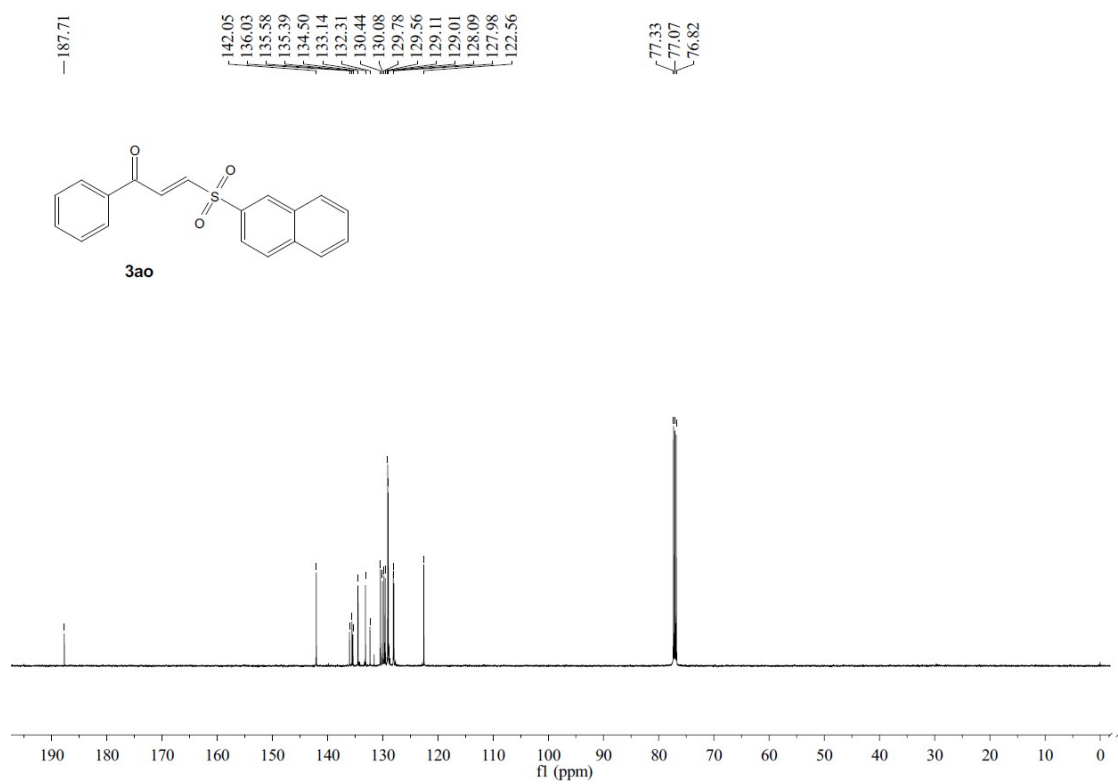

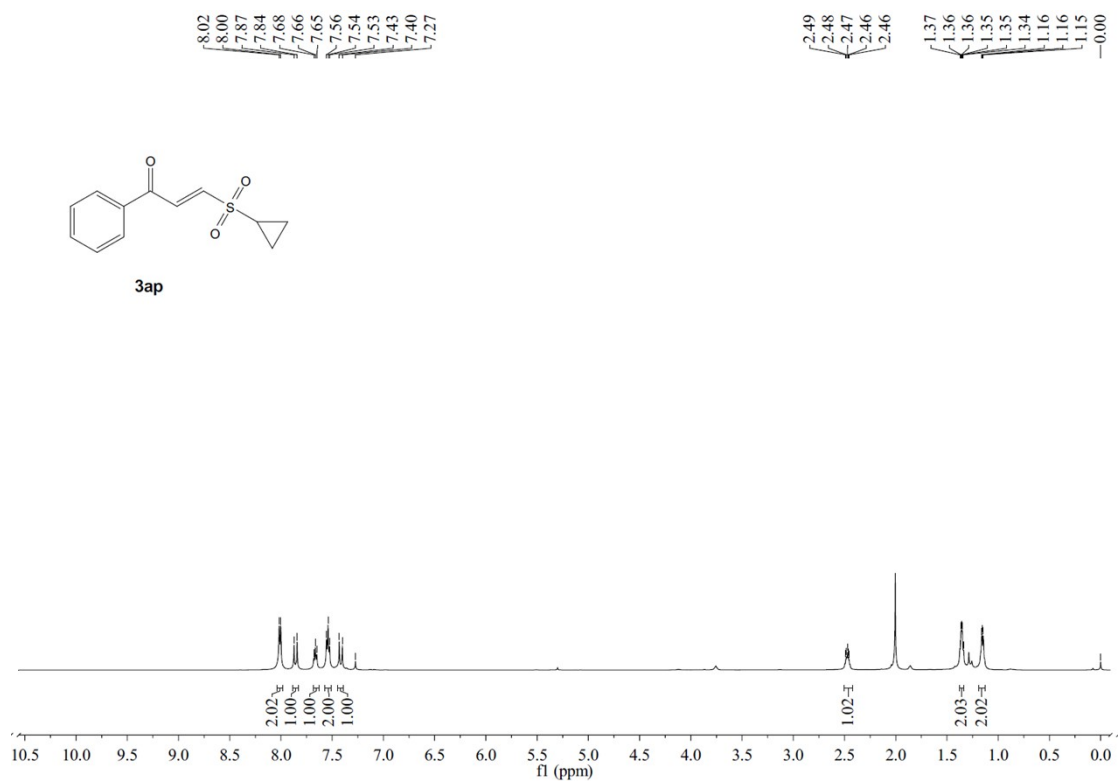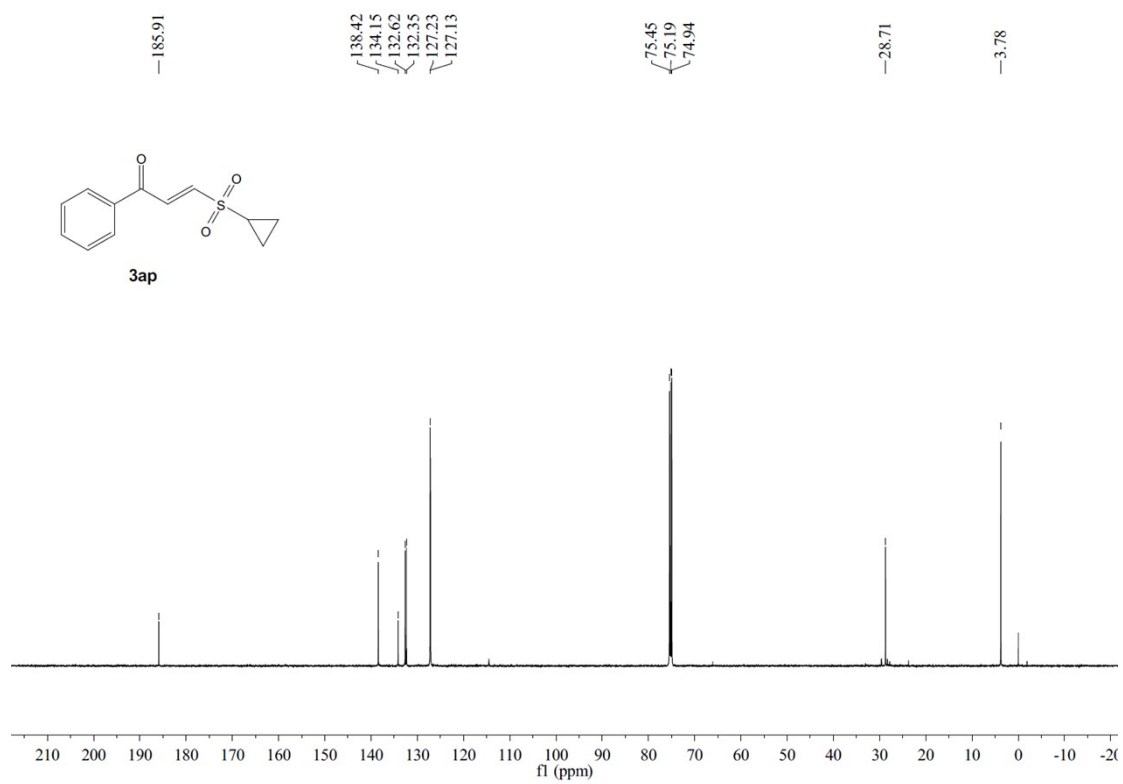

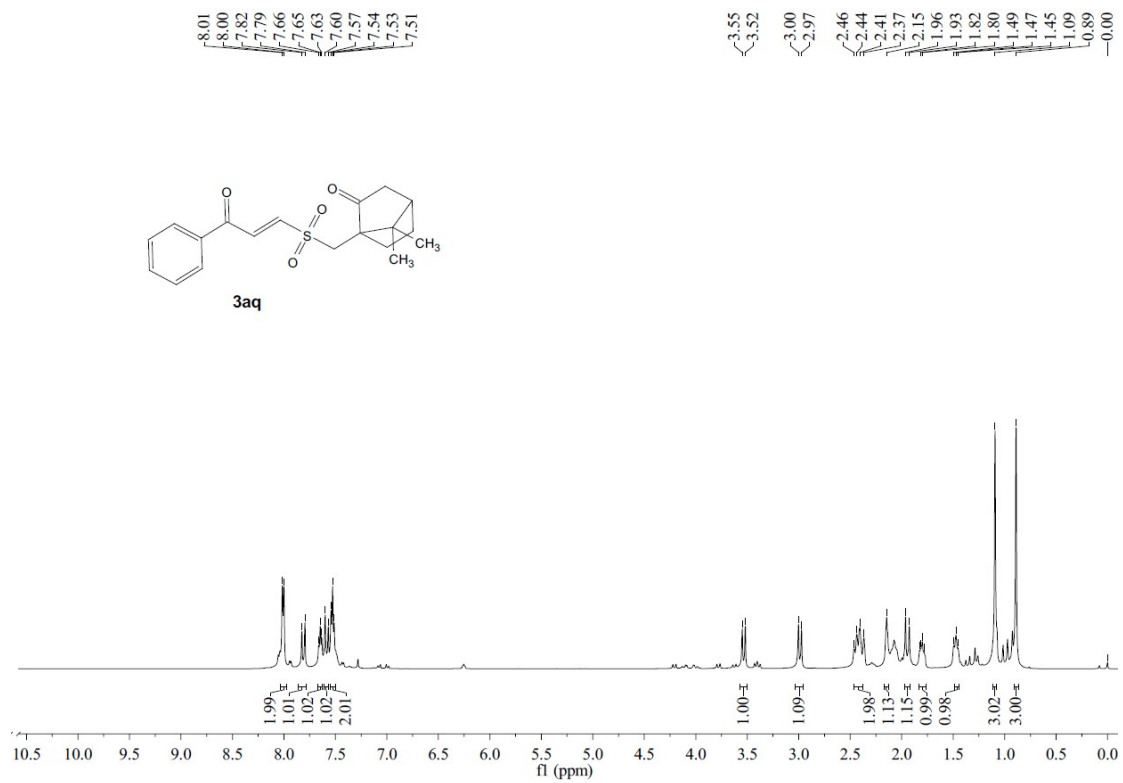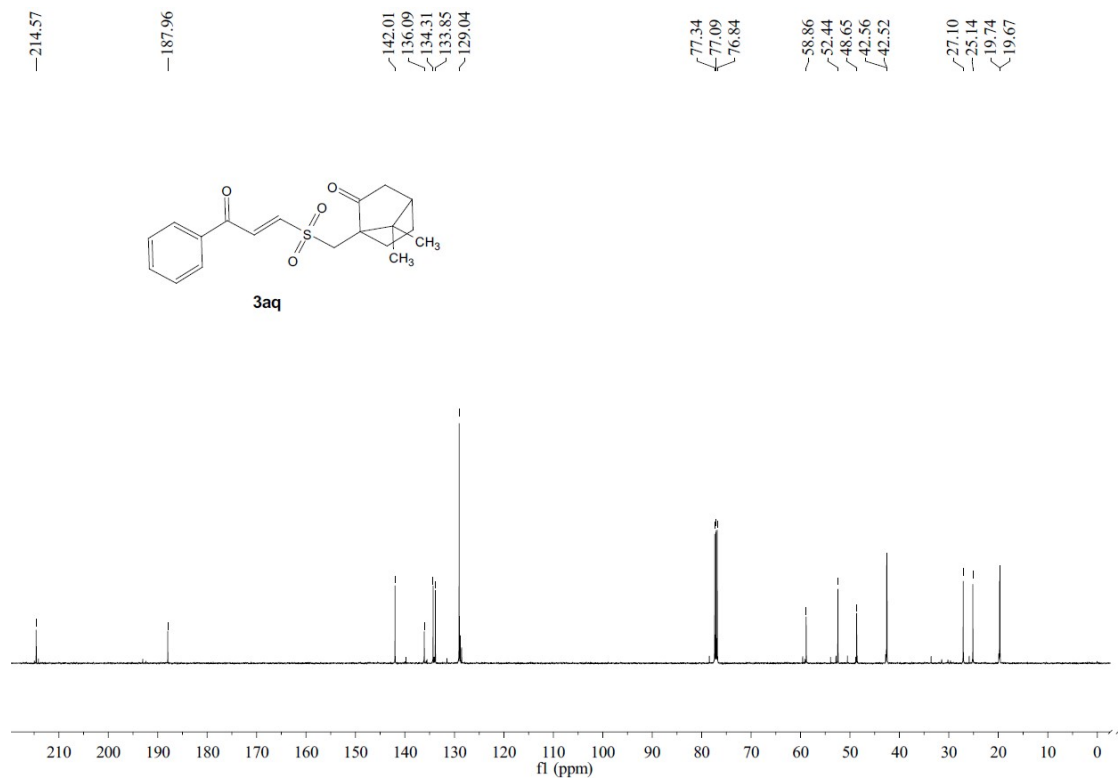

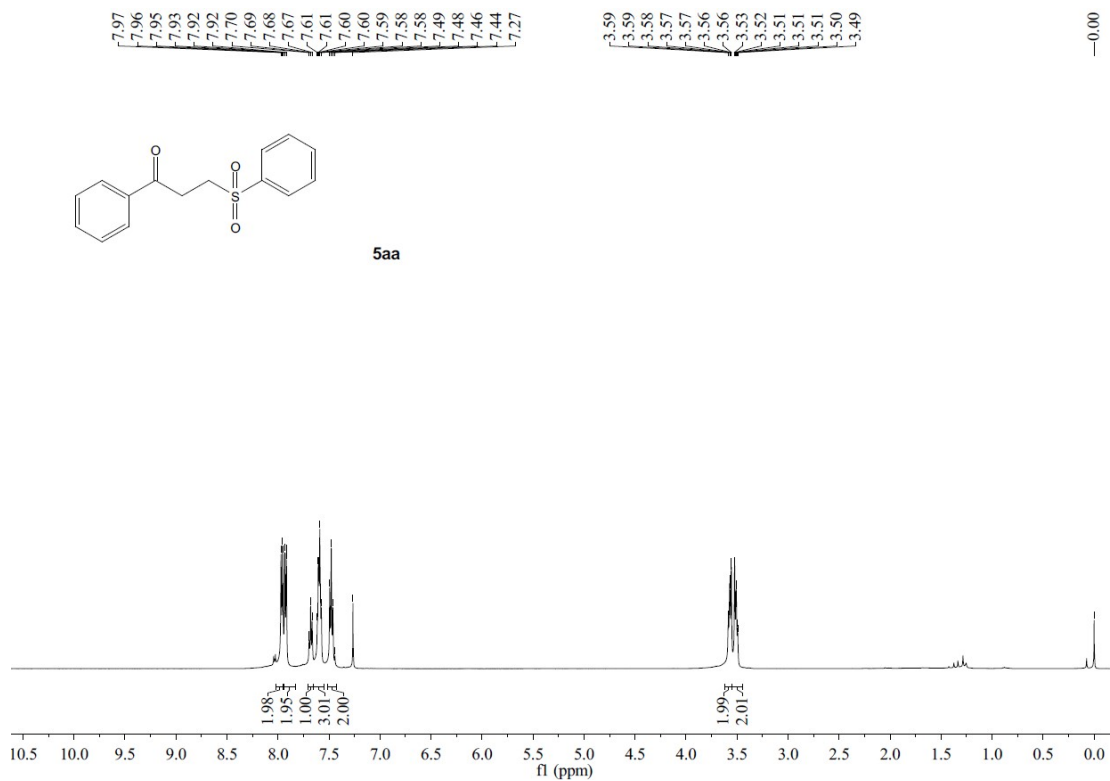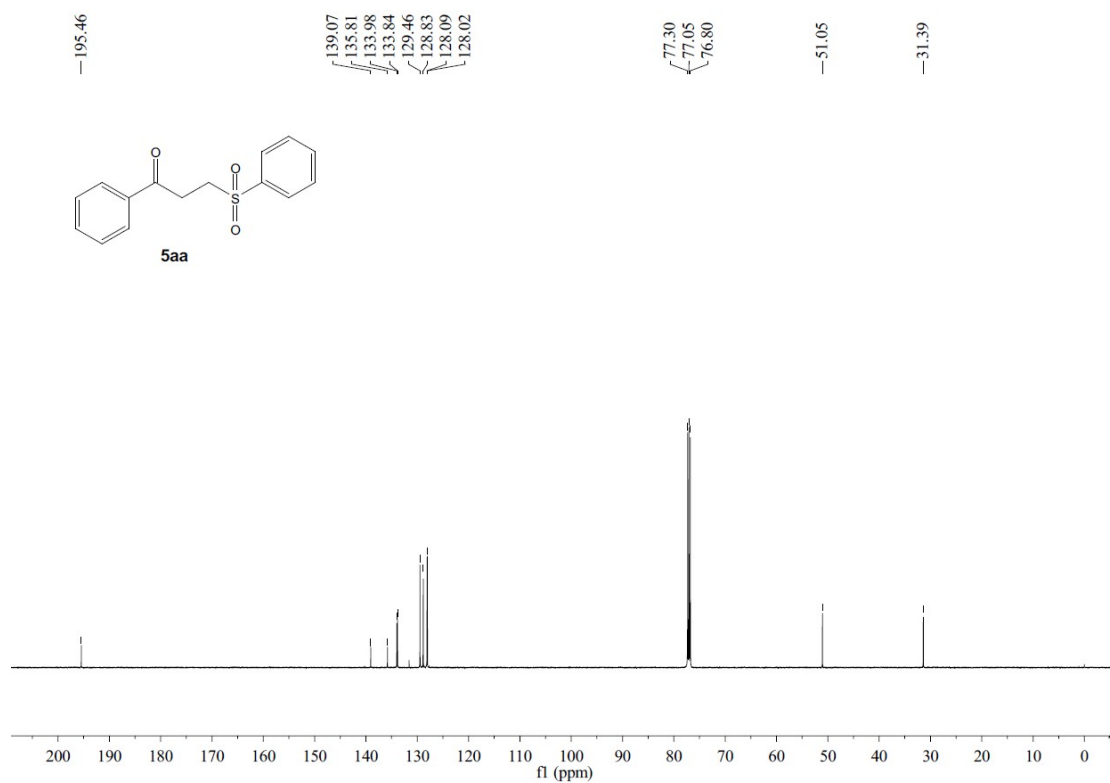

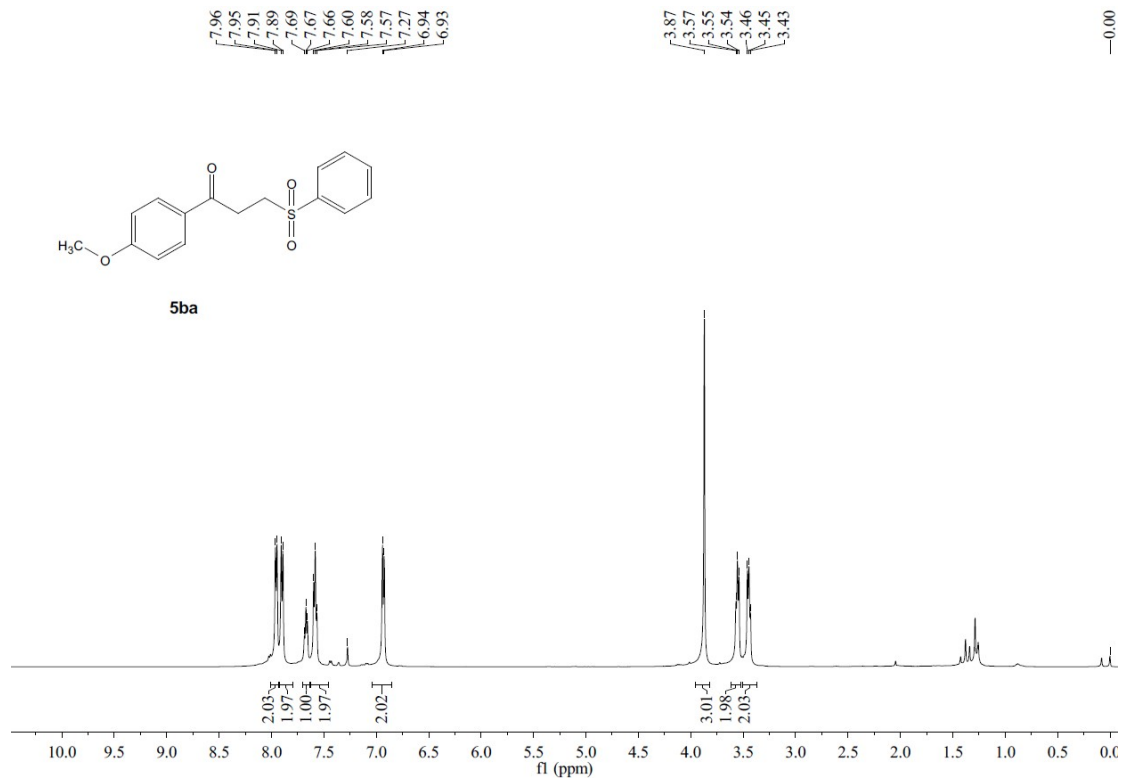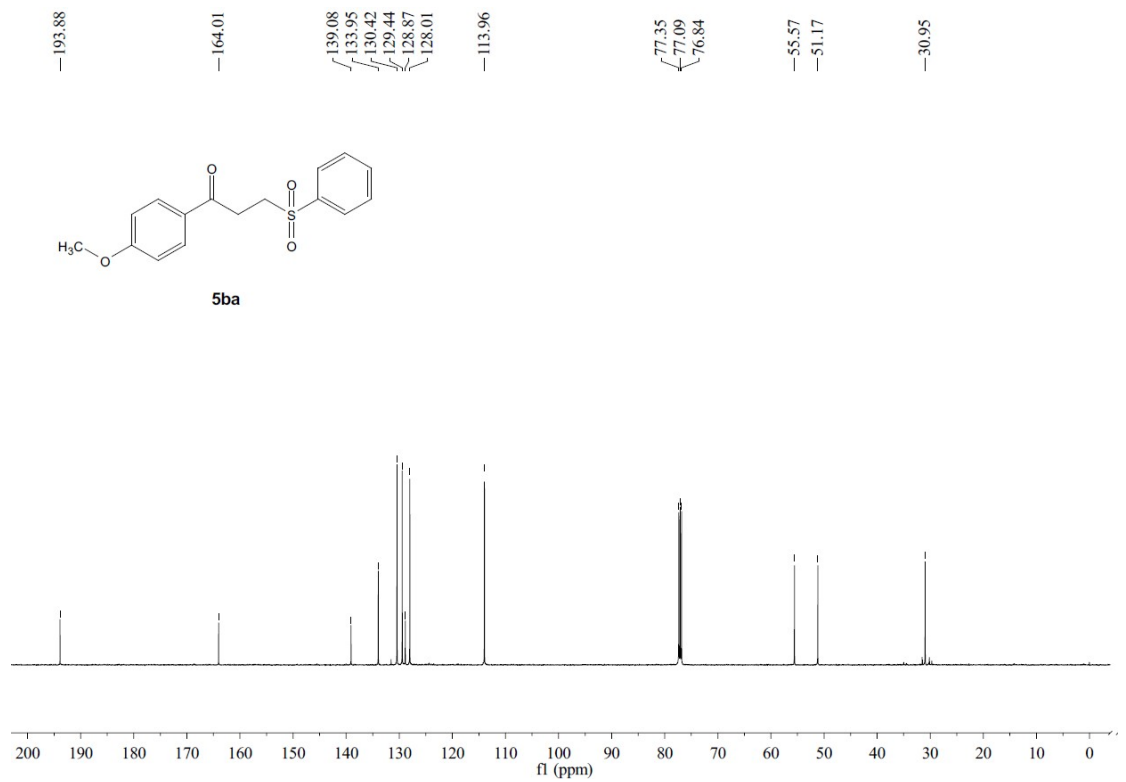

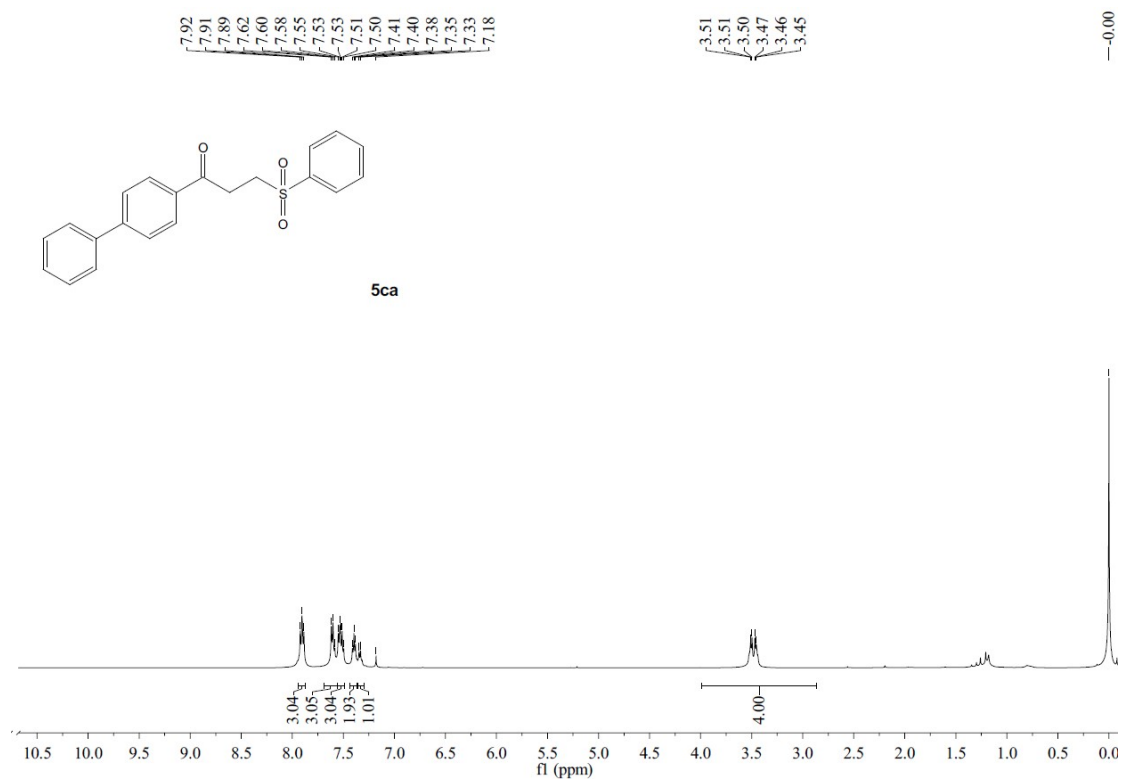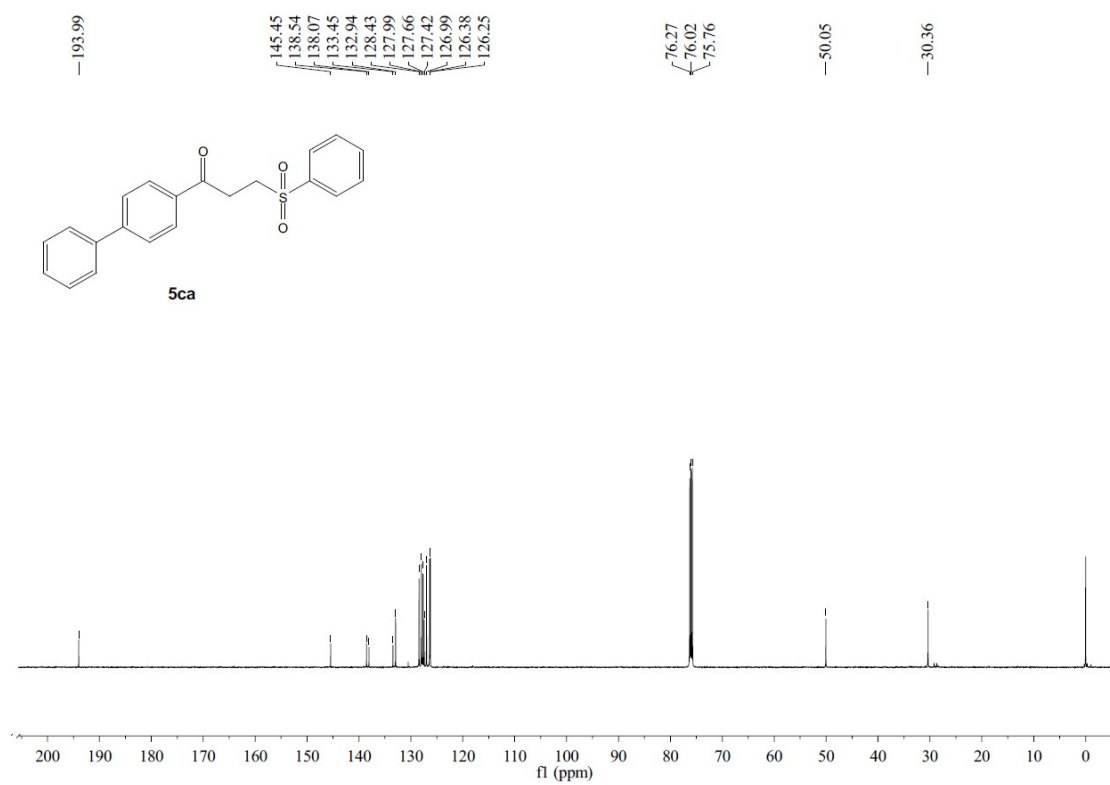

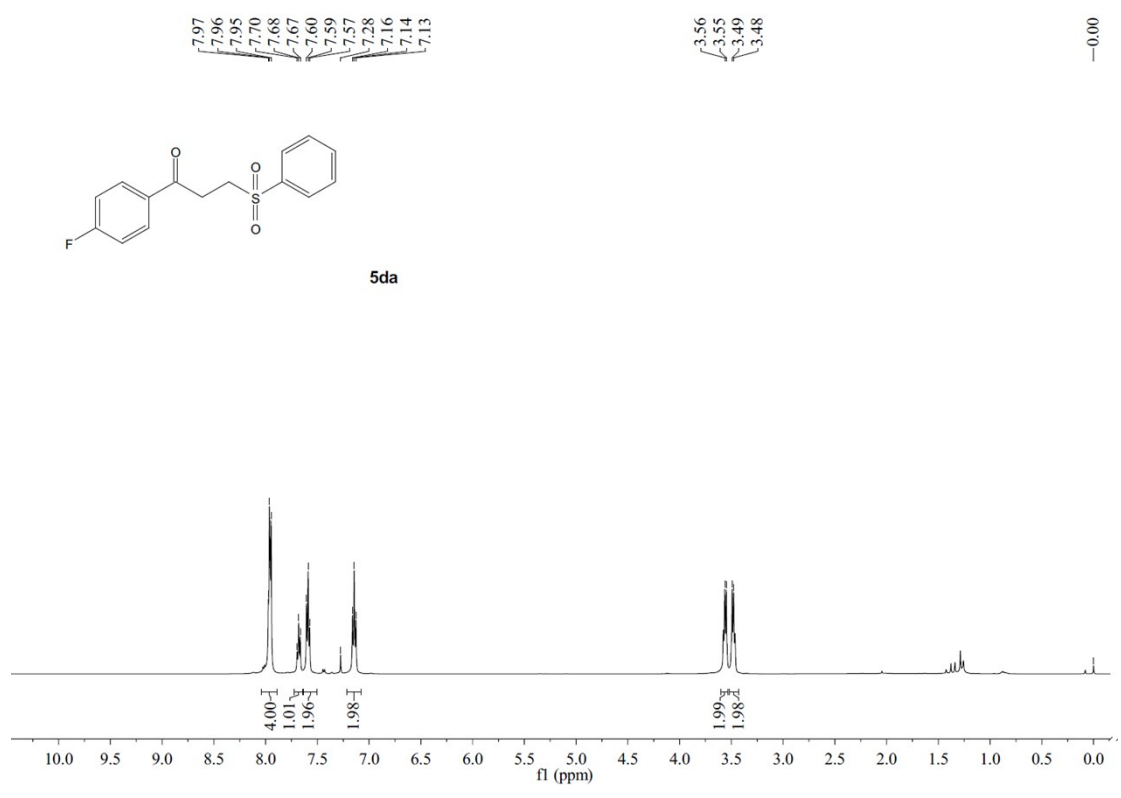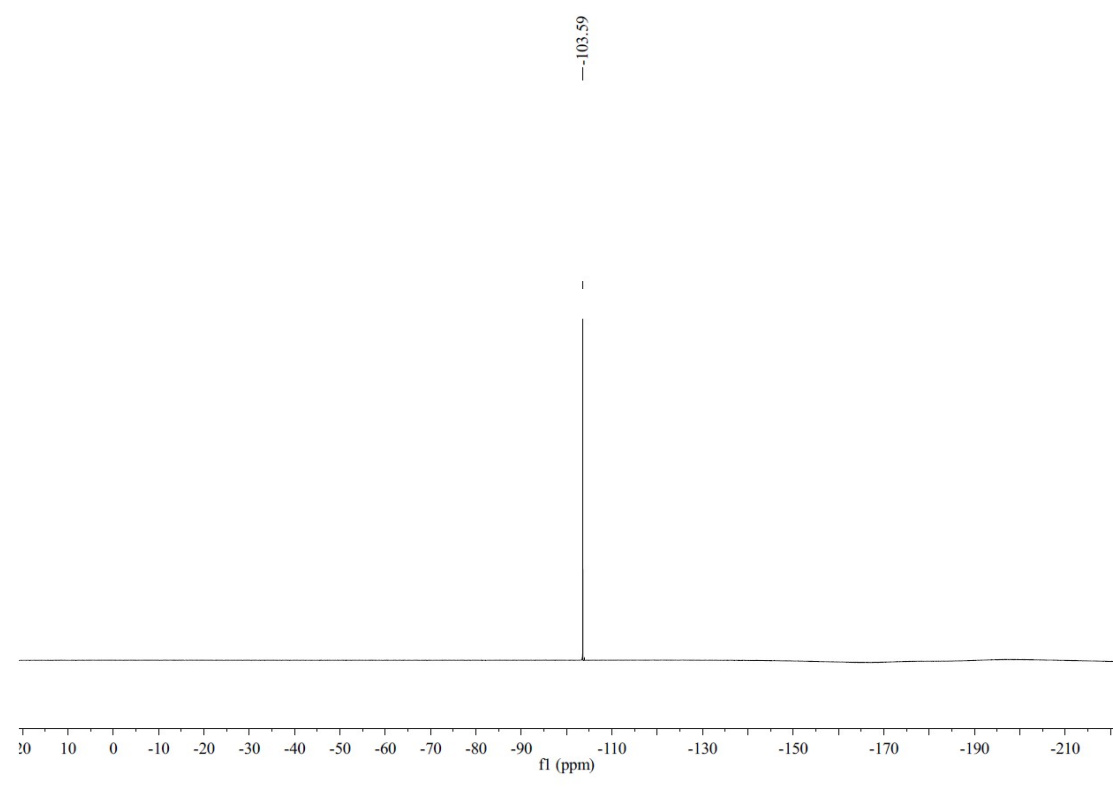

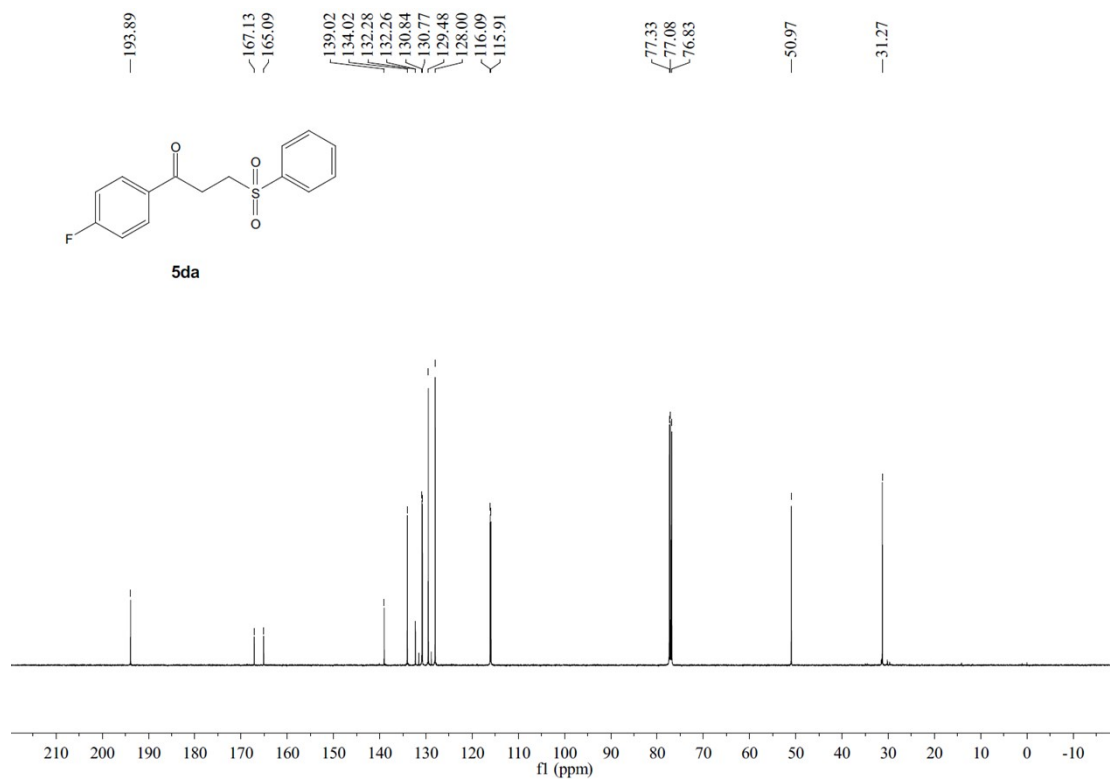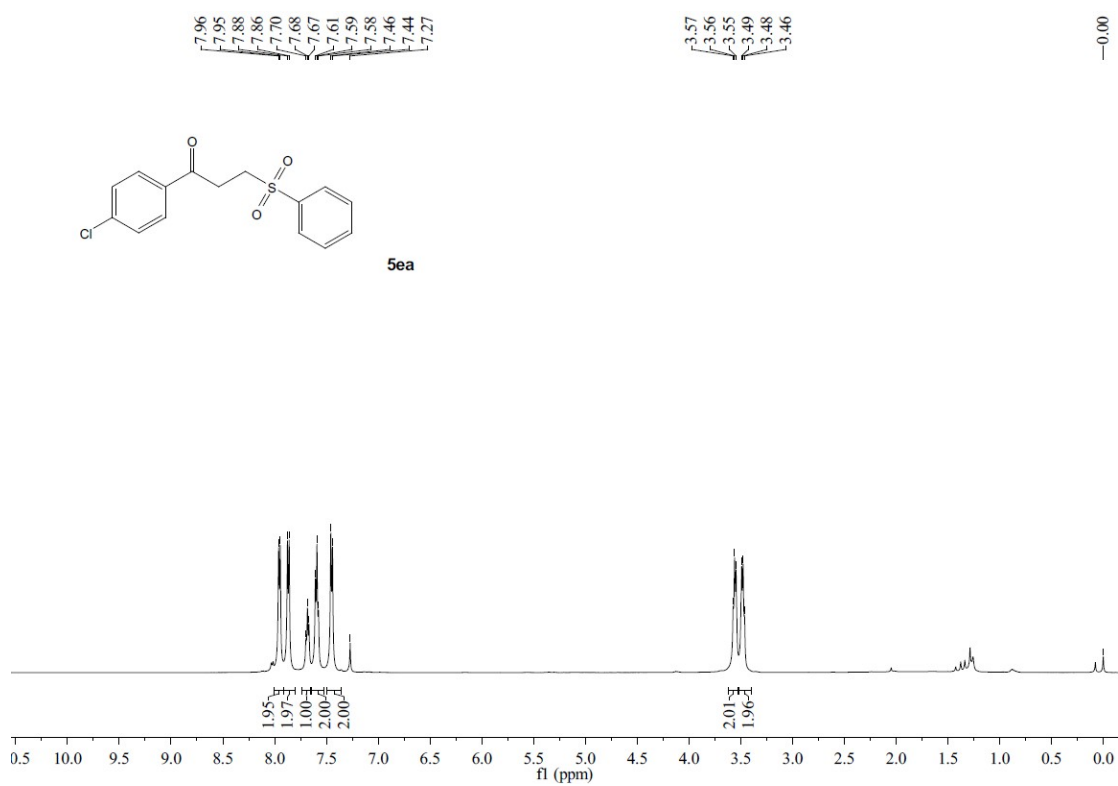



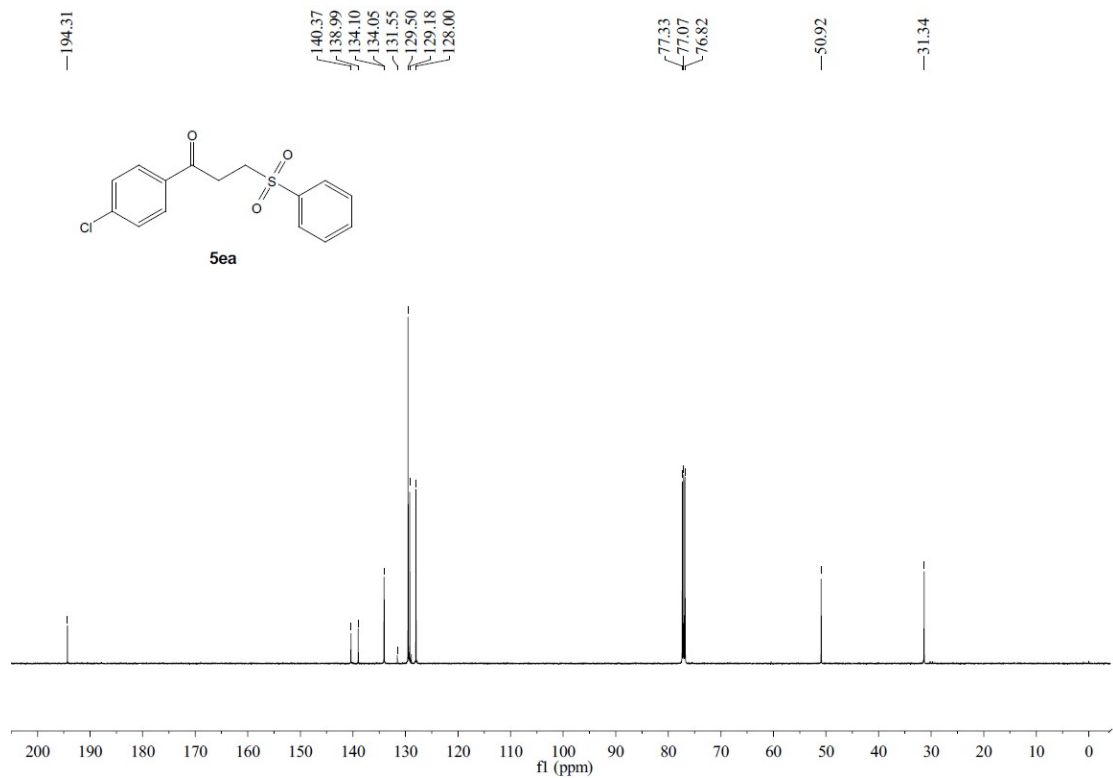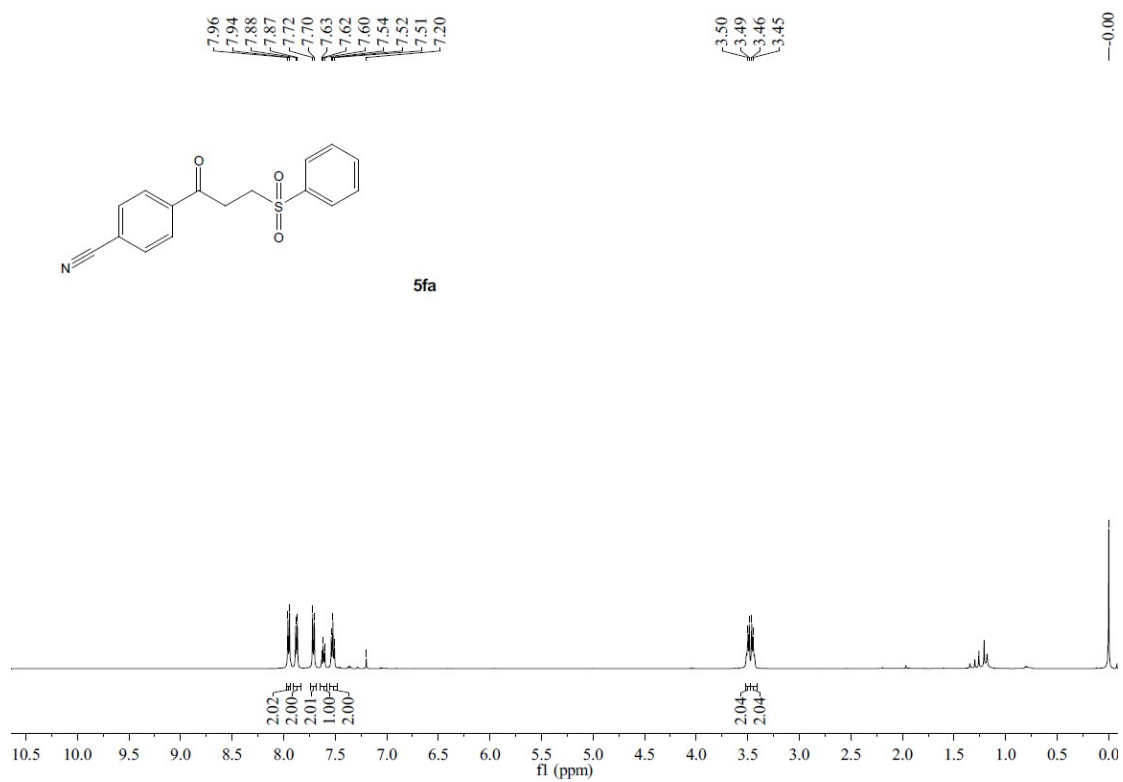

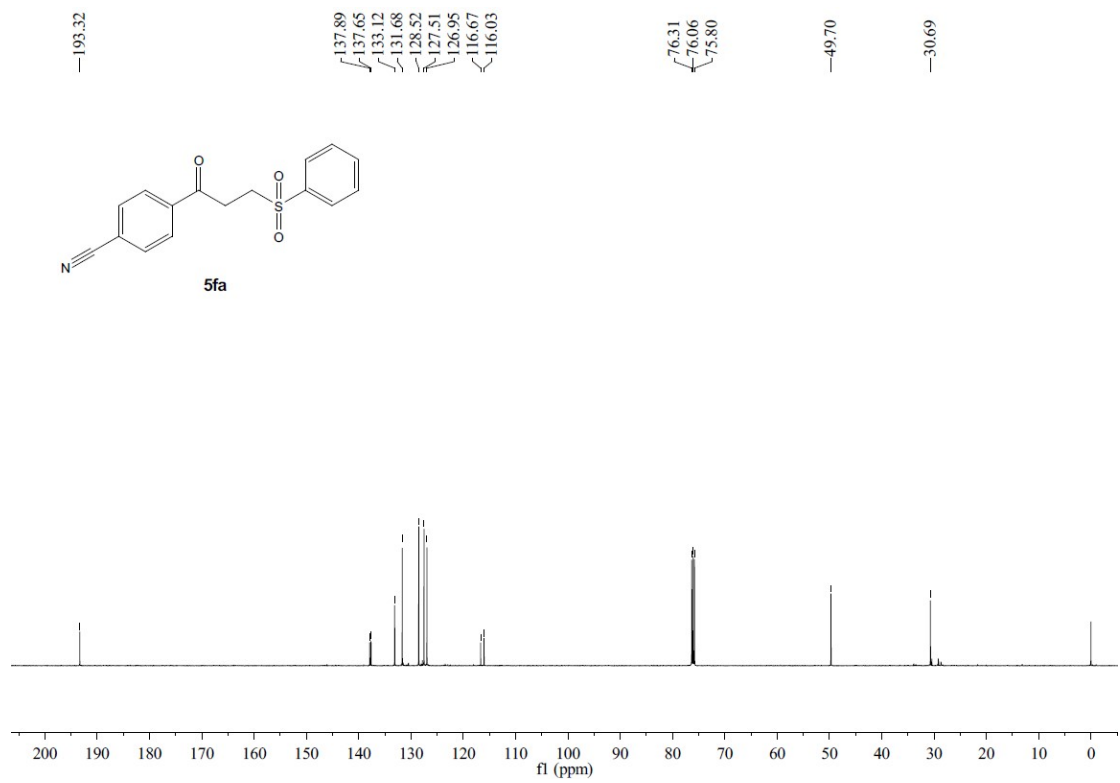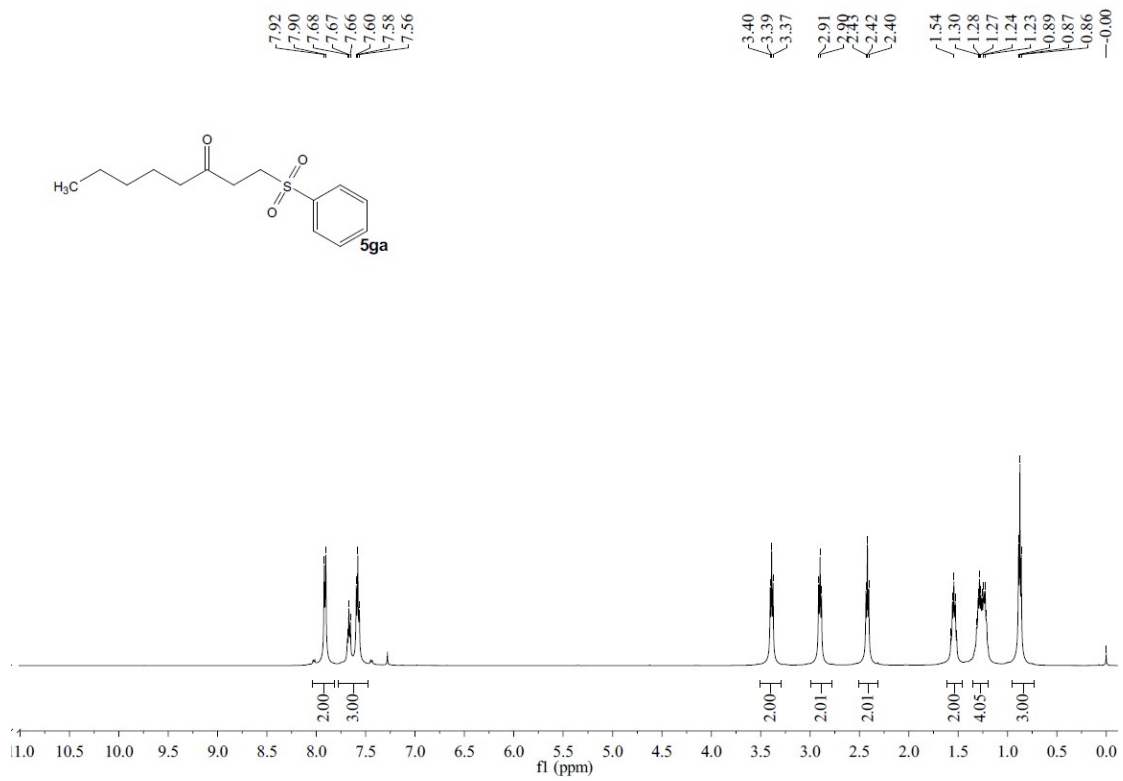

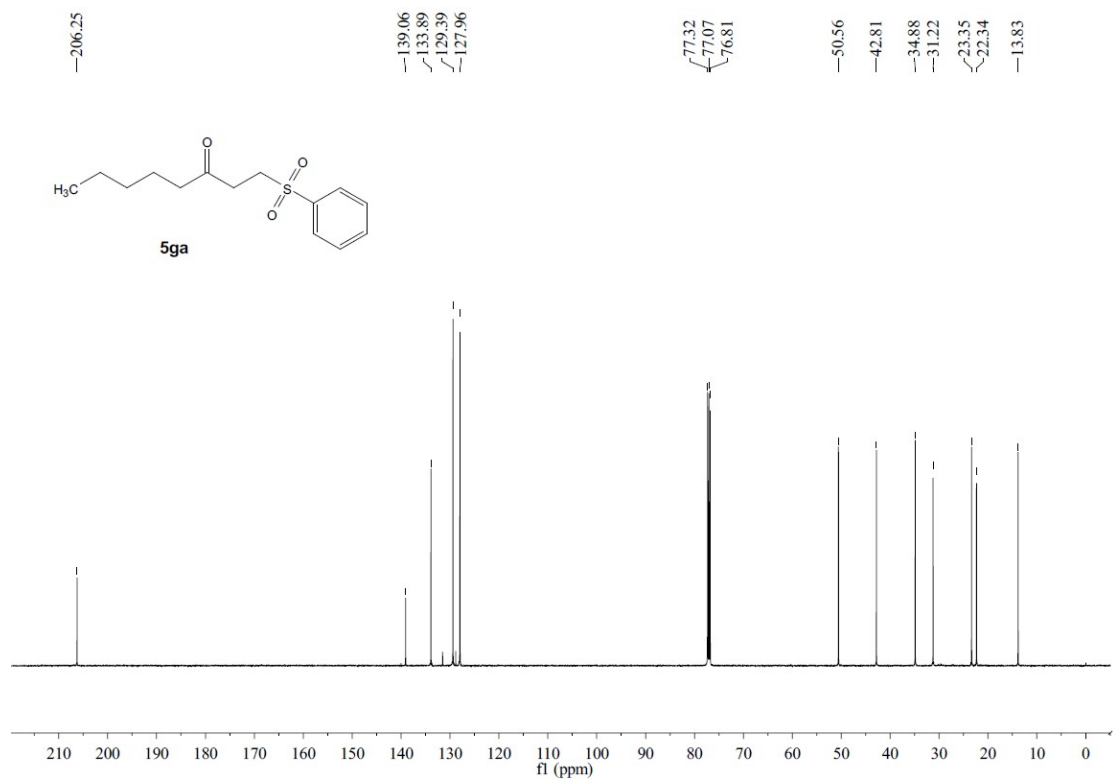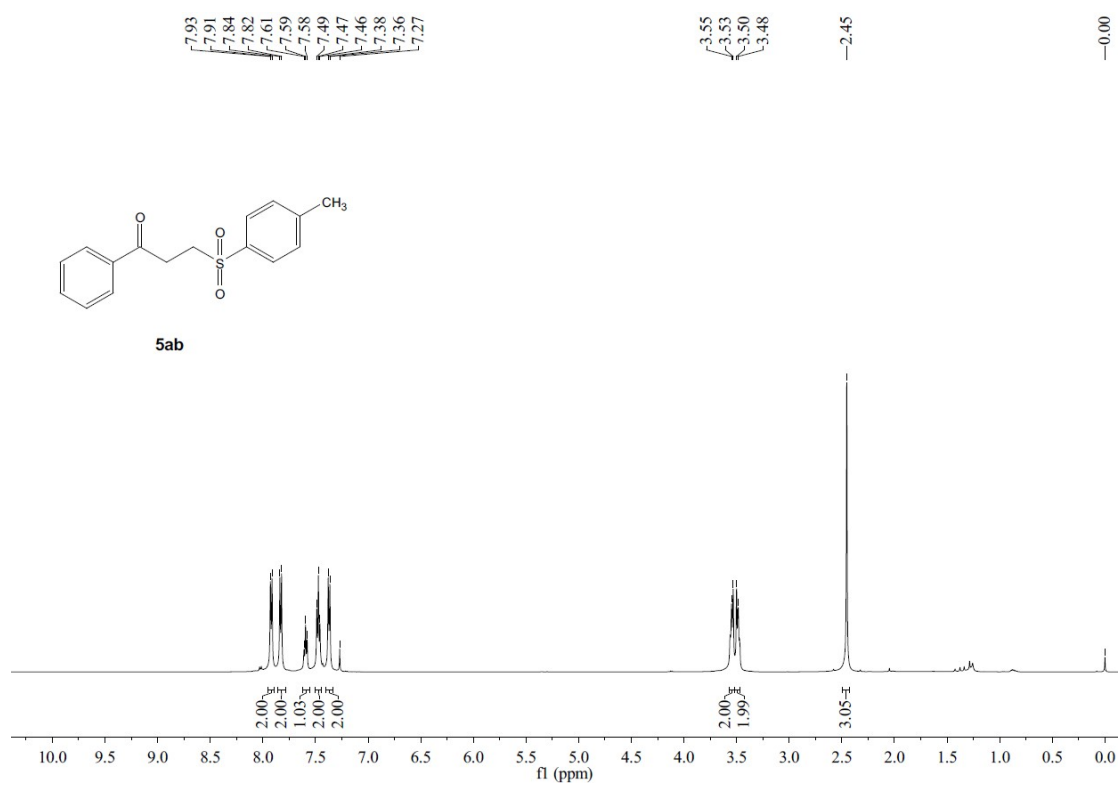

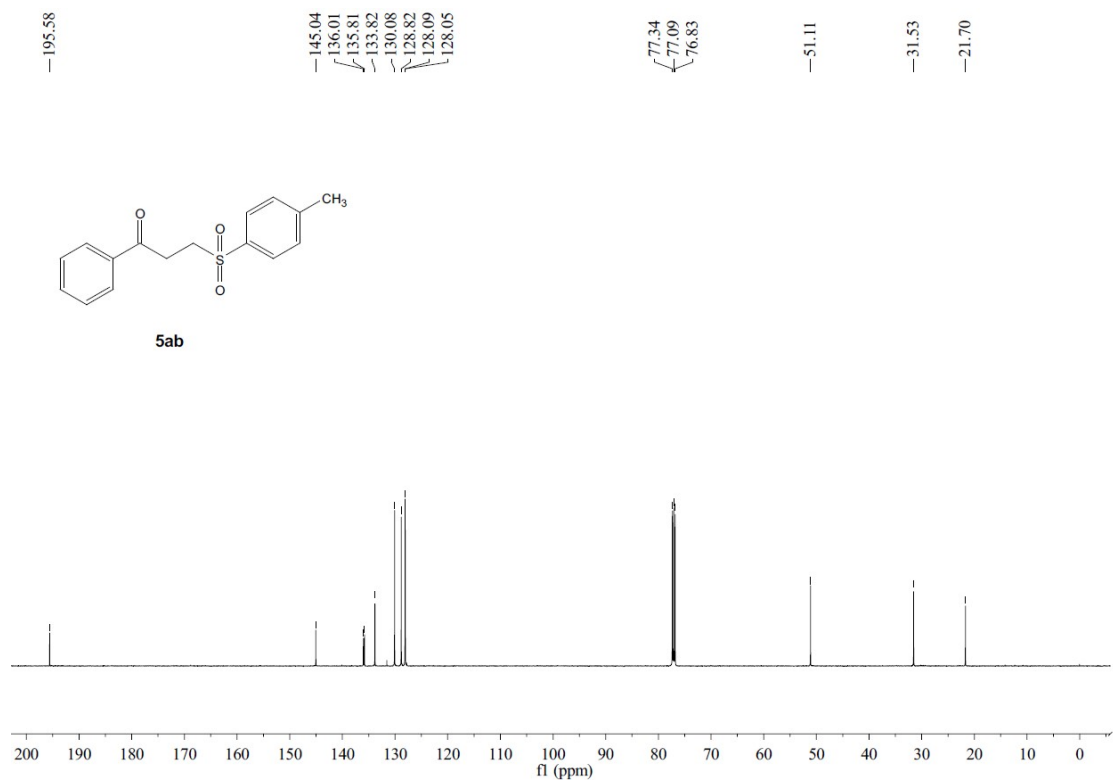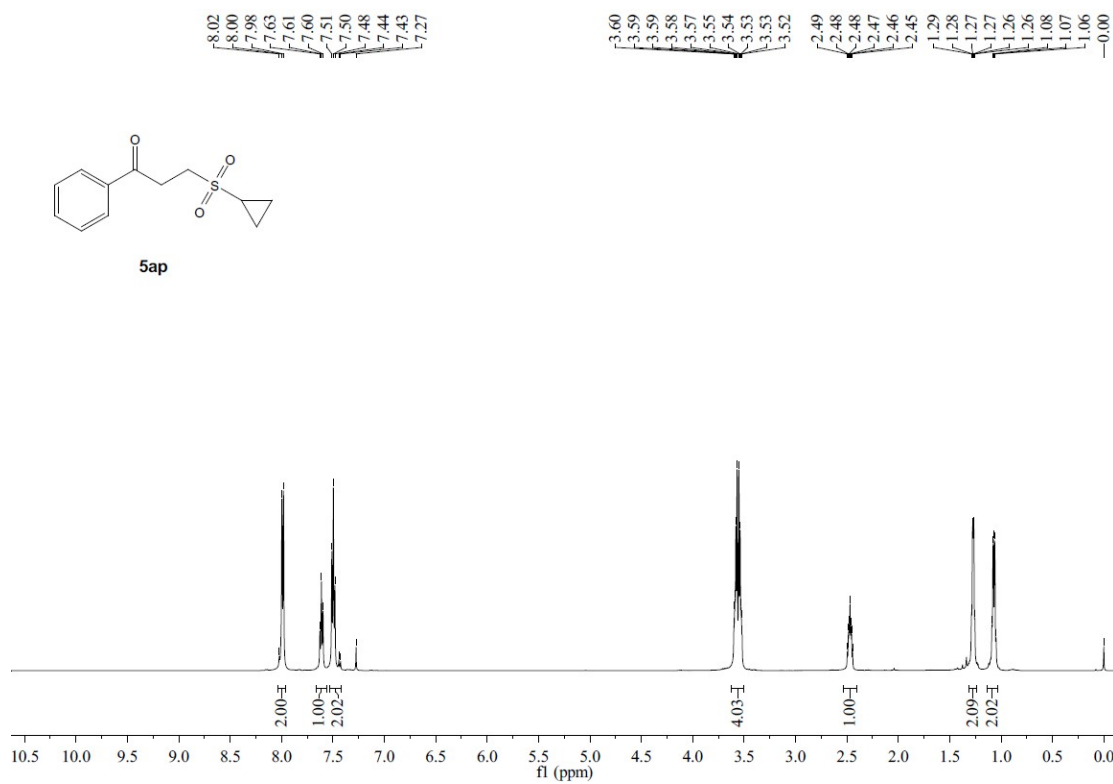

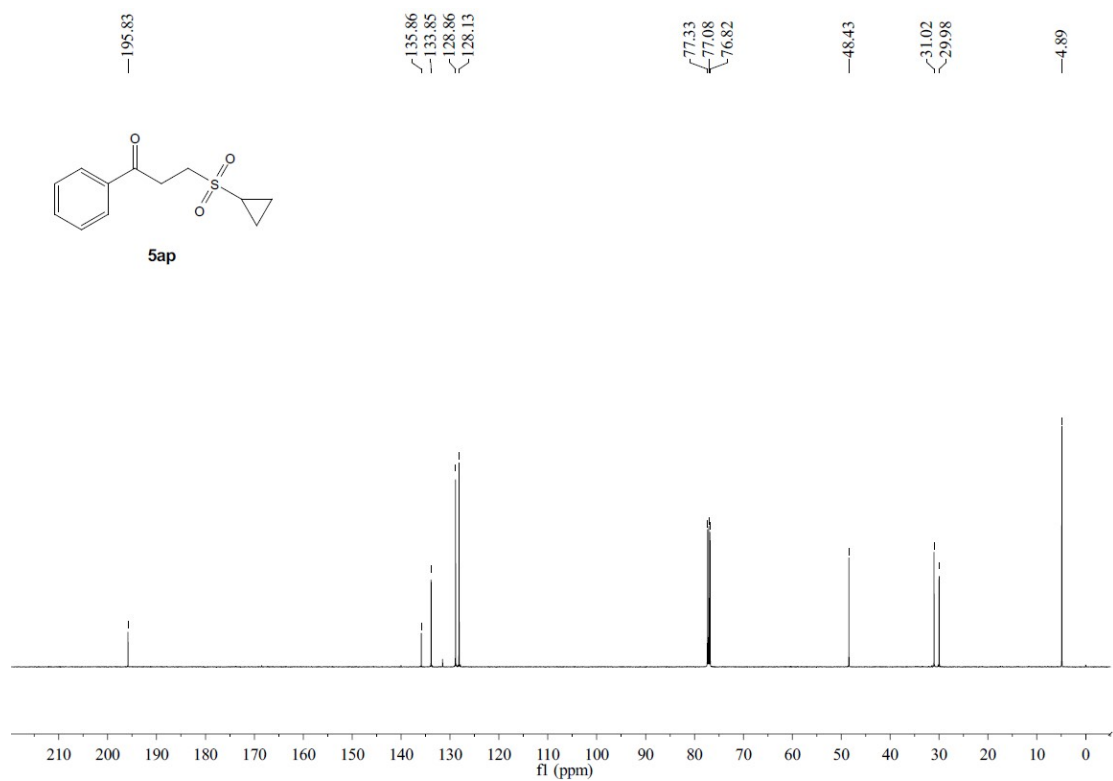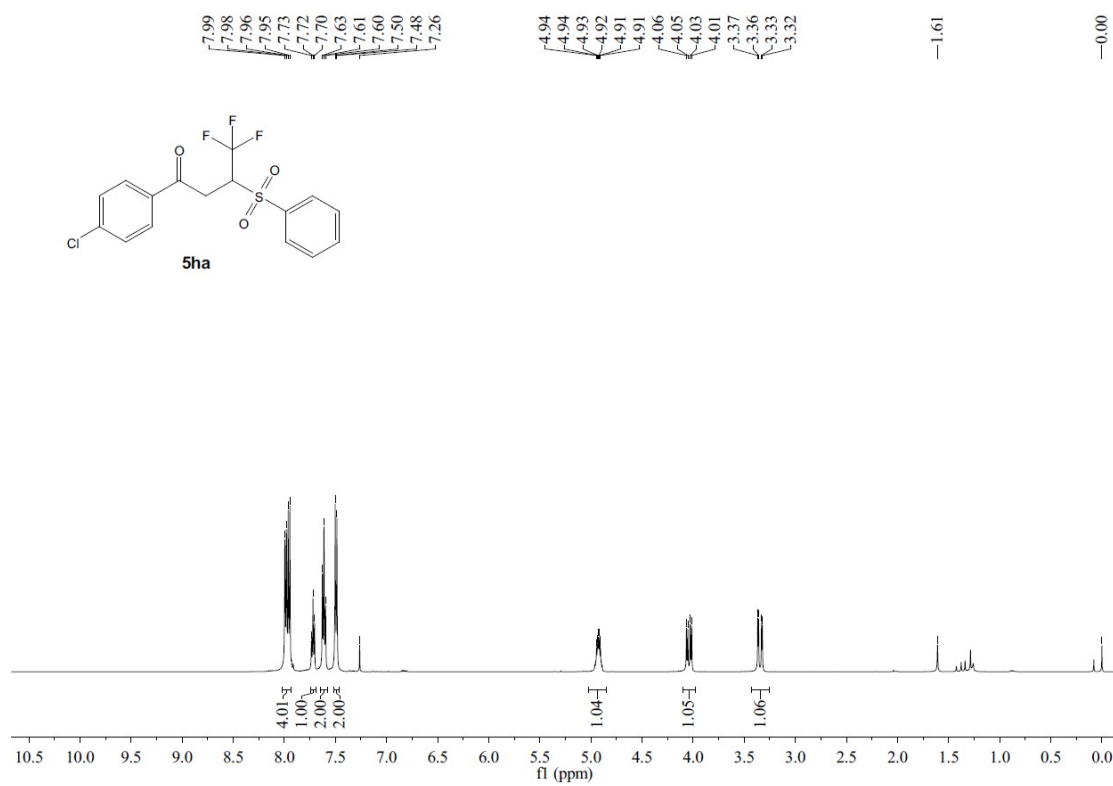

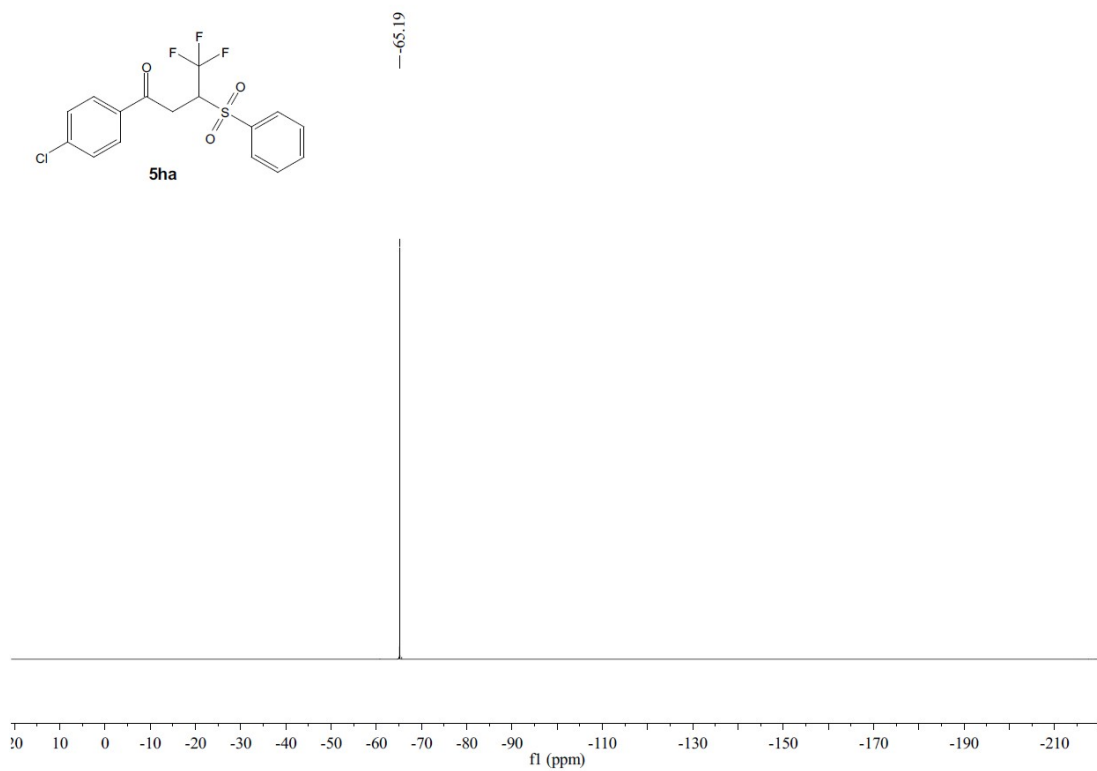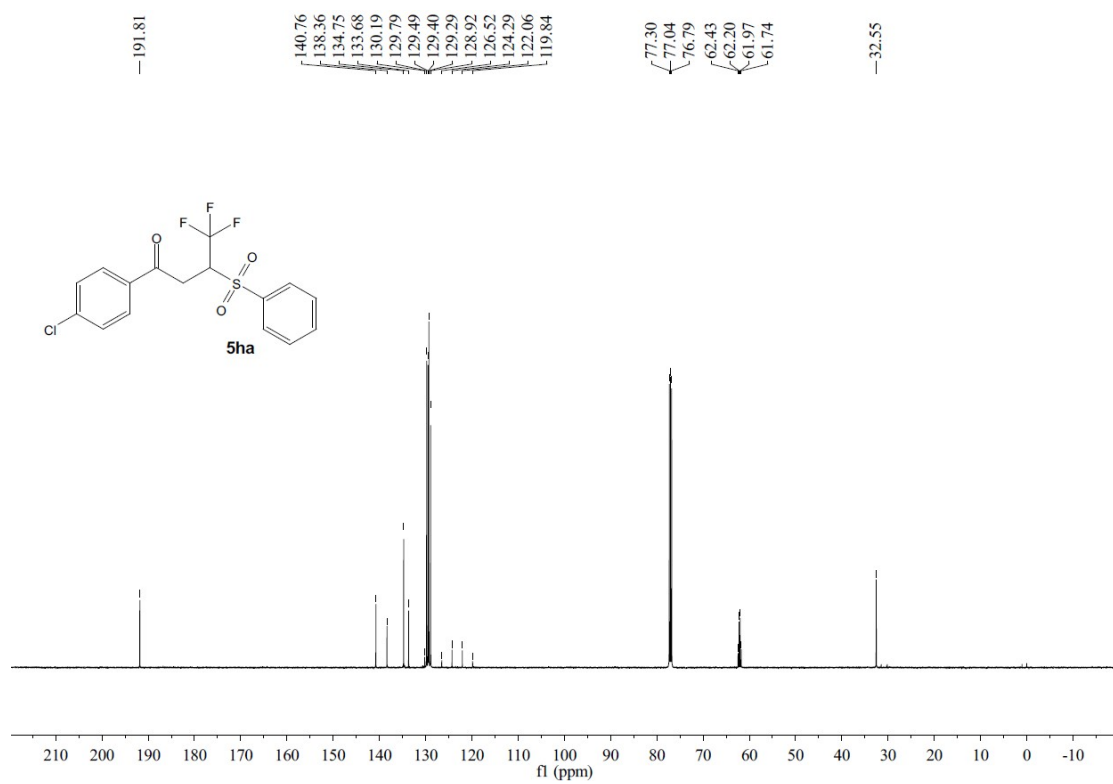

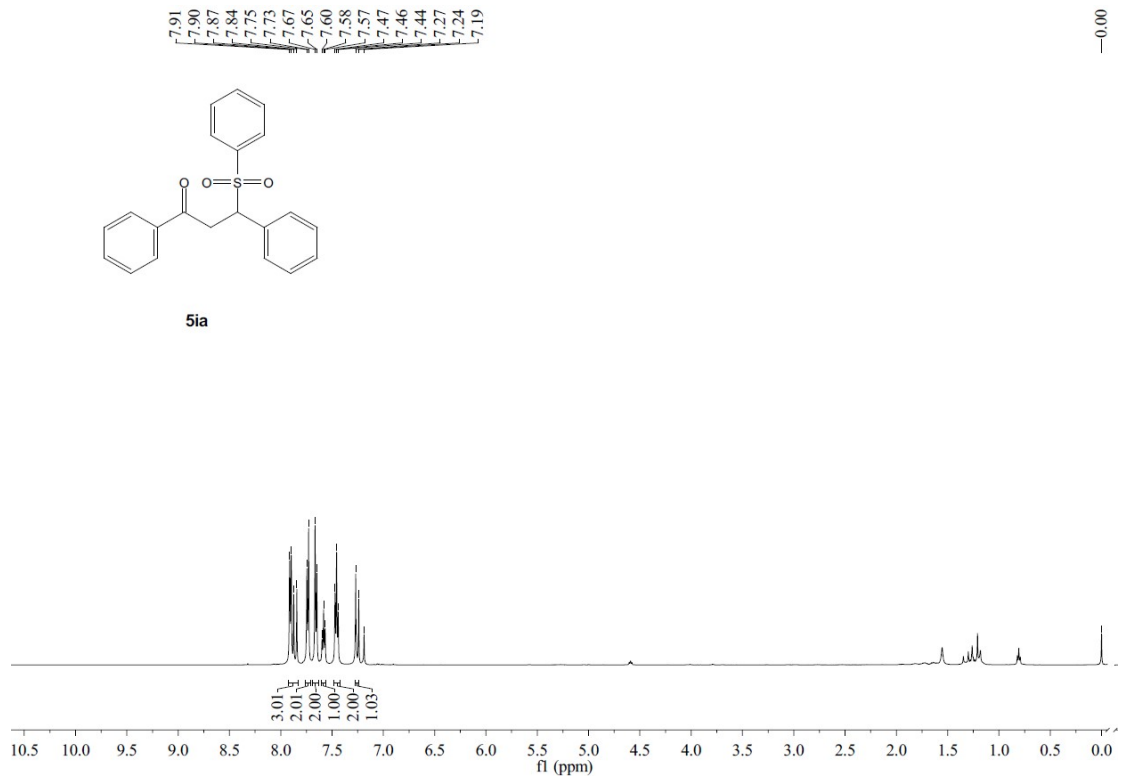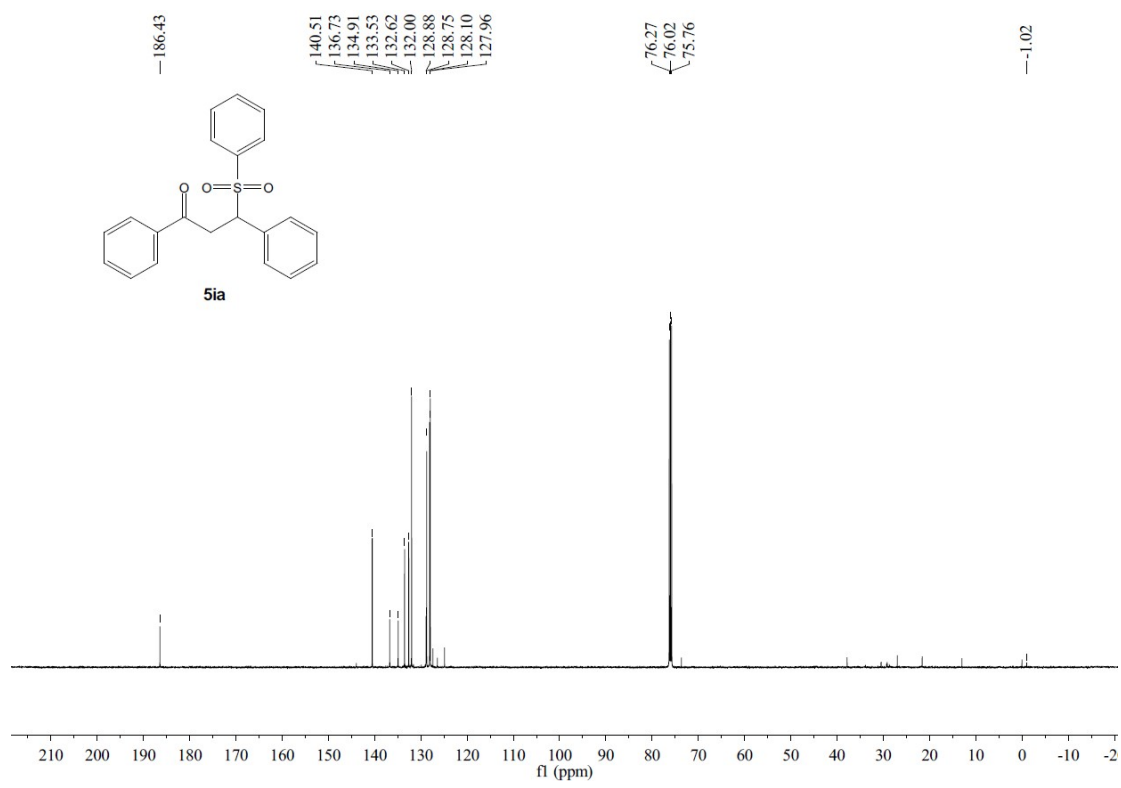

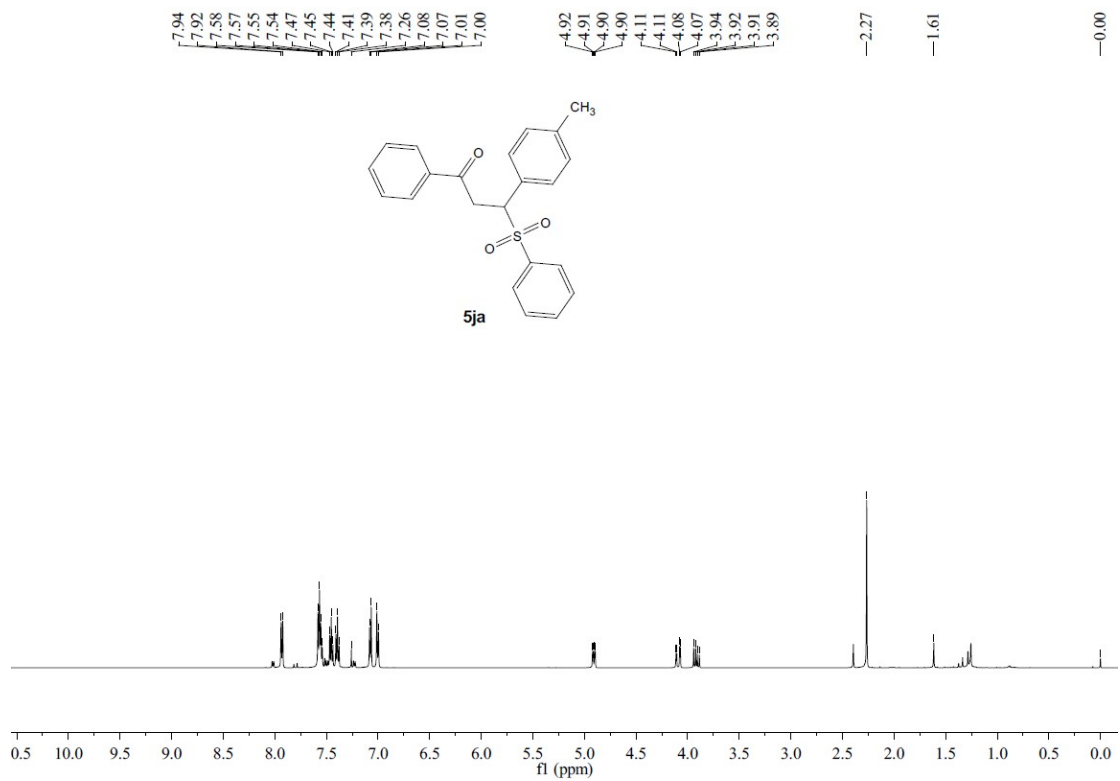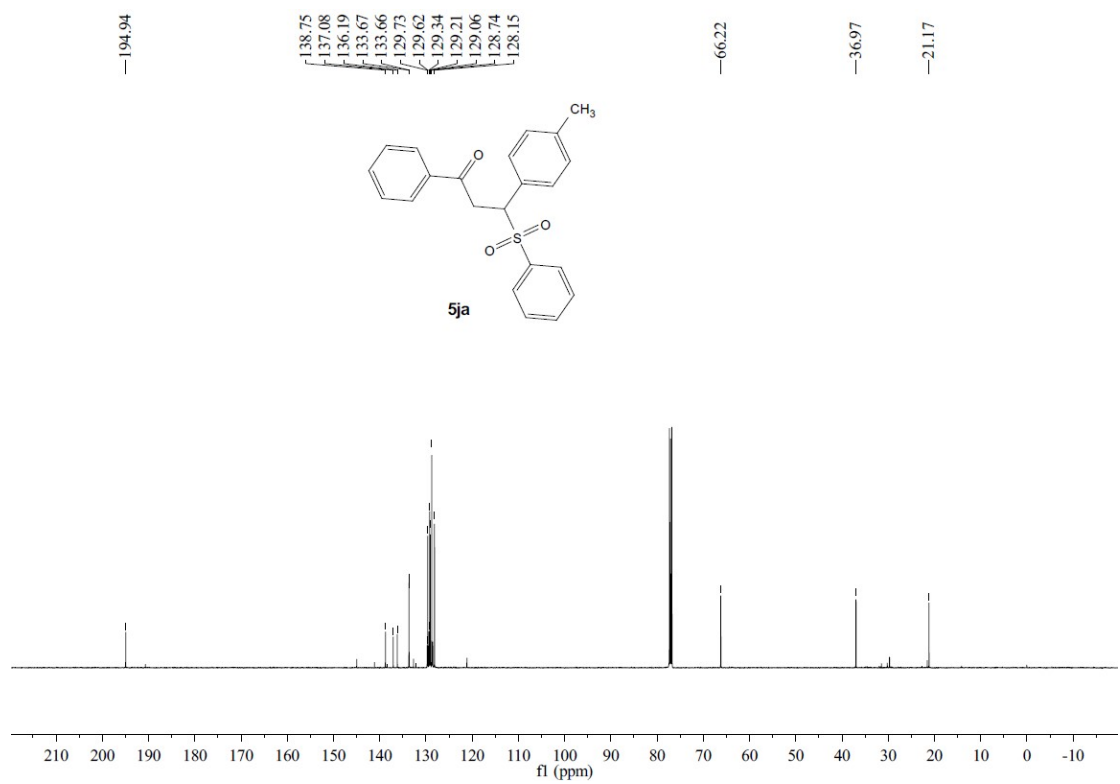



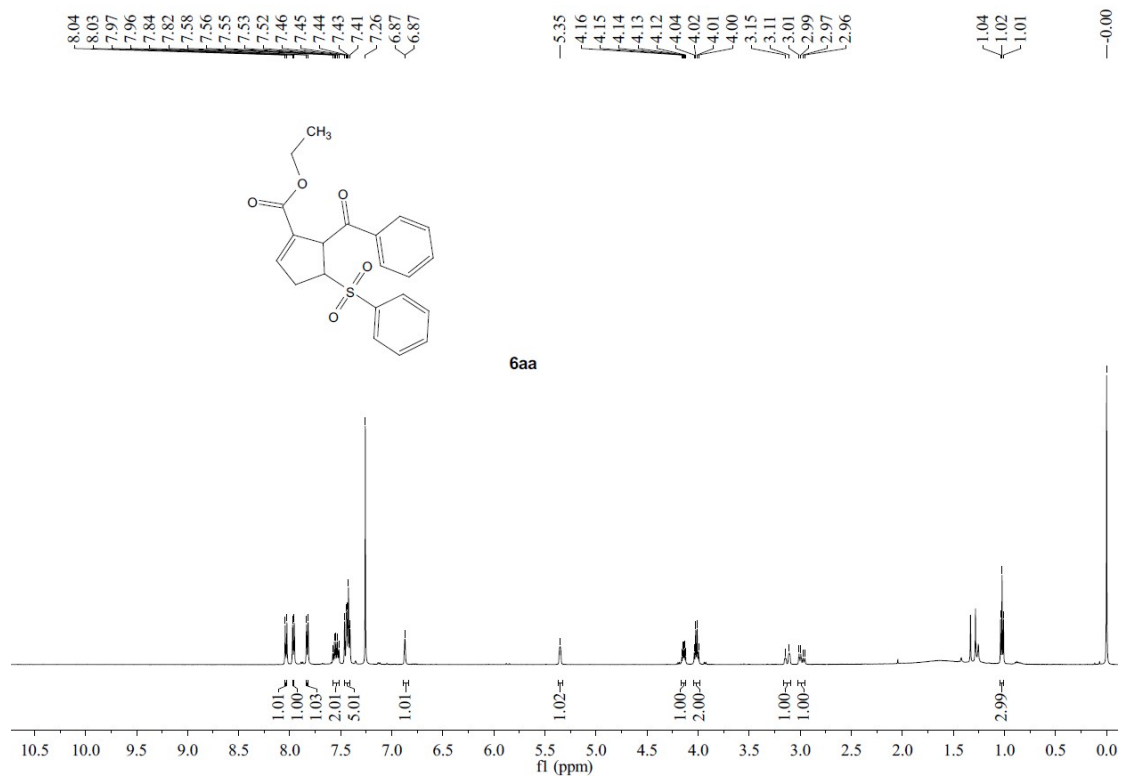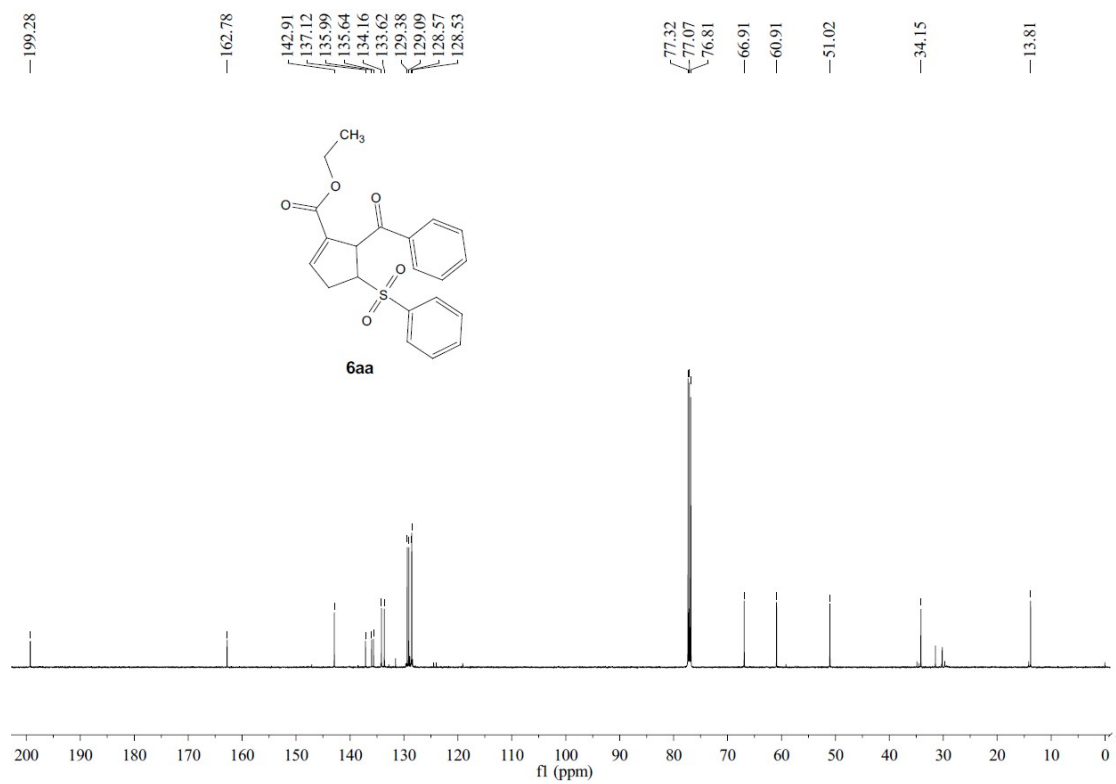

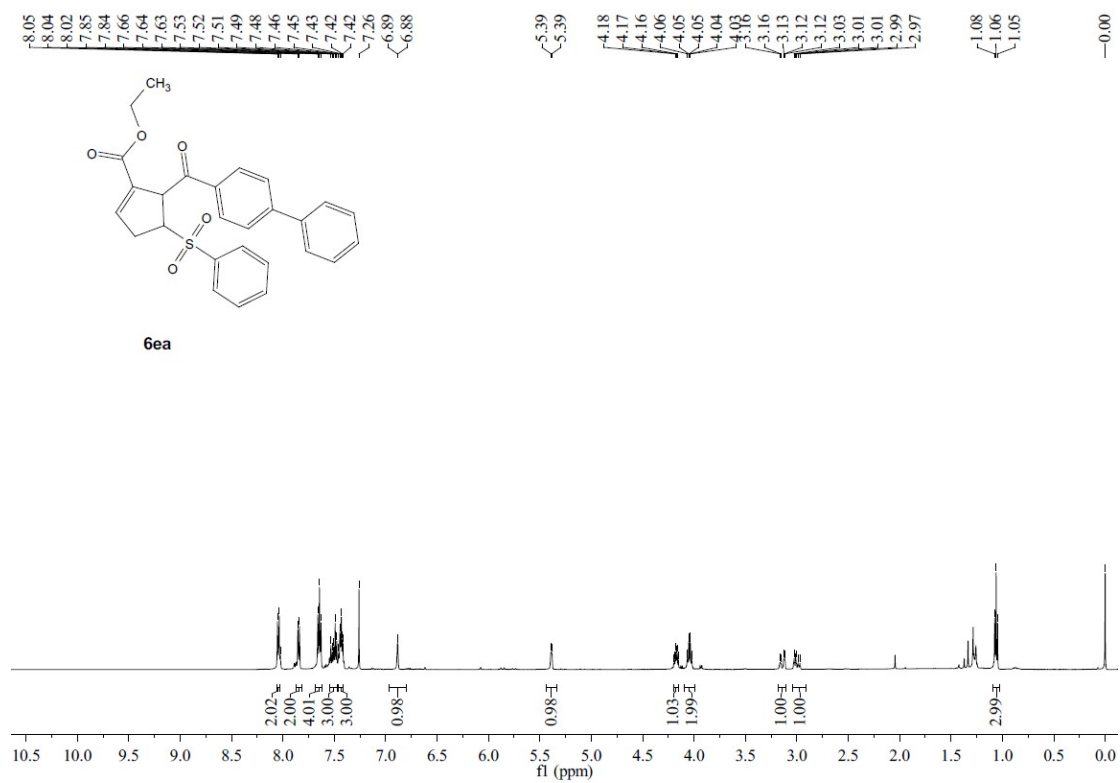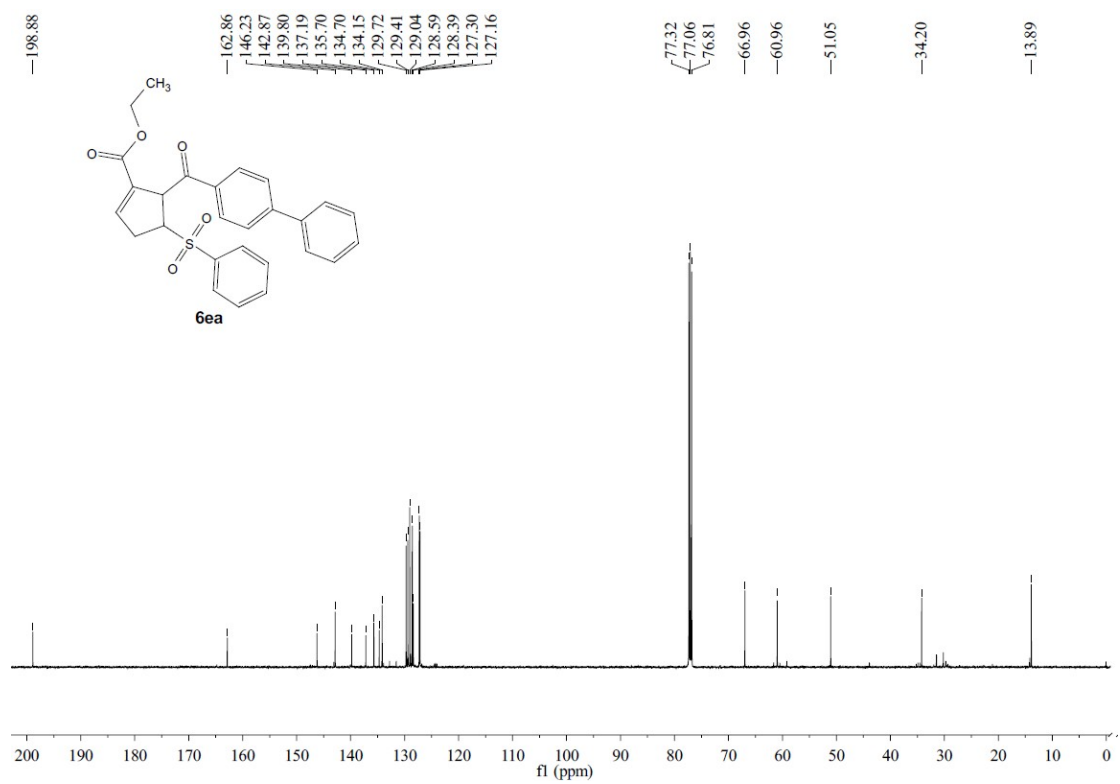

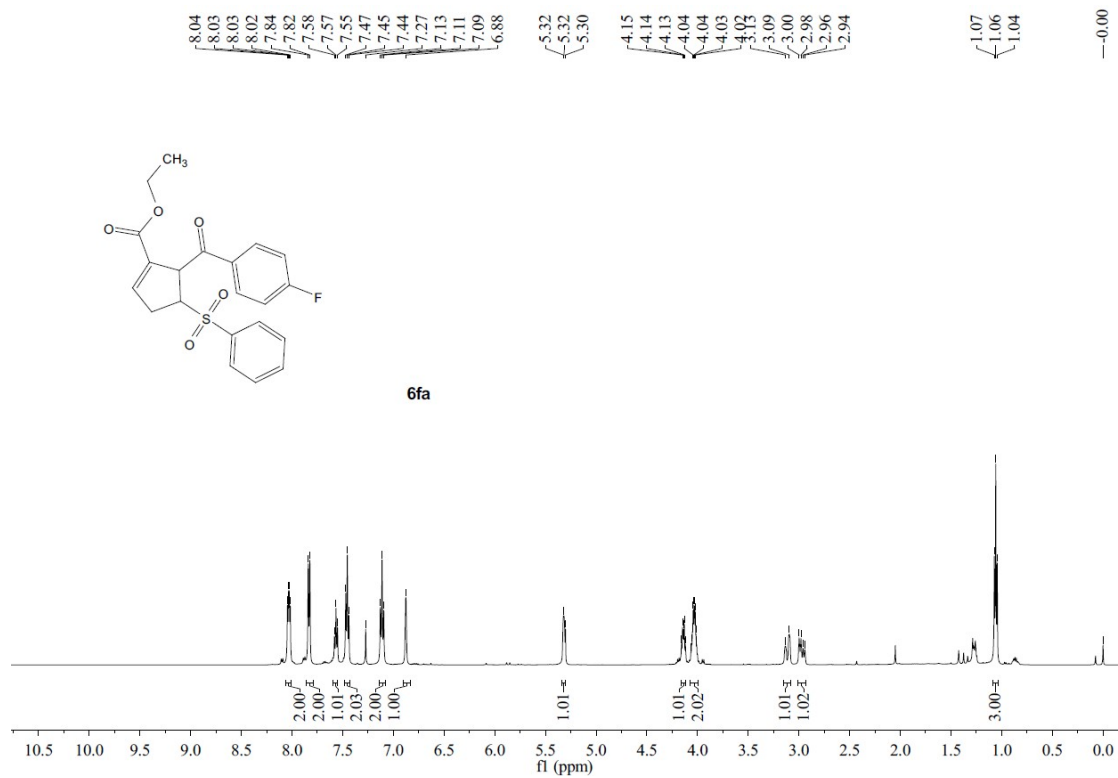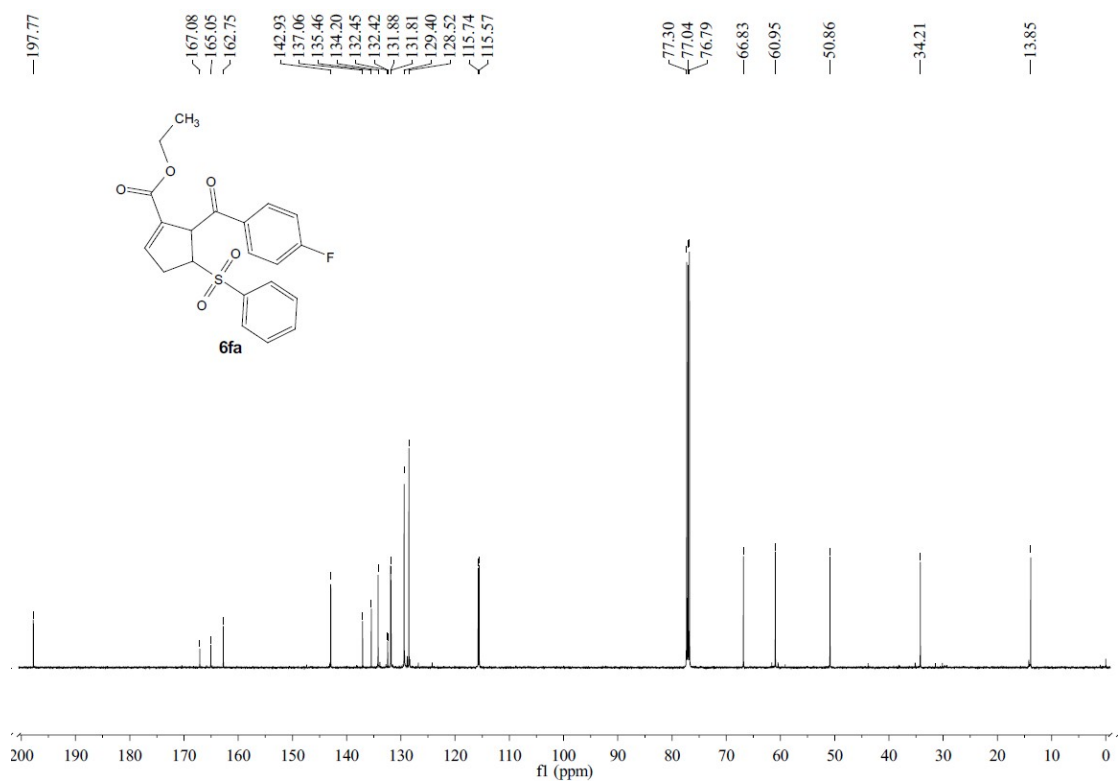

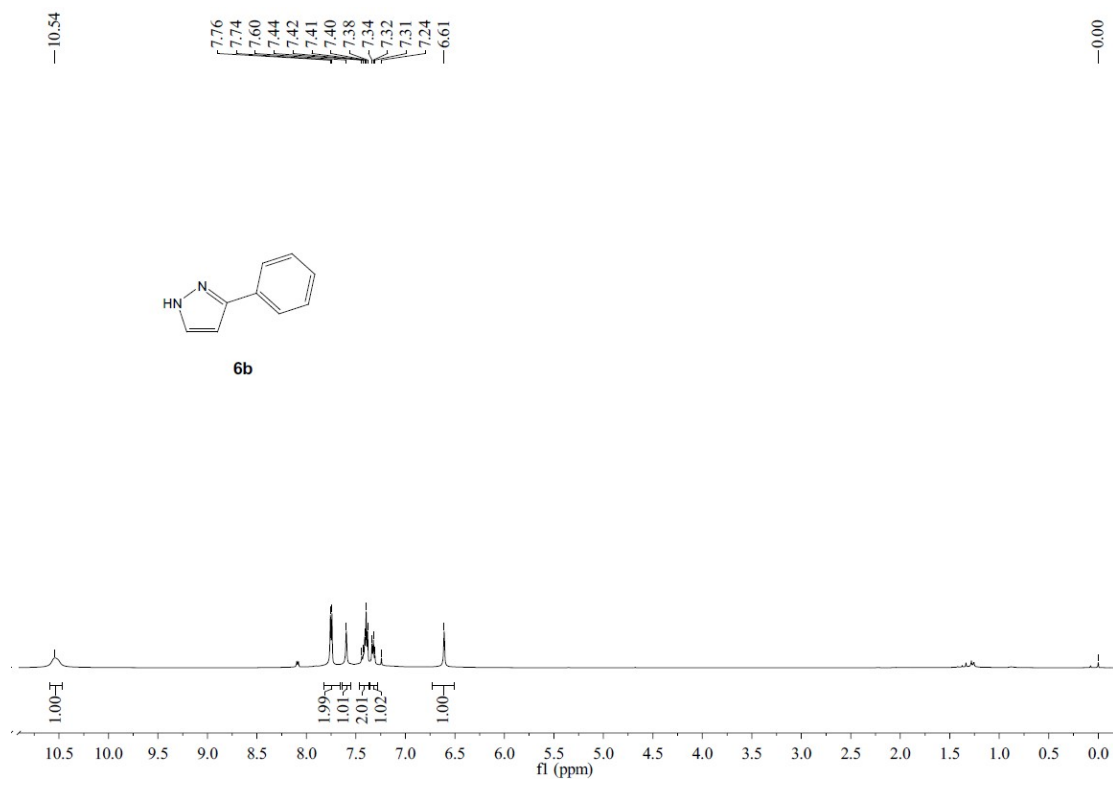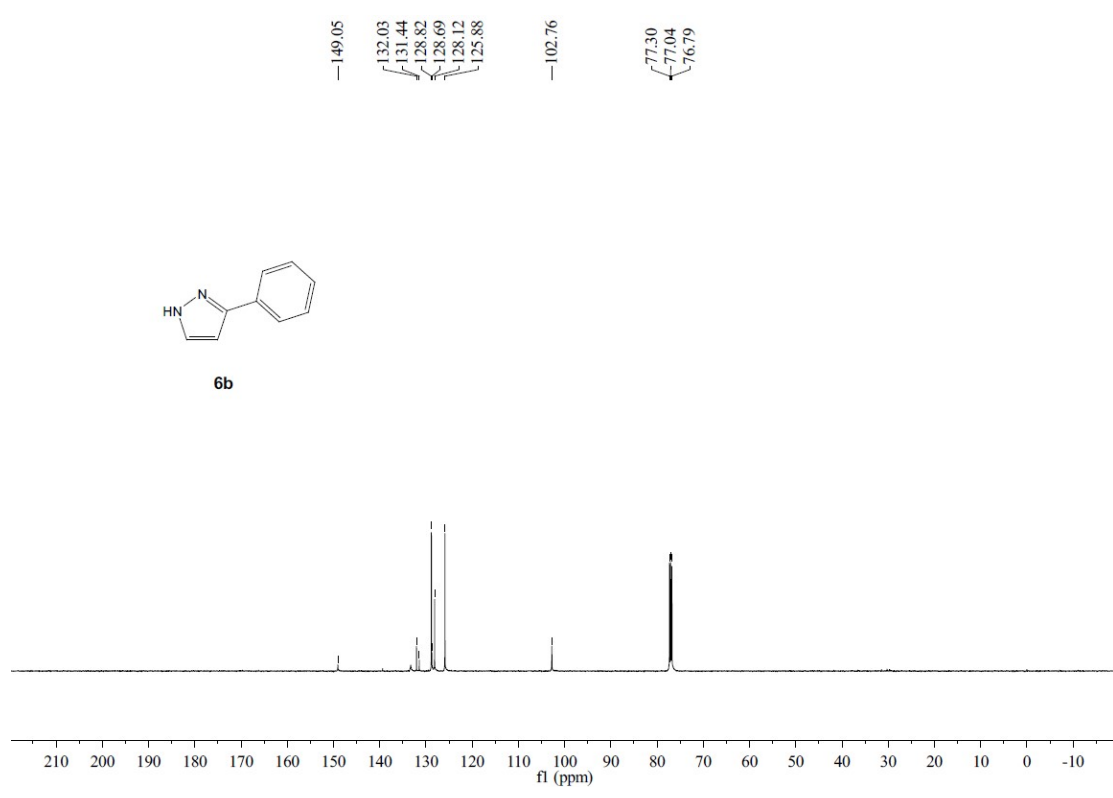

7.99  
7.98  
7.65  
7.64  
7.62  
7.42  
7.40  
7.37  
7.36  
7.35  
7.34  
7.26  
7.08  
7.06  
7.06  
7.05  
7.05  
6.98  
6.97  
6.96  
6.96  
6.94

2.04  
2.04  
2.03  
2.02  
2.01  
1.29  
1.28  
0.88  
0.87  
0.86  
0.00

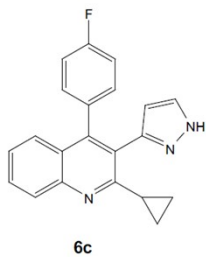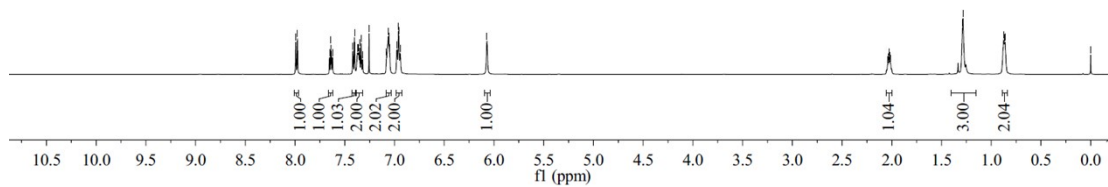

114.10

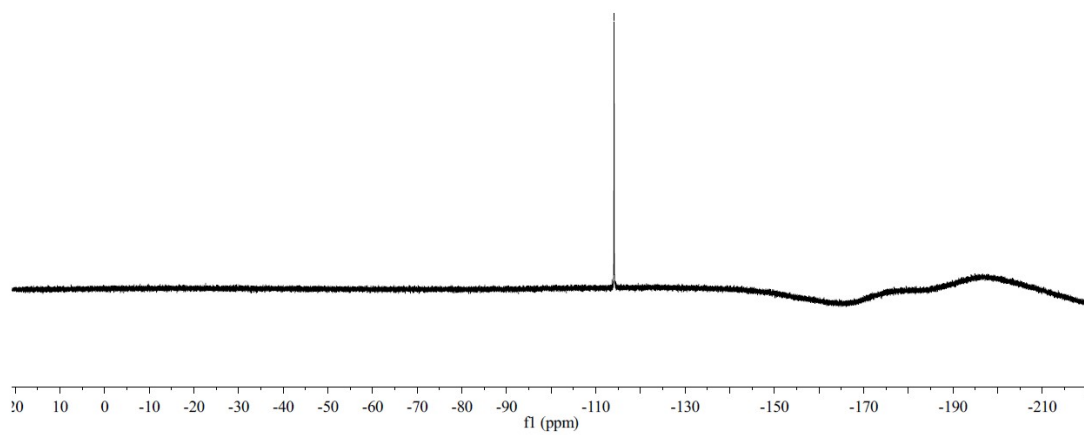

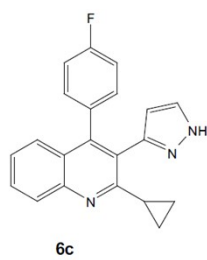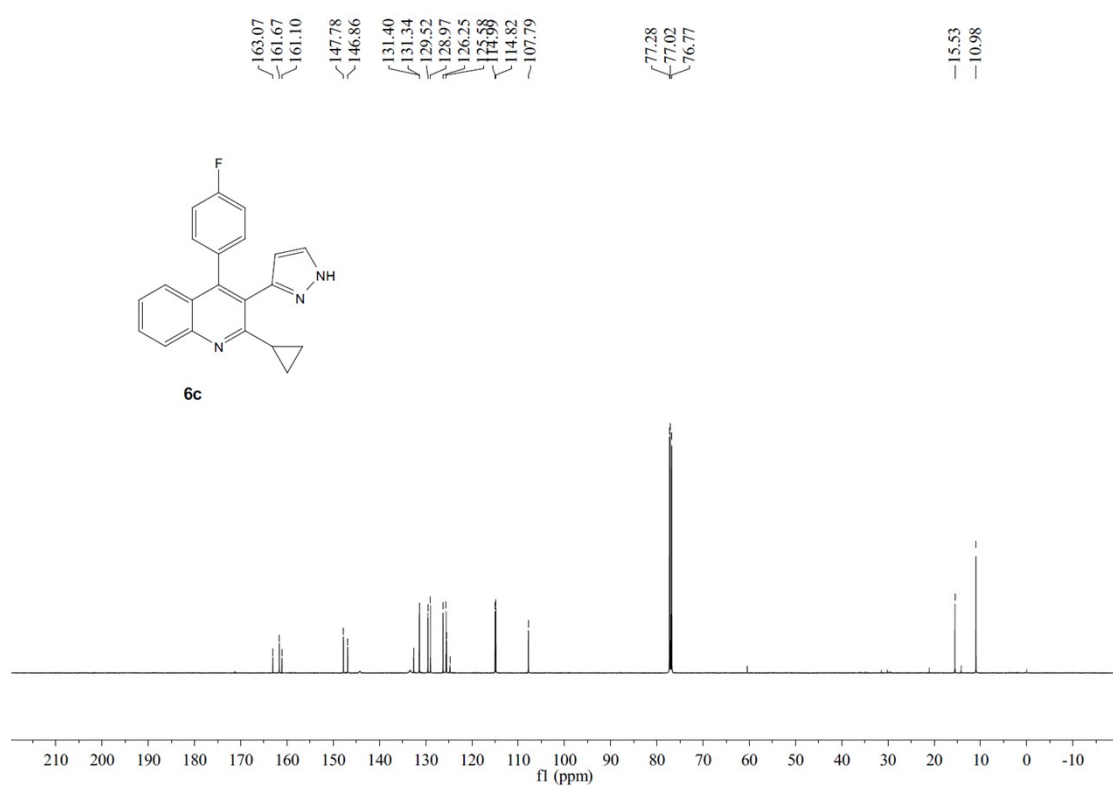

Supplement: d2ra06784f1.pdf [file d2ra06784f1.pdf]
